# The rate and effect of *de novo* mutations in a colonizing lineage of *Arabidopsis thaliana*

Moises Exposito-Alonso<sup>1,2†</sup>, Claude Becker<sup>1†</sup>, Verena J. Schuenemann<sup>3,4</sup>, Ella Reiter<sup>3</sup>, Claudia Setzer<sup>5</sup>, Radka Slovak<sup>5</sup>, Benjamin Brachi<sup>6§</sup>, Jörg Hagmann<sup>1§</sup>, Dominik G. Grimm<sup>1§</sup>, Chen Jiahui<sup>6,7</sup>, Wolfgang Busch<sup>5</sup>, Joy Bergelson<sup>6</sup>, Rob W. Ness<sup>8</sup>, Johannes Krause<sup>3,4,9</sup>, Hernán A. Burbano<sup>2,\*</sup>, Detlef Weigel<sup>1,\*</sup>

<sup>1</sup>Department of Molecular Biology, Max Planck Institute for Developmental Biology, 72076 Tübingen, Germany

<sup>2</sup>Research Group for Ancient Genomics and Evolution, Max Planck Institute for Developmental Biology, 72076 Tübingen, Germany

<sup>3</sup>Institute of Archaeological Sciences, University of Tübingen, 72070 Tübingen, Germany

<sup>4</sup>Senckenberg Center for Human Evolution and Paleoenvironment, University of Tübingen, 72070 Tübingen, Germany

<sup>5</sup>Gregor Mendel Institute, Austrian Academy of Sciences, 1030 Vienna, Austria

<sup>6</sup>Department of Ecology and Evolution, University of Chicago, Chicago, Illinois 60637, USA

<sup>7</sup>Institute of Tibet Plateau Research, Chinese Academy of Sciences, Beijing 100101, China

<sup>8</sup>Department of Biology, University of Toronto Mississauga, Mississauga, Ontario L5L 1C6, Canada.

<sup>9</sup>Max Planck Institute for the Science of Human History, 07743 Jena, Germany

<sup>†</sup>Co-first authors

<sup>§</sup>Current addresses: INRA, UMR 1202 Biodiversité Gènes & Communautés, 69 route d'Arcachon, 33610 CESTAS, France (B.B.); Computomics, 72072 Tübingen, Germany (J.H.); Department of Biosystems Science and Engineering, ETH Zurich, 4058 Basel, Switzerland (D.G.G).

\*Correspondence to: [hernan.burbano@tuebingen.mpg.de](mailto:hernan.burbano@tuebingen.mpg.de), [weigel@weigelworld.org](mailto:weigel@weigelworld.org)

Keywords: colonization, mutation, selection, herbarium genomes, aDNA, phylogenomics, population genomics, association mapping, *Arabidopsis thaliana*

32 **Because colonizations and invasions are often associated with genetic bottlenecks, they offer an**  
33 **opportunity to directly observe de novo mutations and their subsequent fate. North America has**  
34 **recently been colonized by *Arabidopsis thaliana*, and many of the individuals found today belong to a**  
35 **single lineage, HPG1. To determine substitution rates under natural conditions in this lineage, we have**  
36 **sequenced 100 HPG1 genomes from plants collected between 1863 and 2006. We infer that the last**  
37 **common HPG1 ancestor lived in the early 17th century, most likely the time when HPG1 began to**  
38 **colonize N. America. Demographic reconstructions infer substantial population size fluctuations during**  
39 **the past four centuries. Even though changing demographics can undermine the effect of natural**  
40 **selection, we observed that mutations at coding sites were at lower frequency than mutations at**  
41 **other sites, consistent with the effect of purifying selection. Exceptionally, some mutations rose to**  
42 **high frequency and some had measurable effects in root development, consistent with positive**  
43 **selection acting over mutations with an adaptive value. Our work showcases how by applying**  
44 **genomics methods to a combination of modern and historic samples we can learn about plant**  
45 **colonisations and invasions and observe “evolution in action”.**

46 Knowledge of mutation rates and efficacy of selection, which together determine the substitutions that  
47 can be observed in a population, is essential for understanding evolution<sup>1</sup>. Mutation rates are required  
48 to estimate the effective diversity of populations<sup>2</sup>, to date historic population splits<sup>3</sup>, and to predict what  
49 opportunities there are for rapid novel adaptations, for instance, to drugs or pesticides<sup>4,5</sup>. Two extreme  
50 approaches to discover these parameters are either short-term mutation accumulation experiments in  
51 the laboratory<sup>6</sup> and pedigree-based estimates<sup>7</sup>, or interspecific phylogenomic comparisons over millions  
52 of years<sup>8</sup>. Since mutation rates are generally studied independently of natural selection and population  
53 dynamics contexts, the two approaches often yield estimates that do not coincide, which has generated  
54 a heated controversy<sup>9,10</sup>. An alternative not exploited so far is the analysis of naturally occurring  
55 “evolutionary experiments” such as colonizing or invasive populations associated with a recent and  
56 strong genetic bottleneck<sup>11,12</sup>. Both colonizations and invasions are increasingly common due to human  
57 movement<sup>13,14</sup>. The study of these natural experiments is especially powerful when time-stamped  
58 samples from historic specimens can be used as internal calibration points<sup>15,16</sup>. Colonizing populations  
59 often start with very few individuals and therefore have low genetic diversity. The N. American  
60 population of the self-fertilizing plant *Arabidopsis thaliana* is no exception, with many individuals  
61 belonging to a genetically very similar lineage, haplogroup-1 (HPG1), that spread over large geographic  
62 areas<sup>17</sup>. The study of the origin along with demographic and selective dynamics of mutations in HPG1  
63 can further help us solve the current paradox generated by two evolutionary conjectures: “Baker’s law”,  
64 inspired by the observation that selfing species are more successfully colonizing new environments than  
65 outcrossing ones, and “Muller’s ratchet”, which posits that selfing populations are evolutionary dead  
66 ends, since low diversity and accumulation of more deleterious mutations should hinder their ability to  
67 adapt to new environments<sup>18–21</sup>.

68 To better understand the evolution of HPG1, we sequenced 27 herbarium specimens, from  
69 1863–1993, and 76 live isolates of this lineage collected 1993–2006 (Fig. 1; Table S1). DNA retrieved from  
70 herbarium specimens showed biochemical features typical of ancient DNA<sup>22</sup>, which indicates that the  
71 DNA recovered from historic samples is authentic (Fig. S1, see Supplementary Online Material [SOM] for  
72 details). We mapped reads against an HPG1 pseudo-reference genome<sup>23</sup>, focusing on single nucleotide

73 polymorphisms (SNPs) because the short sequence reads of herbarium samples preclude accurate calling  
74 of structural variants. Genome sequences were of high quality, with herbarium samples covering  
75 96.8–107.2 Mb of the 119 Mb reference, and modern samples covering 108.0–108.3 Mb (Table S1). Pairs  
76 of herbarium genomes differed on average by 109–222 SNPs, and pairs of modern genomes by 186–299  
77 SNPs, that is, they ranged from 99.9997 to 99.9999 % identity .

78 A neighbor joining tree (Fig. 2A), multi-dimensional scaling (MDS) (Fig. 2B), and a parsimony  
79 network (Fig. 2C) confirmed very close relatedness of the HPG1 genomes, with only three apparent  
80 intra-HPG1 recombinants (Fig. 2C). Removing these resolved the reticulations in the parsimony network  
81 (Fig. 2D). The remaining 100 samples (Table S1) constitute a quasi-clonal lineage mostly devoid of  
82 effective recombination and population structure, and without SNPs in organellar genomes. The very low  
83 genome-wide nuclear diversity ( $\pi = 0.000002$ ,  $\theta_W = 0.00001$ , 5,013 segregating sites) is two orders of  
84 magnitude lower than in the native range of the species ( $\theta_W = 0.007$ ) (ref. <sup>24</sup>) (Table S1). The enrichment  
85 of low frequency variants in the site frequency spectrum (Tajima's  $D = -2.84$ ; global =  $-2.04$ ) (ref. <sup>24</sup>) and  
86 low levels of polymorphism are consistent with a recent bottleneck followed by population expansion  
87 (Fig. 3). The obvious explanation is that the bottleneck corresponds to a colonization founder event,  
88 likely by very few closely related individuals, or perhaps only a single plant. To describe intra-HPG1  
89 relationships in a more sophisticated manner, we used Bayesian phylogenetic inference, exploiting  
90 collection dates for tip calibration of phylogenetic trees. The 76 modern individuals formed a largely  
91 monophyletic clade, with only four interspersed herbarium samples from the second half of the 20<sup>th</sup>  
92 century (Fig. 3A, B). Long branches reflected an abundance of singletons, typical of expanding  
93 populations after bottlenecks.

94 To estimate the substitution rate in the HPG1 lineage, we used distance- and phylogeny-based  
95 methods that take advantage of the known collection dates. One has to distinguish between the  
96 *mutation rate*, which is the rate at which genomes change due to DNA damage, faulty repair, gene  
97 conversion and replication errors, and *substitution rate*, which is the rate at which mutations survive and  
98 accumulate after demographic and natural selective processes<sup>25</sup>. Under neutral evolution, mutation and  
99 substitution rates should be equal<sup>26</sup>. The simple evolutionary history of the HPG1 natural population  
100 enables direct estimates of substitution rates, and by comparing these with mutation rates calculated in  
101 controlled conditions, we can learn about demographic and selective forces. In the distance method, the  
102 substitution rate is calculated from correlation between differences in collection time in historic-modern  
103 sample pairs, and the number of changes between those pairs relative to a reference (Fig. 3C), scaled to  
104 the size of the genome accessible to Illumina sequencing. This method resulted in an estimated rate of  
105  $2.11 \cdot 10^{-9}$  substitutions site<sup>-1</sup> year<sup>-1</sup> (95% bootstrap Confidence Interval [CI]:  $1.88-2.33 \cdot 10^{-9}$ ) using  
106 rigorous SNP calling quality thresholds. Relaxing the quality thresholds for base calling and minimum  
107 genotyped rate affects both the number of called SNPs and the length of the interrogated reference  
108 sequence<sup>27</sup>. These largely cancelled each other out, and our estimates were relatively stable, between  
109  $2.1-3.2 \cdot 10^{-9}$  substitutions site<sup>-1</sup> year<sup>-1</sup> (Table S3). The Bayesian phylogenetic approach, which uses the  
110 collection years for tip calibration and assumes a relaxed molecular clock, yielded a similar estimate,  
111  $4.0 \cdot 10^{-9}$ , with confidence ranges overlapping the above estimates (95% Highest Posterior Probability  
112 Density [HPPD]:  $3.2-4.7 \cdot 10^{-9}$ ). Based on the results obtained with different methods, we can confidently  
113 say that the substitution rate in the wild should be between  $2$  to  $5 \cdot 10^{-9}$  site<sup>-1</sup> year<sup>-1</sup>. We recommend

114 that these rates be used to date temporal splits between populations. To be able to compare our  
115 substitution rate with the mutation rate, both need to be expressed per generation. While *A. thaliana* is  
116 an annual plant, seed bank dynamics generate a delay of average generation time at the population  
117 scale. A comprehensive study of multiple *A. thaliana* populations reports an average generation time of  
118 1.3 years<sup>28</sup>, with a notable variance across populations. Re-scaling with the mean generation time led to  
119 an adjusted substitution rate of  $2.7 \times 10^{-9}$  substitutions site<sup>-1</sup> generation<sup>-1</sup> (95% CI  $2.4\text{--}3.0 \times 10^{-9}$ ) (Fig. 3E).  
120 This is much lower than the rate of  $7.1 \times 10^{-9}$  mutations site<sup>-1</sup> generation<sup>-1</sup> (95% CI  $6.3\text{--}7.9 \times 10^{-9}$ ) (Tables  
121 S2, S3) that one can calculate from resequencing data for mutation accumulation (MA) lines in the Col-0  
122 reference background grown in the greenhouse<sup>29</sup>.

123 Differences in “per generation” rates could be caused by several factors, such as an imperfect  
124 knowledge of the generation time in the wild (for rates using different generation times, see Fig. 3E). In  
125 addition, mutagenic environmental factors, genome background, mutation spectrum, or methodological  
126 idiosyncrasies can affect the estimates. For example, transposons, which comprise ~8% of the genome  
127 and ~19% of the SNPs in greenhouse MA lines, had fewer SNPs called than expected in HPG1 (~13%).  
128 This is likely due to difficulties when mapping reads to genomic areas with extensive structural  
129 variation<sup>30,30a,30d,30</sup> could have contributed to the lower substitution rate estimates for HPG1 (Fig. 3E,  
130 Fig S3C, Table S3). In addition, the substitution spectrum in HPG1 is shifted to a lower  
131 transition/transversion ratio compared to the MA lines (Fig. 3C and Fig. S3), which could be caused by  
132 methylated cytosines (see Fig. S4 and SOM). Finally, an alternative evolutionary explanation for the rate  
133 differences is that purifying selection slows the accumulation of mutations in the wild by removing  
134 deleterious mutations (Fig. 3E). To find evidence of negative selection independently of dataset  
135 comparisons, we looked at the site frequency spectrum of different annotations within the HPG1  
136 dataset. Medium-frequency variants, which are more exposed to purifying selection<sup>31</sup>, were more  
137 sharply depleted in genomic regions expected to be under greater selection constraint (genic and  
138 nonsynonymous sites) than in putatively more neutral ones (intergenic or synonymous sites) (Fisher’s  
139 Exact test,  $p$ -value  $< 0.05$  for both comparisons, see Fig. S5). Therefore, even if we cannot say with  
140 certainty that purifying selection drives the differences between HPG1 and MA rates, it must be  
141 responsible for the differences between different types of sites within HPG1.

142 The substitution rate allows dating of HPG1’s origin. The mean estimate from Bayesian methods  
143 was the year 1597 (HPPD 95%: 1519–1660) (Fig. 3A, B). We also used a non-phylogenetic method that  
144 utilizes the relationship between the average genetic distance between any two individuals, with the  
145 substitution rate multiplied by twice the divergence time and the genome size; solving by the divergence  
146 time in the equation we obtained 353 years. When subtracted from the average collection date of our  
147 samples, the corresponding point estimate is 1625, within the confidence interval of the Bayesian  
148 estimate. This corresponds to the date of the last common ancestor of HPG1, and should thus be close to  
149 the time of introduction of HPG1 to N. America. (The date is older than our previous estimate, for which  
150 we had naively applied the higher greenhouse mutation rate<sup>23</sup>). Inference of  $N_e$  through time suggested  
151 exponential population growth until the early 19<sup>th</sup> century (Fig 3B, Fig S6C). During the 20<sup>th</sup> century the  
152  $N_e$  trajectory showed oscillating patterns between growth and bottlenecks, which are typical of selfing  
153 organisms<sup>32</sup>, and which likely led to a replacement of most HPG1 sublineages, as the modern samples  
154 are all very closely related (Fig. 3 A, B).

155            Since we knew both the collection years and locations of origin of the HPG1 samples, we could  
156 also analyze the migration dynamics of HPG1. Although unknown sources of sampling bias could affect  
157 our analyses<sup>16</sup>, the phylogeographic models suggested that HPG1 came to cover much of its modern  
158 range soon after its introduction to N. America (Fig. S6 A,B). We found a significant correlation between  
159 collection date and both latitude and longitude (Fig. 1C) , which we interpret as a net, highly dispersed,  
160 movement in a northwestern direction over time. Additional support for this hypothesis comes from an  
161 isolation-by-distance signal, which is most consistent with a historic westward migration and a more  
162 recent reverse eastward migration (Fig. S6 E,F). The apparent source of those new migrants now  
163 persisting along the East coast was the Lake Michigan area .

164            Finally, while we did not expect to easily find mutations that have helped the HPG1 lineage to  
165 adapt to its new N. American environment, we wanted to determine whether any of the mutations have  
166 measurable phenotypic effects. Focusing on flowering-related, reproductive and root traits of likely  
167 ecological relevance, we detected significant quantitative heritable variation (Table S4). We used an  
168 approach borrowed from GWAS to find SNPs that had increased in frequency (>5%) and were associated  
169 with these phenotypes. Because conventional GWAS relies on recombination, which is almost absent  
170 from our population, our approach could not identify individual SNPs, but only SNP cohorts distributed  
171 across the genome<sup>33</sup>. We found 79 SNPs associated with root traits, of which nine resulted in  
172 nonsynonymous changes. We did not find any SNPs associated with flowering time, even though it is  
173 thought to be a key player of rapid adaptation in many annual species<sup>34,35</sup>. Nineteen other SNPs, of  
174 which four were nonsynonymous, were associated with climate variables ([www.worldclim.org](http://www.worldclim.org)) even  
175 after correction for latitude and longitude, and some of the hits overlapped between root traits and  
176 climate variables (Table 1, Table S5, Fig. S7). Although a good number of SNPs was associated with  
177 phenotypes and/or climate variables, it is not possible to confidently pinpoint individual candidate SNPs,  
178 since the extent of whole-genome linkage disequilibrium (LD) in HPG1 is high (Fig. S9 B,C). However,  
179 there is a gradient in the extent of LD between SNPs associated with root architecture, which could help  
180 to determine particularly promising candidates for molecular characterization and quantification of  
181 fitness in natural conditions (Table 1, Fig. S9 D-F). For example, the gene AT5G19330, overexpression of  
182 which confers salt tolerance<sup>36</sup>, contains a SNP that was unlinked to other hits and that has risen in the  
183 last four centuries to a frequency of 40%. This SNP is likely to change protein function, as it leads to a  
184 substitution of cysteine for tryptophan. Another nonsynonymous SNP is located in AT2G38910, encoding  
185 a calcium dependent kinase that belongs to a family of factors involved in root hydraulic conductivity and  
186 phytohormone response<sup>37,38</sup>. Remarkably, most derived root-associated alleles, when compared with  
187 equally frequent neutral alleles, were first seen in older herbarium samples, most of which were  
188 collected near Lake Michigan, the apparent source of modern populations (Fig. S8). Altogether, the rise  
189 in frequency, older age of some *de novo* mutations, and their quantifiable phenotypic effects and  
190 climatic correlations strengthen the hypothesis that they might have an adaptive value and were under  
191 positive selection. These results favor Baker's law, which alleges that selfing species can often adapt to  
192 new environments, over the evolutionary dead-end hypothesis of Muller's ratchet. Furthermore, these  
193 suggestive signals of rapid adaptation via *de novo* mutations could change the current paradigm that  
194 invasive species adapt most often from sources of standing variation, either because an incomplete



195 bottleneck left residual variation or because there has been subsequent admixture with native species or  
196 secondary colonizers<sup>39,40</sup>.

197 In summary, we have exploited whole-genome information from historic and contemporary  
198 collections of a herbaceous plant to empirically characterize the effect of evolutionary forces during a  
199 recent colonization. With this natural time series experiment, we could directly estimate the nuclear  
200 substitution rate in wild *A. thaliana* populations. This parameter, which provides immediate ability to  
201 date key events of populations, is only known for one other species: *Homo sapiens*<sup>41</sup>. We have  
202 presented evidence that purifying selection is perceptible already over time scales spanning only a few  
203 centuries. Although the colonizing population we have investigated has limited diversity and suffered  
204 rapid fluctuations in population size, there appear to be *de novo* mutations with phenotypic effects that  
205 contributed to rapid adaptation. While *A. thaliana* HPG1 is not an invasive species, it can teach us about  
206 fundamental evolutionary processes behind successful colonizations and adaptation to new  
207 environments. Our work should encourage others to search for similar natural experiments and to unlock  
208 the potential of herbarium specimens to study “evolution in action”.

209  
210 **Online Content** Methods, along with any additional Extended Data display items, are available in the online version  
211 of the paper; references unique to these sections appear only in the online paper.

212  
213 **Supplementary Information** is available in the online version of the paper.

214  
215 **Acknowledgments** For providing and retrieving herbarium specimens, we thank R. Capers, J. Devos, G. Shirsekar,  
216 M. S. Dossmann, J. Freudenstein, C. M. Herring, C. Niezgodna, C. A. McCormick, J. Peter and M. Thines. We thank X.  
217 Zhao and I. Henderson for recombination estimates, C. Lanz for sequencing support, C. Goeschl, B. Zierfuss and B.  
218 Wohlrab for help with root analyses, and P. Lang, D. Seymour, and D. Koenig for thorough proofreading and  
219 comments on the manuscript. We thank M. Nordborg for discussions and pointing us to the work of A.R.  
220 Templeton, K. Pruefer for input on data analysis, and the Weigel and Burbano labs for comments. Supported by ERC  
221 Advanced Grant IMMUNEMESIS and the President’s Fund of the Max Planck Society, project “Darwin”.

222 **Author Contributions** H.A.B. and D.W. conceived and supervised the project, and coordinated the collaborative  
223 effort. J.B. coordinated the collection of modern seed samples. C.J., B.B. and J.B. performed and analyzed flowering  
224 time and seed set greenhouse experiments. C.S. and R.S. performed and analyzed root assays and seed size  
225 measurements under the supervision of W.B.; C.B. and J.H. sequenced and curated modern samples, coordinated  
226 by D.W.; H.A.B. coordinated the collection and analysis of herbarium samples. J.K. coordinated the extraction of  
227 DNA and library preparation of herbarium samples. V.J.S. and E.R. prepared sequencing libraries from herbarium  
228 specimens. C.B. called variants in HPG1. J.H. called variants in mutation accumulation lines. M.E.A. performed the  
229 population and quantitative genomic analyses with supervision of R.N., C.B. and H.A.B. The paper was written by  
230 M.E.A., C.B., H.A.B. and D.W. with comments from all coauthors.

231 **Author Information** Reprints and permissions information is available at [www.nature.com/reprints](http://www.nature.com/reprints). The authors  
232 declare no competing financial interests. Readers are welcome to comment on the online version of the paper.  
233 Correspondence and requests for materials should be addressed to H.A.B. ([hernan.burbano@tue.mpg.de](mailto:hernan.burbano@tue.mpg.de)) or D.W.  
234 ([weigel@weigelworld.org](mailto:weigel@weigelworld.org)).

235

## REFERENCES

- 236 1. Lynch, M. *et al.* Genetic drift, selection and the evolution of the mutation rate. *Nat. Rev. Genet.* **17**, 704–714  
237 (2016).
- 238 2. Leffler, E. M. *et al.* Revisiting an old riddle: what determines genetic diversity levels within species? *PLoS Biol.*  
239 **10**, e1001388 (2012).
- 240 3. Scally, A. & Durbin, R. Revising the human mutation rate: implications for understanding human evolution.  
241 *Nat. Rev. Genet.* **13**, 745–753 (2012).
- 242 4. Pennings, P. S. & Hermisson, J. Soft Sweeps II—Molecular Population Genetics of Adaptation from Recurrent  
243 Mutation or Migration. *Mol. Biol. Evol.* **23**, 1076–1084 (2006).
- 244 5. Karasov, T., Messer, P. W. & Petrov, D. A. Evidence that adaptation in *Drosophila* is not limited by mutation at  
245 single sites. *PLoS Genet.* **6**, e1000924 (2010).
- 246 6. Halligan, D. L. & Keightley, P. D. Spontaneous Mutation Accumulation Studies in Evolutionary Genetics. *Annu.*  
247 *Rev. Ecol. Evol. Syst.* **40**, 151–172 (2009).
- 248 7. Roach, J. C. *et al.* Analysis of genetic inheritance in a family quartet by whole-genome sequencing. *Science*  
249 **328**, 636–639 (2010).
- 250 8. Wolfe, K. H., Sharp, P. M. & Li, W.-H. Rates of synonymous substitution in plant nuclear genes. *J. Mol. Evol.* **29**,  
251 208–211 (1989).
- 252 9. Subramanian, S. & Lambert, D. M. Selective constraints determine the time dependency of molecular rates for  
253 human nuclear genomes. *Genome Biol. Evol.* **4**, 1127–1132 (2012).
- 254 10. Gao, Z., Wyman, M. J., Sella, G. & Przeworski, M. Interpreting the Dependence of Mutation Rates on Age and  
255 Time. *PLoS Biol.* **14**, e1002355 (2016).
- 256 11. Sax, D. F. *et al.* Ecological and evolutionary insights from species invasions. *Trends Ecol. Evol.* **22**, 465–471  
257 (2007).
- 258 12. G. F. Gauze. *The struggle for existence.* (The Williams & Wilkins company, 1934).
- 259 13. van Kleunen, M. *et al.* Global exchange and accumulation of non-native plants. *Nature* **525**, 100–103 (2015).
- 260 14. Razanajatovo, M. *et al.* Plants capable of selfing are more likely to become naturalized. *Nat. Commun.* **7**,  
261 13313 (2016).
- 262 15. Green, R. E. & Shapiro, B. Human evolution: turning back the clock. *Curr. Biol.* **23**, R286–8 (2013).
- 263 16. Crawford, P. H. C. & Hoagland, B. W. Can herbarium records be used to map alien species invasion and native  
264 species expansion over the past 100 years? *J. Biogeogr.* **36**, 651–661 (2009).
- 265 17. Platt, A. *et al.* The scale of population structure in *Arabidopsis thaliana*. *PLoS Genet.* **6**, e1000843 (2010).
- 266 18. Barrett, S. C. H. Foundations of invasion genetics: the Baker and Stebbins legacy. *Mol. Ecol.* **24**, 1927–1941  
267 (2015).
- 268 19. Stebbins, G. L. Self Fertilization and Population Variability in the Higher Plants. *Am. Nat.* **91**, 337–354 (1957).
- 269 20. Muller, H. J. THE RELATION OF RECOMBINATION TO MUTATIONAL ADVANCE. *Mutat. Res.* **106**, 2–9 (1964).
- 270 21. Lynch, M., Conery, J. & Burger, R. Mutation Accumulation and the Extinction of Small Populations. *Am. Nat.*  
271 **146**, 489–518 (1995).
- 272 22. Weiß, C. L. *et al.* Temporal patterns of damage and decay kinetics of DNA retrieved from plant herbarium  
273 specimens. *Royal Society Open Science* **3**, 160239 (2016).
- 274 23. Hagemann, J. *et al.* Century-scale Methylome Stability in a Recently Diverged *Arabidopsis thaliana* Lineage. *PLoS*  
275 *Genet.* **11**, e1004920–e1004920 (2015).
- 276 24. 1001 Genomes Consortium. 1,135 Genomes Reveal the Global Pattern of Polymorphism in *Arabidopsis*  
277 *thaliana*. *Cell* **0**, (2016).
- 278 25. Barrick, J. E. & Lenski, R. E. Genome dynamics during experimental evolution. *Nat. Rev. Genet.* **14**, 827–839  
279 (2013).

- 280 26. Kimura, M. On the evolutionary adjustment of spontaneous mutation rates. *Genet. Res.* **9**, 23–23 (1967).  
281 27. Ness, R. W., Morgan, A. D., Colegrave, N. & Keightley, P. D. Estimate of the spontaneous mutation rate in  
282 *Chlamydomonas reinhardtii*. *Genetics* **192**, 1447–1454 (2012).  
283 28. Falahati-Anbaran, M., Lundemo, S. & Stenøien, H. K. Seed dispersal in time can counteract the effect of gene  
284 flow between natural populations of *Arabidopsis thaliana*. *New Phytol.* **202**, 1043–1054 (2014).  
285 29. Ossowski, S. *et al.* The rate and molecular spectrum of spontaneous mutations in *Arabidopsis thaliana*. *Science*  
286 **327**, 92–94 (2010).  
287 30. Treangen, T. J. & Salzberg, S. L. Repetitive DNA and next-generation sequencing: computational challenges and  
288 solutions. *Nat. Rev. Genet.* **13**, 36–46 (2012).  
289 31. Charlesworth, B. & Charlesworth, D. *Elements of Evolutionary Genetics*. (Roberts and Company Publishers,  
290 2010).  
291 32. Arunkumar, R., Ness, R. W., Wright, S. I. & Barrett, S. C. H. The evolution of selfing is accompanied by reduced  
292 efficacy of selection and purging of deleterious mutations. *Genetics* **199**, 817–829 (2015).  
293 33. Templeton, A. R., Sing, C. F., Kessling, A. & Humphries, S. A cladistic analysis of phenotype associations with  
294 haplotypes inferred from restriction endonuclease mapping. II. The analysis of natural populations. *Genetics*  
295 **120**, 1145–1154 (1988).  
296 34. Franks, S. J., Sim, S. & Weis, A. E. Rapid evolution of flowering time by an annual plant in response to a climate  
297 fluctuation. *Proceedings of the National Academy of Sciences* **104**, 1278–1282 (2007).  
298 35. Bradshaw, W. E. & Holzapfel, C. M. Genetic response to rapid climate change: it's seasonal timing that matters.  
299 *Mol. Ecol.* **17**, 157–166 (2008).  
300 36. Kim, S. *et al.* ARIA, an *Arabidopsis* arm repeat protein interacting with a transcriptional regulator of abscisic  
301 acid-responsive gene expression, is a novel abscisic acid signaling component. *Plant Physiol.* **136**, 3639–3648  
302 (2004).  
303 37. Li, G. *et al.* The calcium-dependent protein kinase CPK7 acts on root hydraulic conductivity. *Plant Cell Environ.*  
304 **38**, 1312–1320 (2015).  
305 38. Choi, H.-I. *et al.* *Arabidopsis* calcium-dependent protein kinase AtCPK32 interacts with ABF4, a transcriptional  
306 regulator of abscisic acid-responsive gene expression, and modulates its activity. *Plant Physiol.* **139**,  
307 1750–1761 (2005).  
308 39. Barrett, R. D. H. & Schluter, D. Adaptation from standing genetic variation. *Trends Ecol. Evol.* **23**, 38–44 (2008).  
309 40. Dlugosch, K. M. & Parker, I. M. Founding events in species invasions: genetic variation, adaptive evolution, and  
310 the role of multiple introductions. *Mol. Ecol.* **17**, 431–449 (2008).  
311 41. Fu, Q. *et al.* Genome sequence of a 45,000-year-old modern human from western Siberia. *Nature* **514**,  
312 445–449 (2014).  
313



314

## METHODS

315 **Sample collection and DNA sequencing.** Modern *A. thaliana* accessions were from the collection  
316 described by Platt and colleagues<sup>17</sup> which identified HPG1 candidates based on 149 genome-wide SNPs  
317 (Table S1). Herbarium specimens were directly sampled by Max Planck colleagues Jane Devos and  
318 Gautam Shirsekar, or sent to us by collection curators from various herbaria (Table S1). DNA from  
319 herbarium specimens was extracted as described<sup>42</sup> in a clean room facility at the University of Tübingen.  
320 Two sequencing libraries with sample-specific barcodes were prepared following established protocols,  
321 with and without repair of deaminated sites using uracil-DNA glycosylase and endonuclease VIII (refs.  
322 <sup>43–45</sup>) (see Supplementary Online Material [SOM]). DNA from modern individuals was extracted from  
323 pools of eight siblings using the DNeasy plant mini kit (Qiagen, Hilgendorf, Germany). Genomic DNA  
324 libraries were prepared using the TruSeq DNA Sample or TruSeq Nano DNA sample prep kits (Illumina,  
325 San Diego, CA), and sequenced on Illumina HiSeq 2000, HiSeq 2500 or MiSeq instruments. Paired-end  
326 reads from modern samples were trimmed and quality filtered before mapping using the SHORE pipeline  
327 v0.9.0 (ref. <sup>46,47</sup>). Because ancient DNA fragments are short (Fig. S1B), we merged forward and reverse  
328 reads for herbarium samples after trimming, requiring a minimum of 11 bp overlap<sup>48</sup>, and treated the  
329 resulting as single-end reads. Reads were mapped with GenomeMapper v0.4.5s (ref. <sup>49</sup>) against an HPG1  
330 pseudo-reference genome<sup>23</sup>, and against the Col-0 reference genome, and SNPs were called with  
331 SHORE<sup>23,50</sup> using different thresholds. Samples JK2509 to JK2531 were only mapped to the HPG1  
332 pseudo-reference genome. Average coverage depth, number of covered genome positions, and number  
333 of SNPs identified per accession relative to HPG1 are reported in Table S1. We also re-sequenced the  
334 genomes of twelve Col-0 MA lines<sup>50,51</sup> (Table S2).

335 **Phylogenetic methods and genome-wide statistics.** We used four methods to estimate the relationships  
336 among modern accessions, and between modern and herbarium HPG1 samples: (i) multidimensional  
337 scaling (MDS); (ii) construction of a neighbor joining tree with the adegenet package in R (ref. <sup>52</sup>), with  
338 branch support assessed with 1,000 bootstrap iterations and consensus reported; (iii) construction of a  
339 parsimony network using SplitsTree v.4.12.3 (ref. <sup>53</sup>), with confidence values calculated with 1,000  
340 bootstrap iterations; (iv) performing a Bayesian phylogenetic analysis using BEAST v.1.8 (ref. <sup>54</sup>) (see  
341 below).

342 We estimated genetic diversity as Watterson's  $\theta$  (ref. <sup>55</sup>) and nucleotide diversity  $\pi$ , and the  
343 difference between these two statistics as Tajimas's  $D$  (ref. <sup>56</sup>) using DnaSP v5 (ref. <sup>57</sup>). We calculated the  
344 folded site frequency spectrum (SFS) as well as the unfolded SFS, for which we assigned the ancestral  
345 state using the *A. lyrata* genome<sup>58</sup>. We estimated pairwise linkage disequilibrium (LD) between all  
346 possible combinations of informative sites, ignoring singletons, by computing  $r^2$ ,  $D$  and  $D'$  statistics. For  
347 the modern individuals, we calculated the recombination parameter  $\rho$  ( $4N_e r$ ) and performed the  
348 four-gamete-test<sup>59</sup> to identify the minimum number of recombination events. All LD and recombination  
349 related statistics were determined using DnaSP v5 (ref. <sup>57</sup>) (see SOM).

350 **Substitution and mutation rate analyses.** We used genome-wide nuclear SNPs to calculate pairwise  
351 "net" genetic distances using the equation  $D'_{ij} = D_{ic} - D_{jc}$ , where  $D'_{ij}$  is the net distance between a modern  
352 sample  $i$  and a herbarium sample  $j$ ;  $D_{ic}$  the distance between the modern sample  $i$  and the reference

353 genome  $c$ ; and  $D_{jc}$  is the distance between a modern sample ( $j$ ) and the reference genome ( $c$ ). We  
354 calculated a pairwise time distance in years between the collection times,  $T_{ij}$ , and calculated the linear  
355 regression:  $D' = a + bT'$ . The slope coefficient  $b$  describes the number of substitution changes per year. We  
356 used either all SNPs or subsets of SNPs at different annotations (genic, intergenic etc.) appropriately  
357 scaled by accessible genome length and with confidence intervals determined by bootstrap (see SOM  
358 and Fig. S3).

359 The second approach used Bayesian phylogenetics with the tip-calibration method implemented  
360 in BEAST v1.8 (ref. <sup>54</sup>). Our analysis optimized simultaneously and in an iterative fashion using a Monte  
361 Carlo Markov Chain (MCMC) a tree topology, branch length, substitution rate, and a demographic Skygrid  
362 model (Fig. 3 A,B; see SOM). The demographic model is a Bayesian nonparametric one that is optimized  
363 for multiple loci and that allows for complex demographic trajectories by estimating population sizes in  
364 time bins across the tree based on the number of coalescent - branching - events per bin (ref. <sup>60</sup>). We  
365 also performed a second analysis run using a fixed prior for substitution rate of  $3 \times 10^{-9}$  substitutions  
366 site<sup>-1</sup> year<sup>-1</sup> based on our previous net distance estimate to confirm that the MCMC had the same  
367 parameter convergence, e.g. tree topology, as in the first “estimate-all-parameters” run.

368 **Inference of genome-wide selection.** We separately analyzed sequences at different annotations, since  
369 certain regions should be under a different selection regime (less evolutionary constraint) than  
370 others. We compared the means and confidence intervals of substitution rates in the entire genome and  
371 in intergenic regions for both datasets, HPG1 population and laboratory Col-0 MA lines. Only within the  
372 HPG1 population, we also tested for an interaction between low and common allele frequency  
373 polymorphisms and putatively selected and putatively neutral annotations (comparisons: entire genome  
374 - intergenic, genic - intergenic, nonsynonymous - synonymous). The formal test was Fisher exact test and  
375 low and common frequency SNPs were defined in all possible cutoffs from 1 to 45% allele frequency (Fig.  
376 S5). The signal captured is based on the assumption that purifying selection is more efficient at  
377 intermediate frequencies, pushing deleterious variants towards lower frequency in the spectrum.

378 **Association analyses and dating of new mutations.** We collected flowering, seed and root morphology  
379 phenotypes for 63 accessions. For associations with climate parameters, we followed a similar rationale  
380 as described<sup>61</sup>. We extracted information from the bioclim database  
381 (<http://www.worldclim.org/bioclim>) at a 2.5 degrees resolution raster and intersected it with geographic  
382 locations of HPG1 samples ( $n = 100$ ). We performed association analyses under several models and  
383  $p$ -value corrections using the R package GeneABEL (ref. <sup>62</sup>), with phenotypes and climatic variables as  
384 response variables and SNPs as explanatory variables; appropriately correcting for covariates. Resulting  
385  $p$ -values were adjusted with an empirical  $p$ -value distribution generated from 1,000 permuted datasets,  
386 or with a double Bonferroni correction:  $5\% / (\text{number of SNPs} + \text{number of phenotypes tested})$ .

387 **Accession numbers.** Short reads have been deposited in the European Nucleotide Archive under the  
388 accession number XXXXX.

389

## 390 METHODS REFERENCES

391 42. Yoshida, K. *et al.* The rise and fall of the *Phytophthora infestans* lineage that triggered the Irish potato famine.

- 392 *Elife* **2**, e00731 (2013).
- 393 43. Meyer, M. & Kircher, M. Illumina sequencing library preparation for highly multiplexed target capture and  
394 sequencing. *Cold Spring Harb. Protoc.* **2010**, db.prot5448 (2010).
- 395 44. Briggs, A. W. *et al.* Removal of deaminated cytosines and detection of in vivo methylation in ancient DNA.  
396 *Nucleic Acids Res.* **38**, e87 (2010).
- 397 45. Kircher, M. in *Ancient DNA* (eds. Shapiro, B. & Hofreiter, M.) 197–228 (Humana Press, 2011).
- 398 46. Hagmann, J. *et al.* Century-scale Methylome Stability in a Recently Diverged *Arabidopsis thaliana* Lineage. *PLoS*  
399 *Genet.* **11**, e1004920–e1004920 (2015).
- 400 47. Ossowski, S. *et al.* Sequencing of natural strains of *Arabidopsis thaliana* with short reads. *Genome Res.* **18**,  
401 2024–2033 (2008).
- 402 48. Yoshida, K. *et al.* The rise and fall of the *Phytophthora infestans* lineage that triggered the Irish potato famine.  
403 *eLife* **2**, e00731 (2013).
- 404 49. Schneeberger, K. *et al.* Simultaneous alignment of short reads against multiple genomes. *Genome Biol.* **10**, R98  
405 (2009).
- 406 50. Becker, C. *et al.* Spontaneous epigenetic variation in the *Arabidopsis thaliana* methylome. *Nature* **480**,  
407 245–249 (2011).
- 408 51. Shaw, R. G., Byers, D. L. & Darms, E. Spontaneous mutational effects on reproductive traits of *Arabidopsis*  
409 *thaliana*. *Genetics* **155**, 369–378 (2000).
- 410 52. Jombart, T. adegenet: a R package for the multivariate analysis of genetic markers. *Bioinformatics* **24**,  
411 1403–1405 (2008).
- 412 53. Huson, D. H. & Bryant, D. Application of phylogenetic networks in evolutionary studies. *Mol. Biol. Evol.* **23**,  
413 254–267 (2006).
- 414 54. Drummond, A. J., Suchard, M. A., Xie, D. & Rambaut, A. Bayesian phylogenetics with BEAUti and the BEAST  
415 1.7. *Mol. Biol. Evol.* **29**, 1969–1973 (2012).
- 416 55. Watterson, G. A. On the number of segregating sites in genetical models without recombination. *Theor. Popul.*  
417 *Biol.* **7**, 256–276 (1975).
- 418 56. Tajima, F. Statistical method for testing the neutral mutation hypothesis by DNA polymorphism. *Genetics* **123**,  
419 585–595 (1989).
- 420 57. Librado, P. & Rozas, J. DnaSP v5: a software for comprehensive analysis of DNA polymorphism data.  
421 *Bioinformatics* **25**, 1451–1452 (2009).
- 422 58. Hu, T. T. *et al.* The *Arabidopsis lyrata* genome sequence and the basis of rapid genome size change. *Nat. Genet.*  
423 **43**, 476–481 (2011).
- 424 59. Hudson, R. R. & Kaplan, N. L. Statistical properties of the number of recombination events in the history of a  
425 sample of DNA sequences. *Genetics* **111**, 147–164 (1985).
- 426 60. Gill, M. S. *et al.* Improving Bayesian population dynamics inference: a coalescent-based model for multiple  
427 loci. *Mol. Biol. Evol.* **30**, 713–724 (2012).
- 428 61. Hancock, A. M. *et al.* Adaptation to climate across the *Arabidopsis thaliana* genome. *Science* **334**, 83–86  
429 (2011).
- 430 62. Aulchenko, Y. S., Ripke, S., Isaacs, A. & van Duijn, C. M. GenABEL: an R library for genome-wide association  
431 analysis. *Bioinformatics* **23**, 1294–1296 (2007).

432

433

434 **FIGURE LEGENDS**

435 **Figure 1. Geographic location and temporal distribution of HPG1 samples.**

436 **(A)** Sampling location of herbarium (blue) and modern individuals (green). **(B)** Temporal distribution of  
437 samples (random vertical jitter for visualization purposes). Stars indicate four herbarium accessions that  
438 nest within the clade of modern accessions (see Fig. 3). **(C)** Linear regression of latitude and longitude as  
439 a function of collection year (p-value of the slope and Pearson correlation coefficient are indicated)

440 **Figure 2. Relationship among herbarium and modern HPG1 samples.**

441 **(A)** Neighbor joining tree, consensus of 1,000 bootstrap replicates. Branch lengths indicate number of  
442 base substitutions (colors represent herbarium (blue) and modern individuals (green)). Scale line shows  
443 the equivalent branch length of 80 nucleotide changes. Note that no outgroup was included. **(B)** First  
444 two dimensions of a multidimensional scaling plot based on pairwise identity-by-state distances. Fraction  
445 of variance explained given in parentheses. **(C, D)** Network of all samples using the parsimony splits  
446 algorithm, before **(C)** and after **(D)** removing intra-HPG1 recombinants (in red).

447 **Figure 3. Substitution rates and demographic history.**

448 **(A)** Bayesian phylogenetic analyses employing the tip calibration methodology. A total of 10,000 trees  
449 were superimposed as transparent lines, and the most common topology was plotted solidly. Tree  
450 branches were calibrated with their corresponding collection dates. **(B)** Maximum Clade Credibility  
451 (MCC) tree summarizing the trees in (A). The demographic model underlying the phylogenetic analysis,  
452 Bayesian Skygrid reconstruction, is superimposed; the mean  $N_e$  over time is shown as a dotted line and  
453 the 95% HPD is shaded grey. Note the scale line shows the equivalent branch length of 50 nucleotide  
454 changes. **(C)** Regression between pairwise net genetic and time distances. The slope of the linear  
455 regression line corresponds to the genome substitution rate per year. **(D)** Substitution spectra in HPG1  
456 samples, compared to greenhouse-grown mutation accumulation (MA) lines. **(E)** Comparison of  
457 genome-wide, intergenic, intronic, and genic substitution rates in HPG1 and mutation rates in  
458 greenhouse-grown MA lines. Substitution rates for HPG1 were re-scaled to a per generation basis  
459 assuming different generation times. Confidence intervals in HPG1 substitution rates were obtained from  
460 95% confidence intervals of the slope from 1,000 bootstrap (see Table S4 for actual values).

461 **Table 1. Genic SNPs associated with different traits.**

462 Most SNPs first appeared in sample JK2530 collected 1922 in Indiana. For non-synonymous SNPs, the  
463 amino acid change and the Grantham score (ranging from 0 to 215), which measures the  
464 physico-chemical properties of the amino acids, are reported. All SNPs in the table were significant ( $p <$   
465 0.05) after raw p-values were corrected by an empirical p-value distribution from a permutation  
466 procedure. \* highlights those that also passed a double Bonferroni threshold, correcting by number of  
467 SNPs and number of phenotypes ( $p < 0.0001$ ). LD corresponds to how many other SNP hits are in high

468 linkage ( $r^2 > 0.5$ ). See Table S5 for information on all significant SNPs and Table S4 for details on  
469 phenotypes and climatic variables.

470



471

472 **Figure 1**

473

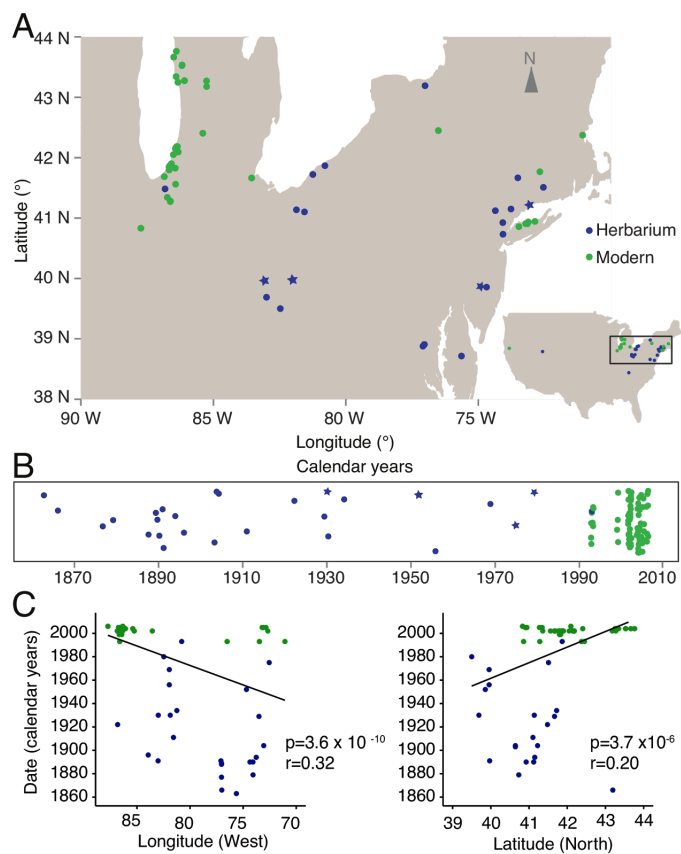

474

475 **Figure 2**

476

477

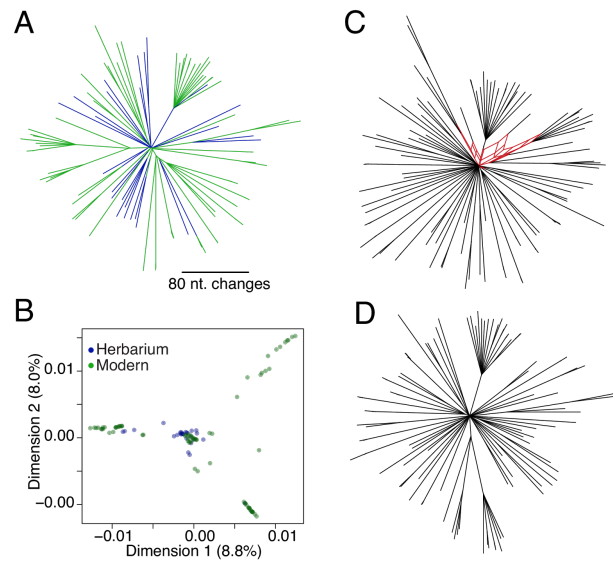

478

479

**Figure 3**

480

481

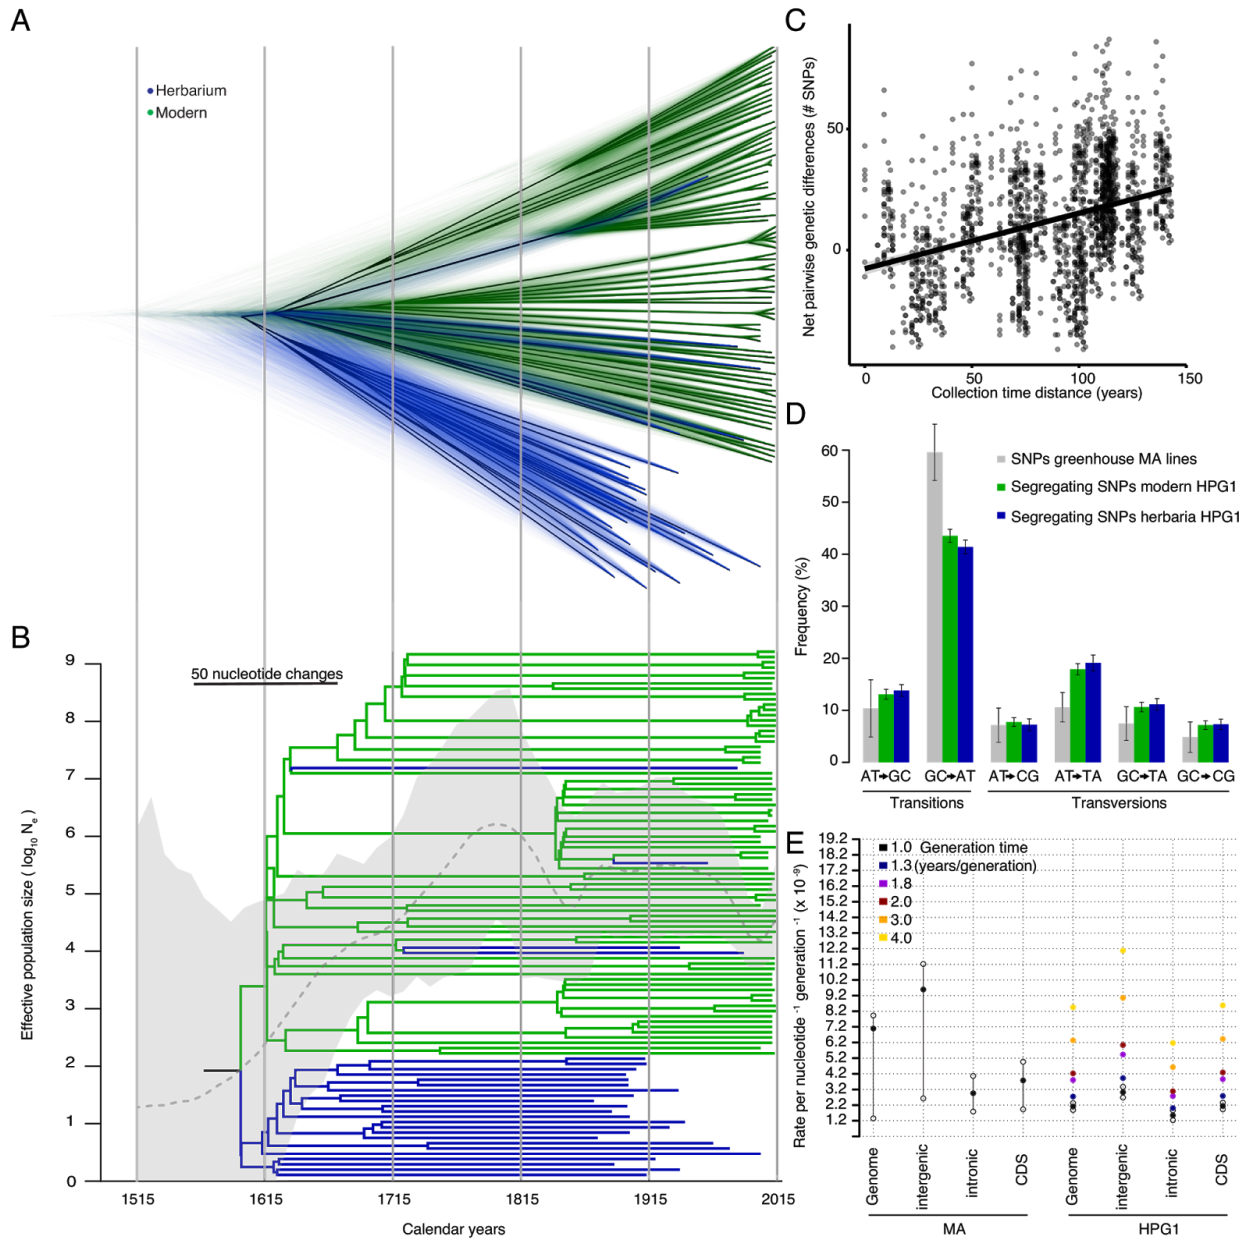

482

483

484

**Table 1**

485

| Trait <sup>†</sup> | Location (chr-bp) | Gene      | Anno-tation | Protein                                     | aa change | LD | Bonf. |
|--------------------|-------------------|-----------|-------------|---------------------------------------------|-----------|----|-------|
| G                  | 1-958,948         | AT1G03810 | nonsyn      | Oligonucleotide/<br>oligosaccharide binding | A>P, 27   | 53 |       |
| D                  | 1-13,994,958      | AT1G36933 | transposon  | Copia                                       |           | 49 |       |
| S                  | 1-20,324,050      | AT1G54440 | intronic    | RRP6-LIKE 1                                 |           | 11 | *     |
| D                  | 1-23,648,407      | AT1G63740 | nonsyn      | TIR-NLR family                              | Y>S, 144  | 46 |       |
| G                  | 2-358,395         | AT2G01820 | syn         | RLK family                                  |           | 43 | *     |
| G                  | 2-585,918         | AT2G02220 | syn         | PSKR1                                       |           | 42 | *     |
| G                  | 2-6,034,545       | AT2G14247 | syn         | Expressed protein                           |           | 38 | *     |
| G                  | 2-7,047,529       | AT2G16270 | nonsyn      | Unknown protein                             | P>A, 27   | 37 | *     |
| G                  | 2-7,186,220       | AT2G16580 | intronic    | SAUR8                                       |           | 36 | *     |
| G                  | 2-10,495,275      | AT2G24680 | intronic    | B3 family                                   |           | 34 | *     |
| G                  | 2-12,415,084      | AT2G28900 | intronic    | OEP16                                       |           | 32 |       |
| S                  | 2-16,039,488      | AT2G38290 | 3' UTR      | AMT2                                        |           | 8  | *     |
| S                  | 2-16,247,290      | AT2G38910 | nonsyn      | CPK20                                       | A>G, 60   | 7  | *     |
| G                  | 2-16,333,662      | AT2G39160 | nonsyn      | Unknown protein                             | A>G, 60   | 29 |       |
| G                  | 3-2,500,258       | AT3G07830 | syn         | PGA3                                        |           | 28 | *     |
| G                  | 3-3,629,794       | AT3G11530 | intronic    | VPS55                                       |           | 26 | *     |
| G                  | 3-4,269,626       | AT3G13229 | 5' UTR      | DUF868 domain                               |           | 25 | *     |
| D                  | 3-11,873,293      | AT3G30219 | transposon  | Gypsy                                       |           | 0  |       |
| G & D              | 4-4,228,138       | AT4G07440 | transposon  | Oligonucleotide/<br>oligosaccharide binding |           | 19 |       |
| G & D              | 4-9,046,942       | AT4G15960 | nonsyn      | Alpha/beta-hydrolase<br>superfamily         | A>Q, 24   | 18 |       |
| G & D              | 4-15,646,341      | AT4G32410 | syn         | ANY1                                        |           | 15 |       |
| G                  | 4-15,845,001      | AT4G32840 | 3' UTR      | PFK6                                        |           | 14 |       |
| D                  | 5-4,245,213       | AT5G13260 | syn         | Unknown protein                             |           | 12 |       |
| D                  | 5-4,500,202       | AT5G13950 | nonsyn      | Unknown protein                             | A>G, 60   | 11 |       |
| G                  | 5-4,797,923       | AT5G14830 | transposon  | Retrotransposon                             |           | 10 |       |
| G                  | 5-6,508,329       | AT5G19330 | nonsyn      | ARIA                                        | C>W, 215  | 0  |       |
| G                  | 5-11,090,365      | AT5G29037 | transposon  | Gypsy                                       |           | 4  |       |
| G                  | 5-12,312,975      | AT5G32630 | pseudogene  | –                                           |           | 3  |       |
| G                  | 5-12,358,159      | AT5G32825 | transposon  | CACTA                                       |           | 2  |       |
| S                  | 5-16,024,197      | AT5G40020 | intronic    | Thaumatococcus superfamily                  |           | 2  | *     |

<sup>†</sup>Traits with significant associations were root gravitropism (G), root size (S), or summer precipitation, related to drought conditions.

1 **Supplementary Information Guide for**

2 **Exposito-Alonso, Becker et al.: THE RATE AND EFFECT OF *DE NOVO* MUTATIONS IN A**  
3 **COLONIZING LINEAGE OF *ARABIDOPSIS THALIANA***

|    |                                                                                     |    |
|----|-------------------------------------------------------------------------------------|----|
| 5  | <b>SUPPLEMENTAL TEXT</b>                                                            | 3  |
| 6  | 1. Sample collection and preparation                                                | 3  |
| 7  | 2. Authenticity of aDNA                                                             | 3  |
| 8  | 3. SNP calling thresholds                                                           | 3  |
| 9  | 4. Resequencing of Col-0 Mutation Accumulation lines                                | 3  |
| 10 | 5. Identification of bona fide HPG1 accessions and mutations                        | 4  |
| 11 | 6. Extent of linkage disequilibrium and recombination                               | 5  |
| 12 | 7. Substitution and mutation rate analyses                                          | 5  |
| 13 | 7.1 Greenhouse grown MA lines                                                       | 5  |
| 14 | 7.2 Natural populations of HPG1                                                     | 5  |
| 15 | 7.2.1 Net distances                                                                 | 5  |
| 16 | 7.2.2 Bayesian tip-calibration                                                      | 6  |
| 17 | 7.2.3 Methylation status of mutated sites                                           | 6  |
| 18 | 8. Inference of genome-wide selection                                               | 7  |
| 19 | 9. Demography and migration of HPG1                                                 | 8  |
| 20 | 9.1 Skygrid coalescent                                                              | 8  |
| 21 | 9.2. Phylogeography                                                                 | 9  |
| 22 | 9.3. Isolation by distance                                                          | 9  |
| 23 | 10. Phenotypic association analyses and dating of newly arisen mutations            | 9  |
| 24 | 10.1. Phenotyping                                                                   | 9  |
| 25 | 10.1.1 Root                                                                         | 9  |
| 26 | 10.1.2 Seed size                                                                    | 9  |
| 27 | 10.1.3 Flowering in the growth chamber                                              | 10 |
| 28 | 10.1.4 Fecundity in the field                                                       | 10 |
| 29 | 10.2 Quantitative genetic analyses                                                  | 11 |
| 30 | 10.2.1 Heritability                                                                 | 11 |
| 31 | 10.2.2 Linear Models                                                                | 11 |
| 32 | 10.2.3 Evaluation of significance                                                   | 12 |
| 33 | 10.2.4 Context of de novo mutations associated with phenotypes                      | 12 |
| 34 | 10.2.5 Functional information                                                       | 12 |
| 35 | 10.2.6 Proof of concept examples                                                    | 13 |
| 36 | <b>REFERENCES</b>                                                                   | 13 |
| 37 | <b>SUPPLEMENTAL FIGURES</b>                                                         | 17 |
| 38 | Figure S1. Ancient-DNA-like characteristics of unrepaired herbarium libraries.      | 17 |
| 39 | Figure S2. Separation between HPG1 and other North American lineages.               | 18 |
| 40 | Figure S3. Substitution spectrum and rates.                                         | 19 |
| 41 | Figure S4. Relationship between methylation and substitutions.                      | 21 |
| 42 | Figure S5. Enrichment of low variants at putatively selected annotations.           | 23 |
| 43 | Figure S6. Phylogeographic inference in HPG1.                                       | 24 |
| 44 | Figure S7. Density of SNPs along all chromosomes and location of SNP hits.          | 26 |
| 45 | Figure S8. Spatial and temporal emergence of root-associated mutations.             | 27 |
| 46 | Figure S9. Linkage disequilibrium between SNPs with significant trait associations. | 28 |
| 47 | Figure S10. Correlations of SNP effects and p-values with frequency and age.        | 29 |
| 48 | <b>SUPPLEMENTAL TABLES</b>                                                          | 30 |



bioRxiv preprint doi: <https://doi.org/10.1101/050203>; this version posted November 22, 2016. The copyright holder for this preprint (which was not certified by peer review) is the author/funder, who has granted bioRxiv a license to display the preprint in perpetuity. It is made available under aCC-BY-NC-ND 4.0 International license.

## SUPPLEMENTAL TEXT

### 1. Sample collection and preparation

Seeds from modern accessions (Table S1) were bulked at the University of Chicago. Progeny for DNA extraction was grown at the Max Planck Institute for Developmental Biology. We used 2 to 8 mm<sup>2</sup> of dried tissue for destructive sampling from the herbarium specimens (Table S1).

### 2. Authenticity of aDNA

First, unrepaired sequencing herbarium libraries were screened for authenticity by sequencing at low coverage on Illumina HiSeq 2500 or MiSeq instruments. To verify the DNA retrieved from historical samples of *A. thaliana* was authentic, we checked the percentage of endogenous DNA of the sample (Fig. S1A) as well as typical postmortem DNA damages: high fragmentation of DNA (Fig. S1B), enrichment of substitution from C to T at the first base pair (Fig. S1C) as well as purine enrichment at breakpoints of DNA fragments (Fig. S1D) (for details see <sup>1</sup>). Sequencing to produce the final genomes (101 bp paired end) was carried out on an Illumina HiSeq 2000 instrument after DNA repair by uracil-DNA glycosylase<sup>2-4</sup>.

### 3. SNP calling thresholds

To assess the effect of SNP calling thresholds on the mutation rate, we employed three different SHORE v0.9.0 quality thresholds following previous work (see Table S4 from ref. <sup>5</sup>): allowing at most one intermediate penalty in all strains (most stringent threshold; “32-32”); requesting that at least one strain had at most one intermediate penalty, while all others were allowed up to two high and one intermediate penalties (intermediate stringency, “32-15”); and finally allowing one high and one intermediate penalty for all strains (most lenient stringency, “24-24”). On top of that, we would either allow missing information per SNP in up to 50% of accessions, or request complete information (0% missing rate). Thus, the most rigorous case would be 32-32 quality and 0% missing rate, and the most relaxed 24-24 quality and 50% maximum missing rate. Substitution rate calculations (section 7.2) were done for datasets from all combinations of these quality parameters (Fig. S3), and we chose the regular 32\_15 quality threshold and complete information for the final estimate (Fig 3 C, E).

### 4. Resequencing of Col-0 Mutation Accumulation lines

We also sequenced the genomes of twelve greenhouse-grown mutation accumulation (MA) lines, including ten that had been sequenced at lower coverage before<sup>5,6</sup> (Table S2). We called SNPs, indels and structural variants (SVs), following the workflow and parameters described<sup>7</sup>, but without iterations. This procedure resulted in 2,203 polymorphisms shared by all lines, indicating errors in the

bioRxiv preprint doi: <https://doi.org/10.1101/050203>; this version posted November 22, 2016. The copyright holder for this preprint (which was not certified by peer review) is the author/funder, who has granted bioRxiv a license to display the preprint in perpetuity. It is made available under aCC-BY-NC-ND 4.0 International license.

84 reference sequence (12% of variants replaced N's in the TAIR9 genome) or genetic differences in the  
85 founder plant of the MA population compared to the Col-0 reference genome. In addition, we  
86 identified 388 segregating variants across the twelve lines (Table S2), of which 350 were singletons.  
87 This analysis revealed on average 25.5 SNPs, 4.9 deletions and 3.2 insertions per MA line at the 31<sup>st</sup>  
88 generation (Table S2), compared to 19.6 SNPs, 2.4 deletions and 1.0 insertions previously detected in  
89 the 30<sup>th</sup> generation with shorter read length and lower read depth<sup>8</sup>. The genome length accessed in  
90 this sequencing effort, 115,954,227 bp, was used to scale the number of point mutations to a rate of  
91  $7.1 \times 10^{-9}$  mutations site<sup>-1</sup> generation<sup>-1</sup> (Table S3, Fig. 3E).

## 93 5. Identification of *bona fide* HPG1 accessions and mutations

94 Before we could work with the colonizer group HPG1, we needed to carefully identify individuals that  
95 belong to other haplogroups or that have introgressions from them. We established the relationships  
96 among all samples at three levels of resolution: (i) the 149 nuclear SNPs used originally to define the  
97 HPG1 haplogroup in a global screening<sup>9</sup> (Fig. S2A), (ii) SNPs in the chloroplast genome (where we did  
98 not find any variants within HPG1), (iii) and all nuclear genome SNPs (Fig. S2B-C). At these three  
99 levels we performed a multidimensional scaling (MDS) analysis and built a neighbor-joining tree  
100 using the adegenet package in R (ref. <sup>10</sup>).

101 Having identified these *bona fide* HPG1 individuals, we wanted to confirm that the diversity  
102 has a legitimate origin from *de novo* mutations. For that we used the 1001 Genomes resource  
103 (1001genomes.org) to verify that the majority of HPG1-specific variants did not originate in the  
104 native Eurasian range. Subsetting the genomes from this resource to only European accessions, and  
105 limiting the SNP set to those with  $\geq 1\%$  frequency of alternative alleles, there were 338 variants out of  
106 all 5,181 HPG1 variants that were also found in Europe or Asia (6%). Only one of the reported SNPs  
107 associated with phenotypes (see section 10) was among these shared variants.

108 There are several scenarios that can explain these shared SNPs. One is that some HPG1  
109 individuals were moved back to Europe by humans. Another one is that parallel mutations occurred  
110 in North America and Eurasia or that a reversion-mutation happened in some HPG1 individuals.  
111 Given that 10% of all sites in the genome are variable in the 1001 Genomes collection, this is not an  
112 implausible scenario for at least a fraction of shared SNPs. Two additional scenarios involve an origin  
113 from standing European variation: (1) the shared variants come from small introgression events that  
114 passed our filters above, or (2) the bottleneck was not complete, and while it left no diversity in the  
115 chloroplast genome, a few hundred SNPs were passed on in the nuclear genome (given the low  
116 number of variants, the colonizers could have been as many as two dozen seeds)

bioRxiv preprint doi: <https://doi.org/10.1101/050203>; this version posted November 22, 2016. The copyright holder for this preprint (which was not certified by peer review) is the author/funder, who has granted bioRxiv a license to display the preprint in perpetuity. It is made available under aCC-BY-NC-ND 4.0 International license.

117

## 118 **6. Extent of linkage disequilibrium and recombination**

119 We estimated pairwise linkage disequilibrium (LD) between all possible combinations of informative  
120 sites, ignoring singletons, by computing  $r^2$ ,  $D$  and  $D'$  statistics. LD decay was estimated using a linear  
121 regression approach. Linkage disequilibrium parameter  $D'$  did not decay with physical distance  
122 (intercept = 0.99, slope = 0.00,  $p < 0.0001$ ) among all SNP pairs. Furthermore, only 0.02% of the  
123 nonsingleton SNP pairs were not in complete linkage disequilibrium ( $D' < 1$ ), indicating extensive  
124 linkage between chromosomes. We also formally estimated recombination within HPG1. The  
125 estimate was much lower ( $4N_e r = \rho = 3.0 \times 10^{-6}$  cM bp<sup>-1</sup>) than for a similar-sized collection of diverse  
126 *A. thaliana* individuals from the native range<sup>11</sup> ( $\rho = 7.5 \times 10^{-2}$  cM bp<sup>-1</sup>). The four-gamete test<sup>12</sup>,  
127 which determines whether all four possible gametes (ab, aB, Ab, AB) are observed for two  
128 segregating loci, revealed that all configurations of SNPs could be explained with as few as 38  
129 recombination events for the 100 genomes. We argue that this number of potential recombination  
130 events is sufficiently small to use phylogenetic methods with the 100 HPG1 genomes, even though  
131 such methods are normally not appropriate for genome-wide analyses. Indeed, other sources of  
132 failure of the four-gamete test and the violation of phylogenetic assumptions could be sequencing  
133 errors, or lineage sorting of segregating sites from the ancestral population. LD and recombination  
134 related statistics were determined using DnaSP v5 (ref. <sup>13</sup>) or plink v1.90b2n (ref. <sup>14</sup>).

135

## 136 **7. Substitution and mutation rate analyses**

### 137 7.1 Greenhouse grown MA lines

138 Mutation rates were estimated for each 31<sup>st</sup> generation greenhouse-grown MA line<sup>5</sup> as the number  
139 of mutations divided by the total bp length of the genome (or a given annotation) and by 31  
140 generations (the two MA lines with only three generations were excluded from this analysis). Mean  
141 and confidence intervals across lines are reported (Table S3). The genome length was determined as  
142 all base pairs with coverage higher or equal to 3, and a SHORE mapping quality score of at least 32 in  
143 one sample (Table S2).

144

### 145 7.2 Natural populations of HPG1

#### 146 7.2.1 Net distances

147 For the “net genetic distances” method, we computed confidence intervals of the  $b$  regression slope  
148 coefficient ( $D' = a + bT'$ ) using a bootstrap with replacement of 1,000 samples to avoid over-confident  
149 confidence intervals due to lack of independence of points<sup>15</sup>. We used either all SNPs or SNPs at  
150 specific annotations to calculate different substitution rates and scaled the slope into a per-base rate  
151 using all positions (of the given annotation) that passed alternative or reference call quality

bioRxiv preprint doi: <https://doi.org/10.1101/050203>; this version posted November 22, 2016. The copyright holder for this preprint (which was not certified by peer review) is the author/funder, who has granted bioRxiv a license to display the preprint in perpetuity. It is made available under aCC-BY-NC-ND 4.0 International license.

152 thresholds rather than using a single value of genome length (Table S3). For all annotations we  
153 calculated substitution rates with three quality thresholds and either full information per SNP or  
154 allowing a maximum of 50% missing accessions per SNP (see section 3 and Fig. S3C). For some  
155 annotations substitution rates were not reliable. For instance, in 3' and 5' UTR regions, we did not  
156 have enough mutations (on average ~1 SNP difference between any pair), and thus do not report  
157 these regions' rates. Transposons showed unstable substitution rate estimates that we attribute to  
158 structural variation relative to the reference genome. This likely decreased our ability to map  
159 transposon reads correctly and subsequently call SNPs<sup>16</sup>. In contrast, in the MA dataset, transposon  
160 structural variation was probably fairly low since only 31 generation separate the Col-0 reference  
161 genome with each of the ten derived MA lines. This can be the reason that the number of  
162 transposon SNPs identified in the MA dataset is proportionally larger than in HPG1 (Table S2 and S3).  
163 Therefore, transposon substitution rates in HPG1 cannot be trusted.

### 165 7.2.2 Bayesian tip-calibration

166 For the second approach to estimate a substitution rate, the Bayesian phylogenetics tip-calibration  
167 approach, we performed systematic runs and chain convergence assessments of different  
168 demographic and molecular clock models. We found the Skygrid demographic model<sup>17</sup> and the  
169 lognormal relaxed molecular clock<sup>18 18</sup> the most appropriate models. Under a relaxed molecular  
170 clock, the substitution rate is allowed to vary across branches with a lognormal distribution. The prior  
171 used for molecular clock was a Continuous-Time Markov Chain (CTMC)<sup>17,19</sup>. The analysis was carried  
172 out remotely at CIPRES PORTAL (v3.1 [www.phylo.org](http://www.phylo.org)) using uninformative priors. The run took about  
173 1,344 CPU hours and performed 1,000 million steps in a Monte Carlo Markov Chain (MCMC),  
174 sampling every 100,000 steps. Burn-in was adjusted to 10% of the steps. To visualize the tree output  
175 we produced a Maximum Clade Credibility (MCC) tree with a minimum posterior probability  
176 threshold of 0.8 and a 10% burn-in using TreeAnnotator (part of BEAST package), and visualized the  
177 MCC tree using FigTree ([tree.bio.ed.ac.uk/software/figtree/](http://tree.bio.ed.ac.uk/software/figtree/)) (Fig. 3B). Additionally, we used  
178 DensiTree<sup>20</sup> to simultaneously draw the 10,000 BEAST trees with the highest posterior probability  
179 (Fig. 3A). Since all trees were drawn transparently, agreements in both topology and branch lengths  
180 appear as densely colored regions, while areas with little agreement appear lighter.

### 182 7.2.3 Methylation status of mutated sites

183 As in many other species, the spectrum of *de novo* mutations in the greenhouse-grown *A. thaliana*  
184 MA lines is biased towards G:C→A:T transitions<sup>8</sup>, leading to an inflated transition-to-transversion  
185 ratio (Ts/Tv). This bias is less pronounced in recent mutations in a Eurasian collection of natural  
186 accessions<sup>21</sup> and in HPG1 accessions (Fig. 3D). A recent multigenerational salt stress experiment in

bioRxiv preprint doi: <https://doi.org/10.1101/050203>; this version posted November 22, 2016. The copyright holder for this preprint (which was not certified by peer review) is the author/funder, who has granted bioRxiv a license to display the preprint in perpetuity. It is made available under aCC-BY-NC-ND 4.0 International license.

187 the greenhouse also showed a more balanced Ts/Tv (ref. <sup>23</sup>). These findings indicate that less benign  
188 conditions might promote a lower Ts/Tv, and one possible cause are methylation patterns, known to  
189 change under different environments<sup>23</sup>.

190 We interrogated the potential evolutionary role of cytosine methylation in the mutability of  
191 cytosine bases in the HPG1 accessions. For reference DNA methylation data, we used previously  
192 generated bisulfite-sequencing data of HPG1 strains<sup>7</sup> and of Col-0 MA lines<sup>5</sup>, respectively. For both  
193 datasets, methylation status was calculated as the fraction of reads with methylated cytosines by the  
194 total number of reads at a certain cytosine position in the genome. Our rationale was that if  
195 methylation affected mutability, the degree of methylation at positions where we find a new mutation  
196 should be higher. To be sure that a given site in HPG1 was a new mutation, we only considered  
197 positions for which we could determine that state by alignment to the *A. lyrata* genome<sup>24</sup>. The  
198 “tested sites” were positions in HPG1 that had a mutation both from *A. lyrata* and *A. thaliana* Col-0.  
199 These positions can be of two kinds, “fixed” if all HPG1 individuals carry the alternative, or  
200 “segregating” if both reference and alternative alleles exist in HPG1. As control, “control set”, we  
201 used cytosine positions that did not vary across HPG1, *A. lyrata* and *A. thaliana*. To produce the  
202 methylation distribution of the control set we randomly chose 1,000 invariant cytosine positions. For  
203 the test sets, we averaged the methylation degree and compared it with the control distribution.

204 Ancestral cytosines with higher methylation in both *A. thaliana* Col-0 reference and HPG1  
205 pseudo-reference methylome datasets were more likely to mutate to thymines in HPG1 (Fig. S4 A-D).  
206 Additionally, the methylation degree at substitutions inside genes was higher in the HPG1  
207 methylome (Fig. S4 B,D). While some C→T changes could be explained by higher spontaneous  
208 deaminations known to happen more often at methylated cytosines, also C→A/G substitutions were  
209 more likely to have been methylated. If this process is common enough, the Ts/Tv ratio should  
210 decrease. We are far from understanding differences in Ts/Tv in natural and controlled conditions,  
211 but definitely methylation status seems to have a strong statistical connection with mutability.

## 212

### 213 **8. Inference of genome-wide selection**

214 Since we observed differences between the two mutation accumulation (MA) datasets (the  
215 laboratory Col-0 MA lines and the wild HPG1 lines), we tried to infer selection based on differences in  
216 polymorphisms and substitution rates. We compared the different substitution rates and the 95%  
217 bootstrap confidence intervals to assess how identical they were (Table S3). Genome-wide  
218 substitution rate in the HPG1 dataset was significantly lower than that in controlled greenhouse  
219 conditions, even after correcting by the mean generation time of 1.3 years<sup>25</sup> (Table S3). However,  
220 these differences could be due to differences in individual genomic annotations. For instance, coding  
221 regions and introns were virtually identical between the two datasets, but transposons and



bioRxiv preprint doi: <https://doi.org/10.1101/050203>; this version posted November 22, 2016. The copyright holder for this preprint (which was not certified by peer review) is the author/funder, who has granted bioRxiv a license to display the preprint in perpetuity. It is made available under aCC-BY-NC-ND 4.0 International license.

222 intergenic were much lower in HPG1. Furthermore, if the true generation time is about 2-3 years (Fig.  
 223 3), differences in the mentioned annotations would also disappear. Therefore, we tried to investigate  
 224 the existence of purifying selection based on frequency equilibriums only within the HPG1  
 225 population. We did comparisons between pairs of annotation categories and between pairs of  
 226 frequency classes (i.e., low and common). In this way, genome-wide, genic and non-synonymous  
 227 polymorphisms were compared to matched putatively neutral annotations: intergenic and  
 228 synonymous sites (Fig. S5). We tested for an interaction using a Fisher's Exact test on 2x2 table  
 229 counts as:

230

|                                     |                                        |
|-------------------------------------|----------------------------------------|
| Neutral annotation & low frequency  | Neutral annotation & common frequency  |
| Selected annotation & low frequency | Selected annotation & common frequency |

235

236 Because any frequency cut-off is arbitrary, we computed the test with all cutoffs from 0 to  
 237 50% frequencies in 1% steps (Fig. S5). This test, which resembles in concept the MK or HKA tests,  
 238 evidences that there is a depletion of common frequency polymorphisms, which are more exposed  
 239 to selection, at the three putatively selected genomic levels compared to control (quasi-neutral)  
 240 regions: genome-wide, genes and nonsynonymous sites.

241

## 242 **9. Demography and migration of HPG1**

### 243 9.1 Skygrid coalescent

244 From the Bayesian phylogenetic analyses described previously (section 7.2.2), we studied the  
 245 demographic model estimated via Skygrid. We reconstructed a skyline plot that depicts changes in  
 246 effective population size, a measure of relative diversity, through time<sup>26</sup> (Fig. 3B). Sampling biases  
 247 could produce artefactual effects in the Skygrid plot. Nevertheless we expect these to be minor since  
 248 our dataset has a continuous sampling over a century (>2 samples per decade) instead of a  
 249 two-timepoints sampling, as it is common in ancient DNA studies where the rarity of the samples are  
 250 a limiting factor<sup>27</sup>. An additional BEAST run was performed only with modern samples to verify that  
 251 the corresponding part of the tree and population sizes matched (data not shown). Implementation  
 252 of non-phylogenetic methodologies for demographic inference exist, e.g. Multiple Sequentially  
 253 Markovian Coalescent (MSMC)<sup>28</sup>, but after exploring them we concluded their resolution was  
 254 insufficient for analyses of the last several centuries. In order to compare with another method, we  
 255 got rough estimates of the diversity per decade as the average genetic differences between any two  
 256 samples per decade (Fig S6C).

257

bioRxiv preprint doi: <https://doi.org/10.1101/050203>; this version posted November 22, 2016. The copyright holder for this preprint (which was not certified by peer review) is the author/funder, who has granted bioRxiv a license to display the preprint in perpetuity. It is made available under aCC-BY-NC-ND 4.0 International license.

## 258 9.2. Phylogeography

259 We performed another Bayesian phylogenetic analysis incorporating a geographic location trait<sup>29,30</sup>.  
260 For this, Brownian diffusion parameters are estimated by fitting a continuous gradient of geographic  
261 locations along tree branches, starting from the leaves of the tree for which geographic locations are  
262 known, i.e., the collection sites of our samples. We excluded three samples from the West coast of  
263 the United States, separated over three thousand kilometers from the rest, since these do not fit a  
264 gradual propagation by Brownian diffusion. We ran this analysis with the parameters described  
265 previously (section 7.2.2) and sliced the resulting 3D (temporal and geographical) phylogeny at the  
266 early 16<sup>th</sup> and late 18<sup>th</sup> century using SPREAD software<sup>31</sup> (Fig. S6B). Similar to before, we roughly  
267 estimated “local diversity” for each sampling location by computing the average genetic differences  
268 to the 10 closest neighbours (Fig. S6D).

269

## 270 9.3. Isolation by distance

271 We employed a heuristic search<sup>32</sup> using an isolation-by-distance pattern to find the origin of  
272 diffusion of HPG1 in North America, and compared it to the phylogeography analyses. We performed  
273 a regression between genetic distances on geographic distances for all pairs of samples (*genetic*  
274 *distance* ~ *Euclidean geographic distances*). This pattern, known as isolation by distance pattern,  
275 reflects that as individuals are more geographically apart, they differ more genetically. We evaluated  
276 whether this relationship was still significant for each of our samples separately (i.e., from a focal  
277 sample, does genetic distance increase as geographic distance increases?). Only the significant  
278 samples were retained and plotted since those points are the expected origins of migrations (Fig. S6  
279 E,F). Arrows can be plotted in the direction of the maximum slope to illustrate migration trajectories.  
280 This was done separately for historic and modern samples.

281

## 282 **10. Phenotypic association analyses and dating of newly arisen mutations**

### 283 10.1. Phenotyping

#### 284 *10.1.1 Root*

285 Fifteen root phenotypes were scored for  $\geq 10$  replicates per genotype over a time-series experiment  
286 at the Gregor Mendel Institute in Vienna, using image analysis as described in detail elsewhere<sup>33</sup>. We  
287 used the means per genotypes and per time series for association analyses.

288

#### 289 *10.1.2 Seed size*

290 We spread the seeds of given genotypes on separate plastic square 12 x 12 cm Petri dishes. For faster  
291 image acquisition we used a cluster of eight Epson V600 scanners. The scanner cluster was operated  
292 by the BRAT Multiscan image acquisition tool

bioRxiv preprint doi: <https://doi.org/10.1101/050203>; this version posted November 22, 2016. The copyright holder for this preprint (which was not certified by peer review) is the author/funder, who has granted bioRxiv a license to display the preprint in perpetuity. It is made available under aCC-BY-NC-ND 4.0 International license.

293 (www.gmi.oeaw.ac.at/research-groups/wolfgang-busch/resources/brat/). The resulting 1600 dpi  
294 images were analyzed in Fiji software. Scans were converted to 8-bit binary images, thresholded  
295 (parameters: setAutoThreshold("Default dark"); setThreshold(20, 255)) and particles analyzed  
296 (inclusion parameters: size=0.04-0.25 circularity=0.70-1.00). The 2D seed size was measured in  
297 square millimeters (parameters: distance=1600 known=25.4 pixel=1 unit=mm) for 2 plants per  
298 genotype, > 500 seeds per plant.

### 300 10.1.3 Flowering in the growth chamber

301 We estimated the flowering time in growth chambers under four vernalization treatments (0, 14, 28  
302 and 63 days of vernalization). We grew 6 replicates per accession divided between two complete  
303 randomized blocks for each treatment. Seeds were sown on a 1:1 mixture of Premier Pro-Mix and  
304 MetroMix and cold stratified for 6 days (6°C, no light). We then let plants germinate and grow at  
305 18°C, 14 hours of light, 65% humidity. After 3 weeks, we transferred the plants to vernalization  
306 conditions (6°C, 8 hours of light, 65% humidity). After vernalization, plants were transferred back to  
307 long day conditions. Trays were rotated around the growth chambers every other day throughout the  
308 experiment, under both vernalization and ambient conditions. Germination, bolting and flowering  
309 dates were recorded every other day until all plants had flowered. Days till flowering or bolting times  
310 were calculated from the germination date until the first flower opened and until the first flower bud  
311 was developed, respectively. The average flowering time and bolting time per genotype were used  
312 for association analyses.

### 314 10.1.4 Fecundity in the field

315 To investigate variation in fecundity in natural conditions, we grew three replicates of each accession  
316 in a field experiment following a completely randomized block design. Seeds were sown from  
317 09/20/2012 to 09/22/2012 in 66-well trays (well diameter = 4 cm) on soil from the field site where  
318 plants were to be transplanted. The trays were cold stratified for seven days before being placed in a  
319 cold frame at the University of Chicago (outdoors, no additional light or heat, but watered as needed  
320 and protected from precipitation). Seedlings were transplanted directly into tilled ground at the  
321 Warren Wood field station (41.84° N., 86.63° W.), Michigan, USA on 10/13/2012 and 10/14/2012.  
322 Seedlings were watered-in and left to overwinter without further intervention. Upon maturation of  
323 all fruits, stems were harvested and stored between sheets of newsprint paper. To estimate the  
324 fecundity, stems were photographed on a black background and the size of each plant was estimated  
325 as the number of pixels occupied by the plant on the image. This measure correlates well with the  
326 total length of siliques produced, a classical estimator of fecundity in *A. thaliana* (Spearman's  
327  $\rho=0.84$ ,  $p$ -value<0.001, data not shown).

bioRxiv preprint doi: <https://doi.org/10.1101/050203>; this version posted November 22, 2016. The copyright holder for this preprint (which was not certified by peer review) is the author/funder, who has granted bioRxiv a license to display the preprint in perpetuity. It is made available under aCC-BY-NC-ND 4.0 International license.

328

## 329 10.2 Quantitative genetic analyses

330 For 63 modern accessions, we measured time to bolting and flowering, seeds per plant, seed size,  
331 and 15 root phenotypes in common chamber or common garden settings. For all 100 accessions,  
332 climatic information from the bioclim database (<http://www.worldclim.org/bioclim>) was extracted  
333 using their geographic coordinates. For historic samples, some locations were only known by county  
334 name. In this case we assigned the geographic coordinate location of the centroid of the county.

335

### 336 *10.2.1 Heritability*

337 We performed association analyses using the R package GenABEL<sup>34</sup>, with measured phenotypes ( $p =$   
338 25) and climatic variables ( $c = 18$ ) as response variables and SNPs as explanatory variables. A  
339 Minimum Allele Frequency (MAF) cutoff of 5% was used. The number of assessed SNPs was 391 in a  
340 dataset of only modern samples but with imputed genotypes for missing data using Beagle v4.0 (ref.  
341 <sup>35</sup>), and 456 SNPs with a dataset of modern and historic samples, without imputation. For all  
342 associations, at least 63 individuals were genotyped for a specific SNP. We first investigated broad  
343 sense heritability ( $H^2$ ) of each trait using ANOVA partition of variance between and within lines using  
344 replicates (Table S4). Significance was obtained by common F test in ANOVA. Secondly we used the  
345 *polygenic\_hglm* function to fit a genome wide kinship matrix to calculate a narrow sense heritability  
346 estimate ( $h^2$ ). Significance was calculated employing a likelihood ratio test comparing with a null  
347 model. In principle,  $h^2$  is a component of  $H^2$ , then its values should theoretically be  $h^2 < H^2$ ; that is  
348 not our case. Our result cannot be interpreted in this framework, since the calculation of both was  
349 not done with the same samples: for the  $h^2$  calculation we employed genotype means whereas for  
350 the  $H^2$  we used multiple replicated measurements per genotype. The averaging of replicates per  
351 genotype in  $h^2$  reduced environmental and developmental noise and thus we would expect  $h^2 > H^2$ .  
352 We did this so the climatic estimates of  $h^2$ , for which we only have one value per genotype, would be  
353 comparable with the phenotypic  $h^2$  ones (Table S4).

354

### 355 *10.2.2 Linear Models*

356 For association analyses we first employed a linear mixed model that fitted the kinship matrix using  
357 the *mmscore* function, and only three significant SNP hits were discovered using a 5% significance  
358 threshold after False Discovery Rate correction (FDR). This was expected since we have few variants  
359 and these would have originated in an approximated phylogeny structure. We concluded that fitting  
360 the kinship matrix in our model was not appropriate since there would be no residual variation for  
361 association with specific SNPs. With this rationale we employed a fixed effects linear model using the  
362 *qtscore* function<sup>36</sup>. To reduce the false-positive rate we took a conservative permutation strategy by

bioRxiv preprint doi: <https://doi.org/10.1101/050203>; this version posted November 22, 2016. The copyright holder for this preprint (which was not certified by peer review) is the author/funder, who has granted bioRxiv a license to display the preprint in perpetuity. It is made available under aCC-BY-NC-ND 4.0 International license.

363 carrying out association with over 1,000 randomized datasets (permuting phenotypes across  
364 individuals) and used the resulting p-value distribution to correct p-values estimated with the original  
365 dataset. SNPs with p-values below 5% in the empirical p-value distribution were considered  
366 significant (Table S5). In climatic models, we included longitude and latitude as covariates to correct  
367 for any spurious association between SNPs and climate gradients created by the migratory pattern of  
368 isolation by distance.

369

### 370 *10.2.3 Evaluation of significance*

371 Significant SNPs were interspersed throughout the genome (Fig. S7) and their p-values and  
372 phenotypic effects did not correlate with the minimum age of the SNPs nor with their allele  
373 frequency (Fig. S10), something that could have indicated that the significance was merely driven by  
374 the higher statistical power of intermediate frequency variants. Using QQ plots to assess inflation or  
375 deflation of p-values, we observed generally that permutation corrected p-values were deflated.  
376 Straight series of points in QQ plots indicate identical p-values for multiple SNPs, a pattern that we  
377 attributed to long range LD, i.e. lack of independence (see Graphic Table S7 for trait distributions and  
378 QQ plots from each association analysis). We also used a False Discovery Rate correction for the raw  
379 p-values using *p.adjust* in R and, as a sanity check, we used a Bonferroni-corrected threshold, a  
380 procedure considered over-stringent in association analyses (Table S5). This was calculated as:  $5\% /$   
381  $(\text{number of SNPs} + \text{number of traits}) \sim 0.01\%$ .

382

### 383 *10.2.4 Context of de novo mutations associated with phenotypes*

384 For each SNP in our dataset, we determined the ancestral and derived states, by identifying which  
385 allele was found in the oldest herbarium samples. We compared the time of emergence and the  
386 centroid of geographic distribution of the alternative alleles of SNP hits to random draws of SNPs  
387 with the same MAF filtering (5%) (Fig. S8).

388

### 389 *10.2.5 Functional information*

390 On top of phenotypic and climatic associations of SNP hits, we also provide a likely functional effect  
391 employing a commonly used amino acid matrix of biochemical effects<sup>37</sup>. Functional information of  
392 gene name and ontology categorization of SNP hits was obtained from  
393 [www.arabidopsis.org/portals/genAnnotation/gene\\_structural\\_annotation/annotation\\_data.jsp](http://www.arabidopsis.org/portals/genAnnotation/gene_structural_annotation/annotation_data.jsp) and  
394 [www.arabidopsis.org/tools/bulk/go/](http://www.arabidopsis.org/tools/bulk/go/) (Table 1 and Table S5).



bioRxiv preprint doi: <https://doi.org/10.1101/050203>; this version posted November 22, 2016. The copyright holder for this preprint (which was not certified by peer review) is the author/funder, who has granted bioRxiv a license to display the preprint in perpetuity. It is made available under aCC-BY-NC-ND 4.0 International license.

395

396 *10.2.6 Proof of concept examples*

397 We argue that the power of an association approach relies on the fact that HPG1 lines resemble Near  
398 Isogenic Lines (NILs) produced by experimental crosses<sup>38</sup> (Fig. S9A). Similar to genome-wide  
399 association studies (GWA), power depends on many factors, namely the noise of phenotype under  
400 study, architecture of phenotypic trait, quality of genotyping, population structure, sample diversity,  
401 sample size, allele frequency, and recombination. On one hand, association analyses in NILs suffer  
402 from large linkage blocks, but confident results can be achieved due to accurate measurement of  
403 phenotypes, limited genetic differences between any two lines, and high quality genotypes. In  
404 common GWA studies such as in humans, there are multiple confounding effects. Among the  
405 confounders are (1) that any two samples differ in hundreds of thousands of SNPs, and (2) that  
406 historical and geographic stratification produce non-random correlations among those SNP  
407 differences. This considerably complicates the identification of phenotypic effects at specific genes,  
408 and power relies greatly on large sample sizes to achieve the sufficient number of recombination  
409 between markers.

410 To provide support for the non-synonymous SNP on chromosome 5, at position 6,508,329 in  
411 AT5G19330, we looked for pairs of lines that carry the ancestral and the derived allele, but that differ  
412 in few (or no other) SNPs in the genome. When considering all genic substitutions with a minimum  
413 allele frequency of 5% (Fig. S9A), we identified 20 pairs of lines differing only in the AT5G19330 SNP  
414 and another linked SNP (located on a different chromosome, association p-value > 0.4). The  
415 phenotypic differences in mean gravitropic score of these almost-identical pairs were significantly  
416 higher than phenotypic differences among all pairs of HPG1 lines, and genetically identical pairs  
417 attending to substitutions inside genes (Fig. S9A). Furthermore, this SNP was not in complete linkage  
418 with any other SNP hit ( $r^2 < 0.5$ ) (Fig. S7D). The same approach was used to examine the SNPs in  
419 AT1G54440 (Fig. S7E) and AT2G16580 (Fig. S7F), which represent an intermediate and a high LD  
420 example.

421

**REFERENCES**

- 422 1. Weiß, C. L. *et al.* Temporal patterns of damage and decay kinetics of DNA retrieved from plant  
423 herbarium specimens. *Royal Society Open Science* **3**, 160239 (2016).
- 424 2. Meyer, M. & Kircher, M. Illumina sequencing library preparation for highly multiplexed target  
425 capture and sequencing. *Cold Spring Harb. Protoc.* **2010**, db.prot5448 (2010).
- 426 3. Briggs, A. W. *et al.* Removal of deaminated cytosines and detection of in vivo methylation in  
427 ancient DNA. *Nucleic Acids Res.* **38**, e87 (2010).

bioRxiv preprint doi: <https://doi.org/10.1101/050203>; this version posted November 22, 2016. The copyright holder for this preprint (which was not certified by peer review) is the author/funder, who has granted bioRxiv a license to display the preprint in perpetuity. It is made available under aCC-BY-NC-ND 4.0 International license.

- 428 4. Kircher, M. in *Ancient DNA* (eds. Shapiro, B. & Hofreiter, M.) 197–228 (Humana Press, 2011).
- 429 5. Becker, C. *et al.* Spontaneous epigenetic variation in the *Arabidopsis thaliana* methylome.  
430 *Nature* **480**, 245–249 (2011).
- 431 6. Shaw, R. G., Byers, D. L. & Darmo, E. Spontaneous mutational effects on reproductive traits of  
432 *Arabidopsis thaliana*. *Genetics* **155**, 369–378 (2000).
- 433 7. Hagmann, J. *et al.* Century-scale Methylome Stability in a Recently Diverged *Arabidopsis*  
434 *thaliana* Lineage. *PLoS Genet.* **11**, e1004920–e1004920 (2015).
- 435 8. Ossowski, S. *et al.* The rate and molecular spectrum of spontaneous mutations in *Arabidopsis*  
436 *thaliana*. *Science* **327**, 92–94 (2010).
- 437 9. Platt, A. *et al.* The scale of population structure in *Arabidopsis thaliana*. *PLoS Genet.* **6**,  
438 e1000843 (2010).
- 439 10. Jombart, T. adegenet: a R package for the multivariate analysis of genetic markers.  
440 *Bioinformatics* **24**, 1403–1405 (2008).
- 441 11. Choi, K. *et al.* *Arabidopsis* meiotic crossover hot spots overlap with H2A.Z nucleosomes at gene  
442 promoters. *Nat. Genet.* **45**, 1327–1336 (2013).
- 443 12. Hudson, R. R. & Kaplan, N. L. Statistical properties of the number of recombination events in the  
444 history of a sample of DNA sequences. *Genetics* **111**, 147–164 (1985).
- 445 13. Librado, P. & Rozas, J. DnaSP v5: a software for comprehensive analysis of DNA polymorphism  
446 data. *Bioinformatics* **25**, 1451–1452 (2009).
- 447 14. Purcell, S. *et al.* PLINK: a tool set for whole-genome association and population-based linkage  
448 analyses. *Am. J. Hum. Genet.* **81**, 559–575 (2007).
- 449 15. Drummond, A., Pybus, O. G. & Rambaut, A. Inference of viral evolutionary rates from molecular  
450 sequences. *Adv. Parasitol.* **54**, 331–358 (2003).
- 451 16. Treangen, T. J. & Salzberg, S. L. Repetitive DNA and next-generation sequencing: computational  
452 challenges and solutions. *Nat. Rev. Genet.* **13**, 36–46 (2012).
- 453 17. Gill, M. S. *et al.* Improving Bayesian population dynamics inference: a coalescent-based model  
454 for multiple loci. *Mol. Biol. Evol.* **30**, 713–724 (2012).
- 455 18. Drummond, A. J., Ho, S. Y. W., Phillips, M. J. & Rambaut, A. Relaxed phylogenetics and dating  
456 with confidence. *PLoS Biol.* **4**, e88–e88 (2006).
- 457 19. Ferreira, M. a. R. & Suchard, M. a. Bayesian analysis of elapsed times in continuous-time  
458 Markov chains. *Can. J. Stat.* **36**, 355–368 (2008).
- 459 20. Bouckaert, R. R. DensiTree: making sense of sets of phylogenetic trees. *Bioinformatics* **26**,  
460 1372–1373 (2010).
- 461 21. Cao, J. *et al.* Whole-genome sequencing of multiple *Arabidopsis thaliana* populations. *Nat.*  
462 *Genet.* **43**, 956–963 (2011).

bioRxiv preprint doi: <https://doi.org/10.1101/050203>; this version posted November 22, 2016. The copyright holder for this preprint (which was not certified by peer review) is the author/funder, who has granted bioRxiv a license to display the preprint in perpetuity. It is made available under aCC-BY-NC-ND 4.0 International license.

- 463 22. Jiang, C. *et al.* Environmentally responsive genome-wide accumulation of de novo *Arabidopsis*  
464 *thaliana* mutations and epimutations. *Genome Res.* **24**, 1821–1829 (2014).
- 465 23. Wibowo, A. *et al.* Hyperosmotic stress memory in *Arabidopsis* is mediated by distinct  
466 epigenetically labile sites in the genome and is restricted in the male germline by DNA  
467 glycosylase activity. *eLife Sciences* **5**, e13546 (2016).
- 468 24. Hu, T. T. *et al.* The *Arabidopsis lyrata* genome sequence and the basis of rapid genome size  
469 change. *Nat. Genet.* **43**, 476–481 (2011).
- 470 25. Falahati-Anbaran, M., Lundemo, S. & Stenøien, H. K. Seed dispersal in time can counteract the  
471 effect of gene flow between natural populations of *Arabidopsis thaliana*. *New Phytol.* **202**,  
472 1043–1054 (2014).
- 473 26. Drummond, A. J., Suchard, M. A., Xie, D. & Rambaut, A. Bayesian phylogenetics with BEAUti and  
474 the BEAST 1.7. *Mol. Biol. Evol.* **29**, 1969–1973 (2012).
- 475 27. Fu, Q. *et al.* A revised timescale for human evolution based on ancient mitochondrial genomes.  
476 *Curr. Biol.* **23**, 553–559 (2013).
- 477 28. Schiffels, S. & Durbin, R. Inferring human population size and separation history from multiple  
478 genome sequences. *Nat. Genet.* **46**, 919–925 (2014).
- 479 29. Lemey, P., Rambaut, A., Welch, J. J. & Suchard, M. A. Phylogeography takes a relaxed random  
480 walk in continuous space and time. *Mol. Biol. Evol.* **27**, 1877–1885 (2010).
- 481 30. Barton, N. H. & Wilson, I. Genealogies and geography. *Philos. Trans. R. Soc. Lond. B Biol. Sci.*  
482 **349**, 49–59 (1995).
- 483 31. Bielejec, F., Rambaut, A., Suchard, M. A. & Lemey, P. SPREAD: spatial phylogenetic  
484 reconstruction of evolutionary dynamics. *Bioinformatics* **27**, 2910–2912 (2011).
- 485 32. Handley, L. J. L., Manica, A., Goudet, J. & Balloux, F. Going the distance: human population  
486 genetics in a clinal world. *Trends Genet.* **23**, 432–439 (2007).
- 487 33. Slovak, R. *et al.* A Scalable Open-Source Pipeline for Large-Scale Root Phenotyping of  
488 *Arabidopsis*. *Plant Cell* **26**, 2390–2403 (2014).
- 489 34. Aulchenko, Y. S., Ripke, S., Isaacs, A. & van Duijn, C. M. GenABEL: an R library for genome-wide  
490 association analysis. *Bioinformatics* **23**, 1294–1296 (2007).
- 491 35. Browning, B. L. & Browning, S. R. Genotype Imputation with Millions of Reference Samples. *Am.*  
492 *J. Hum. Genet.* **98**, 116–126 (2016).
- 493 36. Aulchenko, Y. S., de Koning, D.-J. & Haley, C. Genomewide rapid association using mixed model  
494 and regression: a fast and simple method for genomewide pedigree-based quantitative trait loci  
495 association analysis. *Genetics* **177**, 577–585 (2007).
- 496 37. Grantham, R. Amino acid difference formula to help explain protein evolution. *Science* **185**,  
497 862–864 (1974).

bioRxiv preprint doi: <https://doi.org/10.1101/050203>; this version posted November 22, 2016. The copyright holder for this preprint (which was not certified by peer review) is the author/funder, who has granted bioRxiv a license to display the preprint in perpetuity. It is made available under aCC-BY-NC-ND 4.0 International license.

- 498 38. Weigel, D. Natural variation in *Arabidopsis*: from molecular genetics to ecological genomics.  
499 *Plant Physiol.* **158**, 2–22 (2012).

500

bioRxiv preprint doi: <https://doi.org/10.1101/050203>; this version posted November 22, 2016. The copyright holder for this preprint (which was not certified by peer review) is the author/funder, who has granted bioRxiv a license to display the preprint in perpetuity. It is made available under aCC-BY-NC-ND 4.0 International license.

501

**SUPPLEMENTAL FIGURES**

502

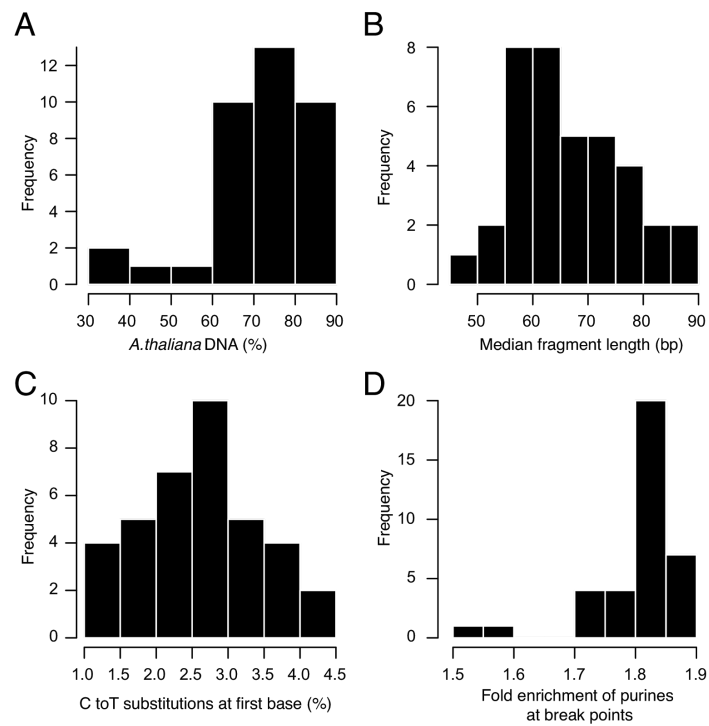

503

**Figure S1. Ancient-DNA-like characteristics of unrepaired herbarium libraries.**

504

**(A)** Fraction of *A. thaliana* DNA in sample. **(B)** Median length of merged reads. **(C)** Fraction of cytosine to thymine (C-to-T) substitutions at first base (5' end). **(D)** Relative enrichment of purines (adenine and guanine) at 5' end breaking points. Position -1 is compared with position -5 (negative numbers indicate genomic context before upstream reads' 5' end).

507

508

bioRxiv preprint doi: <https://doi.org/10.1101/050203>; this version posted November 22, 2016. The copyright holder for this preprint (which was not certified by peer review) is the author/funder, who has granted bioRxiv a license to display the preprint in perpetuity. It is made available under aCC-BY-NC-ND 4.0 International license.

509

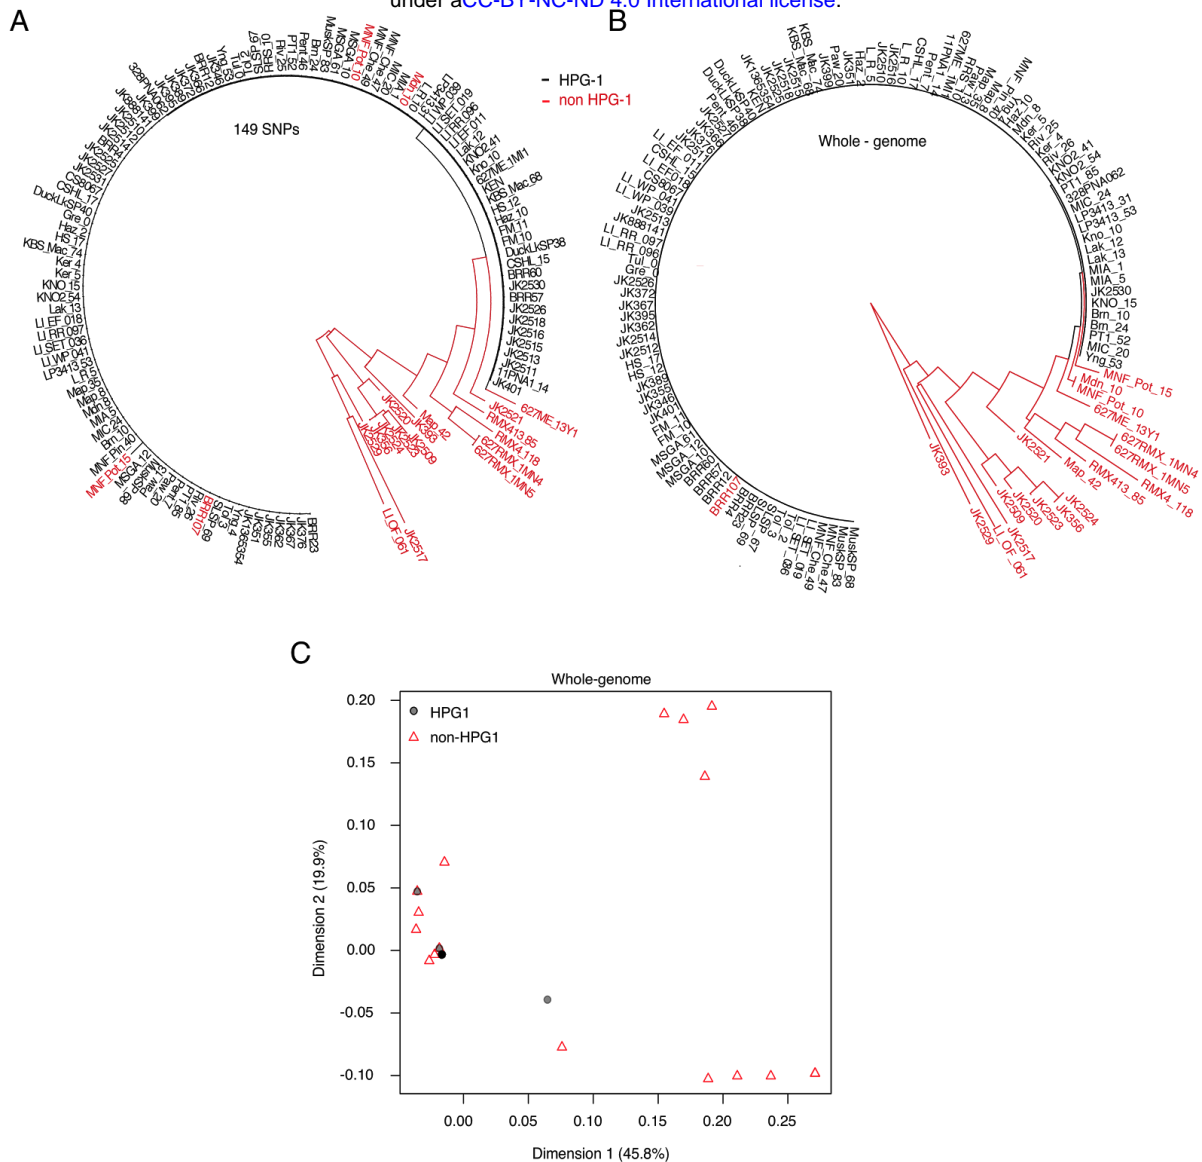

510 **Figure S2. Separation between HPG1 and other North American lineages.**

511 **(A)** Neighbor-joining tree built using Illumina-based SNP calls at the 149 genotyping markers  
 512 originally used to identify HPG1 candidates (consensus of 1,000 replicates). HPG1 accessions are  
 513 shown in black, whereas other North American lineages are depicted in red (see explanation below  
 514 for four HPG1-like accessions). **(B)** Neighbor-joining tree based on genome-wide SNPs (consensus of  
 515 1,000 replicates). Accessions colored as in (A). Note that three accessions originally classified as  
 516 HPG1 based on 149 SNPs (A) are placed outside this clade. A further accession (BRR7) within the  
 517 HPG1 main branch was a recombinant removed from the analysis. **(C)** First two dimensions of a  
 518 multidimensional scaling plot based on identity-by-state pairwise distances. Notice that black dots  
 519 represent multiple transparent dots overlaid, a result of multiple almost-identical HPG1 genomes.  
 520 Percentage of the variance explained by each dimension given in parentheses.

521



bioRxiv preprint doi: <https://doi.org/10.1101/050203>; this version posted November 22, 2016. The copyright holder for this preprint (which was not certified by peer review) is the author/funder, who has granted bioRxiv a license to display the preprint in perpetuity. It is made available under aCC-BY-NC-ND 4.0 International license.

522

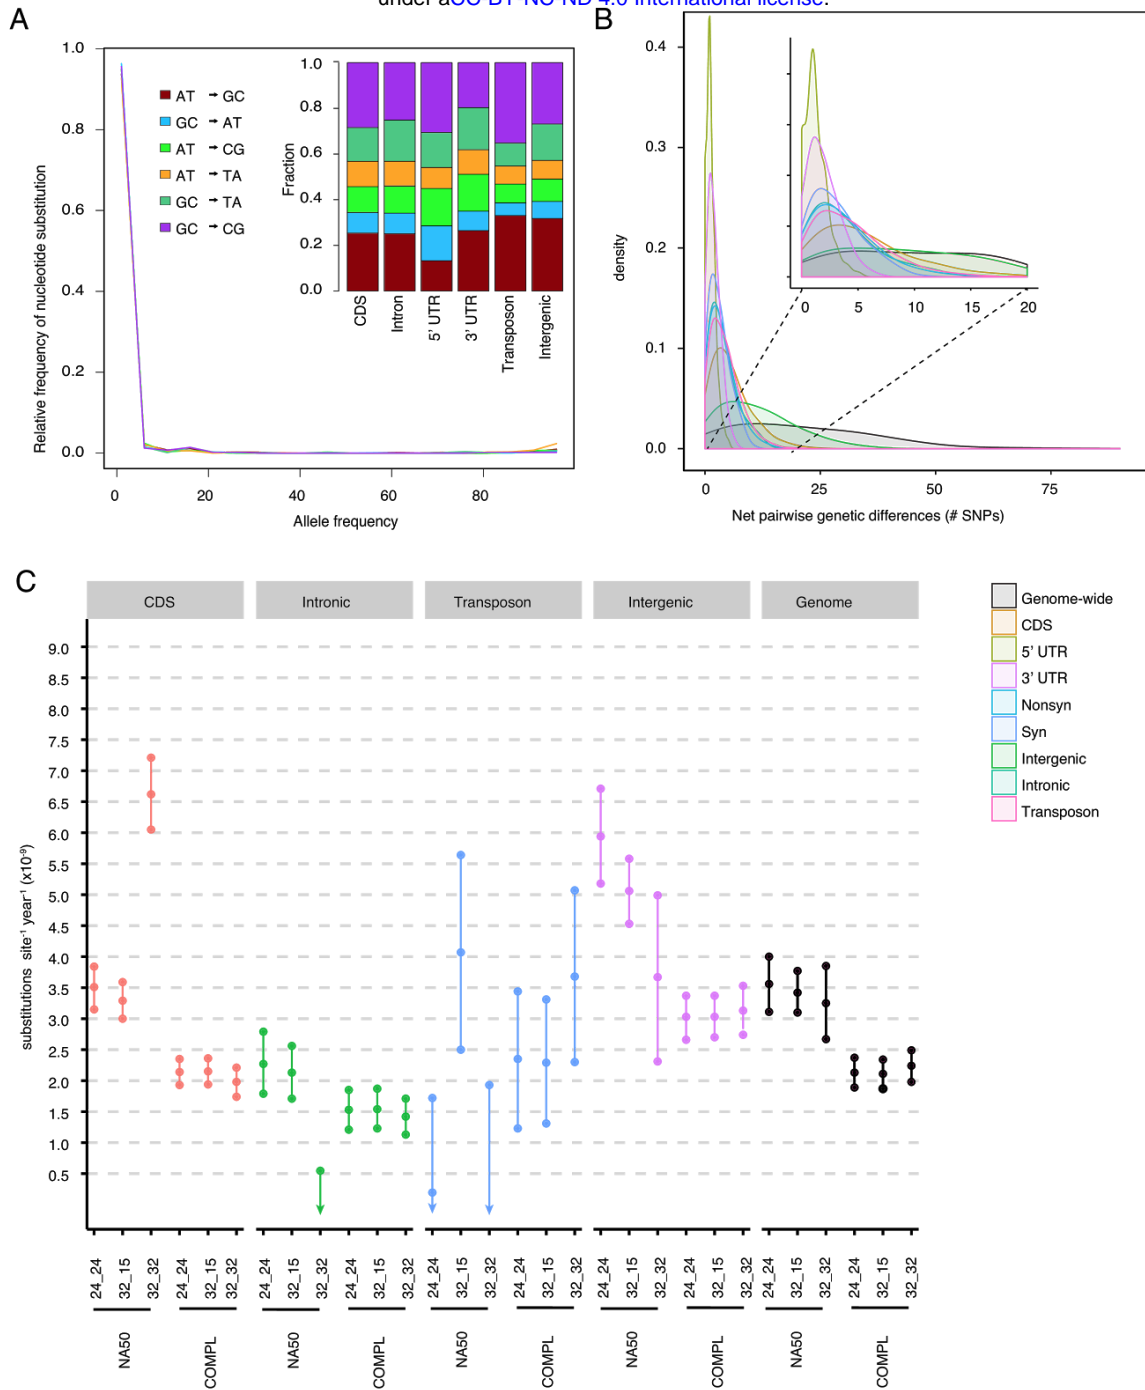

523

### 524 Figure S3. Substitution spectrum and rates.

525 **(A)** “Unfolded” site frequency spectrum using *Arabidopsis lyrata* as outgroup for all transitions and  
 526 transversions. Bar plot shows proportions of different types of substitutions divided by genomic  
 527 annotation. **(B)** Distributions of “net” pairwise genetic distances between historic and modern  
 528 samples used to calculate mutation rates (from quality 32\_15 and complete information per site).  
 529 UTRs were excluded because of the small number of SNPs. **(C)** Mutation rates calculated for different  
 530 genomic annotations and quality thresholds (32\_32, 32\_15, 24\_24) and missing values (NA50:

bioRxiv preprint doi: <https://doi.org/10.1101/050203>; this version posted November 22, 2016. The copyright holder for this preprint (which was not certified by peer review) is the author/funder, who has granted bioRxiv a license to display the preprint in perpetuity. It is made available under aCC-BY-NC-ND 4.0 International license.

531 maximum 50% missing data per SNP, COMPL: missing data 0%). Mean and 95% confidence intervals  
532 are shown.

533

bioRxiv preprint doi: <https://doi.org/10.1101/050203>; this version posted November 22, 2016. The copyright holder for this preprint (which was not certified by peer review) is the author/funder, who has granted bioRxiv a license to display the preprint in perpetuity. It is made available under aCC-BY-NC-ND 4.0 International license.

534

535

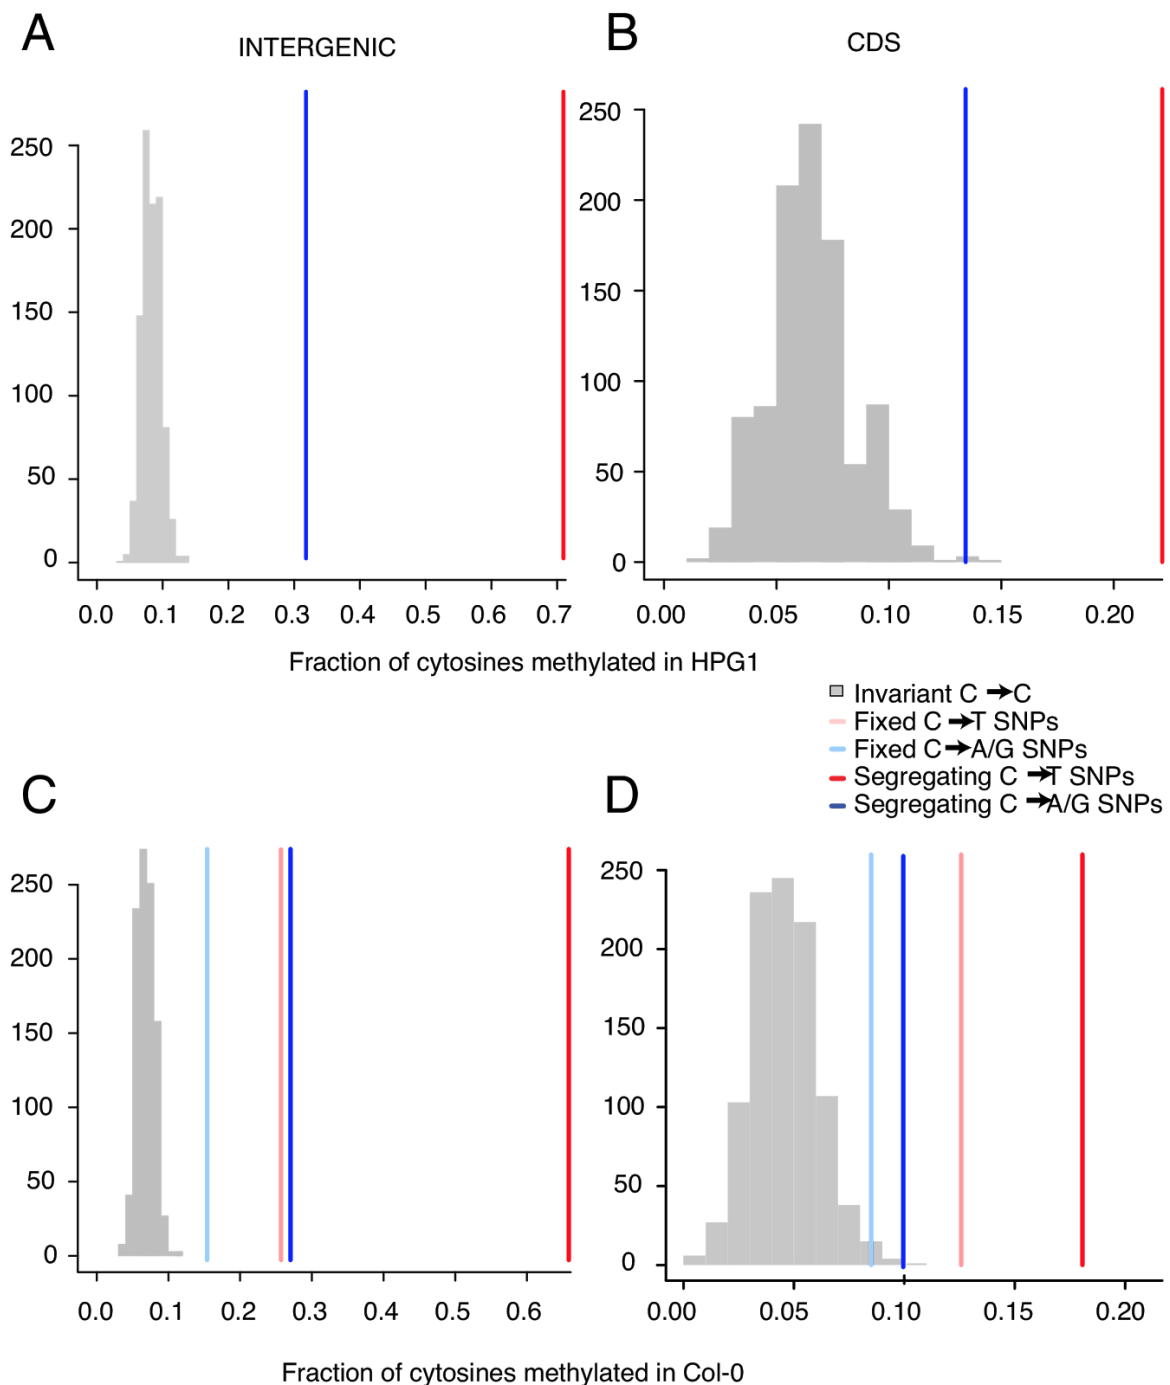

536

**Figure S4. Relationship between methylation and substitutions.**

537

**(A, B)** Fraction of methylation of cytosines in HPG1 pseudo-reference<sup>7</sup> at intergenic (A) or coding

538

regions (B). **(C, D)** Fraction of methylation of cytosines in Col-0 reference genome<sup>5</sup> at intergenic (C) or

539

coding regions (D). In each of the four comparisons, a grey histogram represents distribution of

540

methylation of 1,000 random sets of invariant cytosines. Lines represent average methylation degree

541

at those sites in HPG1 that changed from cytosine to thymine (red). We differentiate those

542

substitutions that are shared - fixed - across all individuals (light red) or whose allele are present at

bioRxiv preprint doi: <https://doi.org/10.1101/050203>; this version posted November 22, 2016. The copyright holder for this preprint (which was not certified by peer review) is the author/funder, who has granted bioRxiv a license to display the preprint in perpetuity. It is made available under aCC-BY-NC-ND 4.0 International license.

543 an intermediate - segregating - frequency (dark red). Likewise, average methylation is shown for sites  
544 that changed from cytosine to adenine (blue) that that are fixed (light blue) or segregating (dark  
545 blue). The fact that the average methylation is higher in new substitutions than in invariant positions  
546 supports a connection between methylation and mutability of sites.  
547

bioRxiv preprint doi: <https://doi.org/10.1101/050203>; this version posted November 22, 2016. The copyright holder for this preprint (which was not certified by peer review) is the author/funder, who has granted bioRxiv a license to display the preprint in perpetuity. It is made available under aCC-BY-NC-ND 4.0 International license.

548

549

550

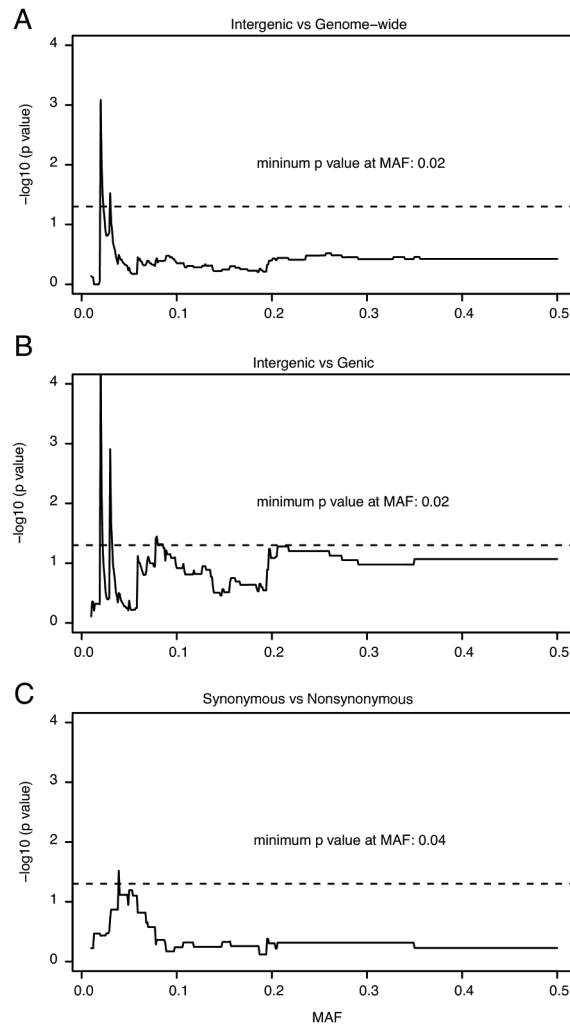

551

### Figure S5. Enrichment of low variants at putatively selected annotations.

552

We tested for an interaction in a 2x2 table of counts of SNPs using Fisher's Exact Test. The tables

553

were built with the number of SNPs falling into each of the two annotations: genome - intergenic **(A)**,

554

genic - intergenic **(B)**, and synonymous - non-synonymous **(C)**; and two discrete allele groups

555

assuming a minimum allele frequency (MAF) cutoff. We repeated the test by sliding the cut-off from

556

0 to 50% allele frequency (x axis) and we show the corresponding p-value (y axis). The dashed line

557

indicates the 5% significance threshold.

558

bioRxiv preprint doi: <https://doi.org/10.1101/050203>; this version posted November 22, 2016. The copyright holder for this preprint (which was not certified by peer review) is the author/funder, who has granted bioRxiv a license to display the preprint in perpetuity. It is made available under aCC-BY-NC-ND 4.0 International license.

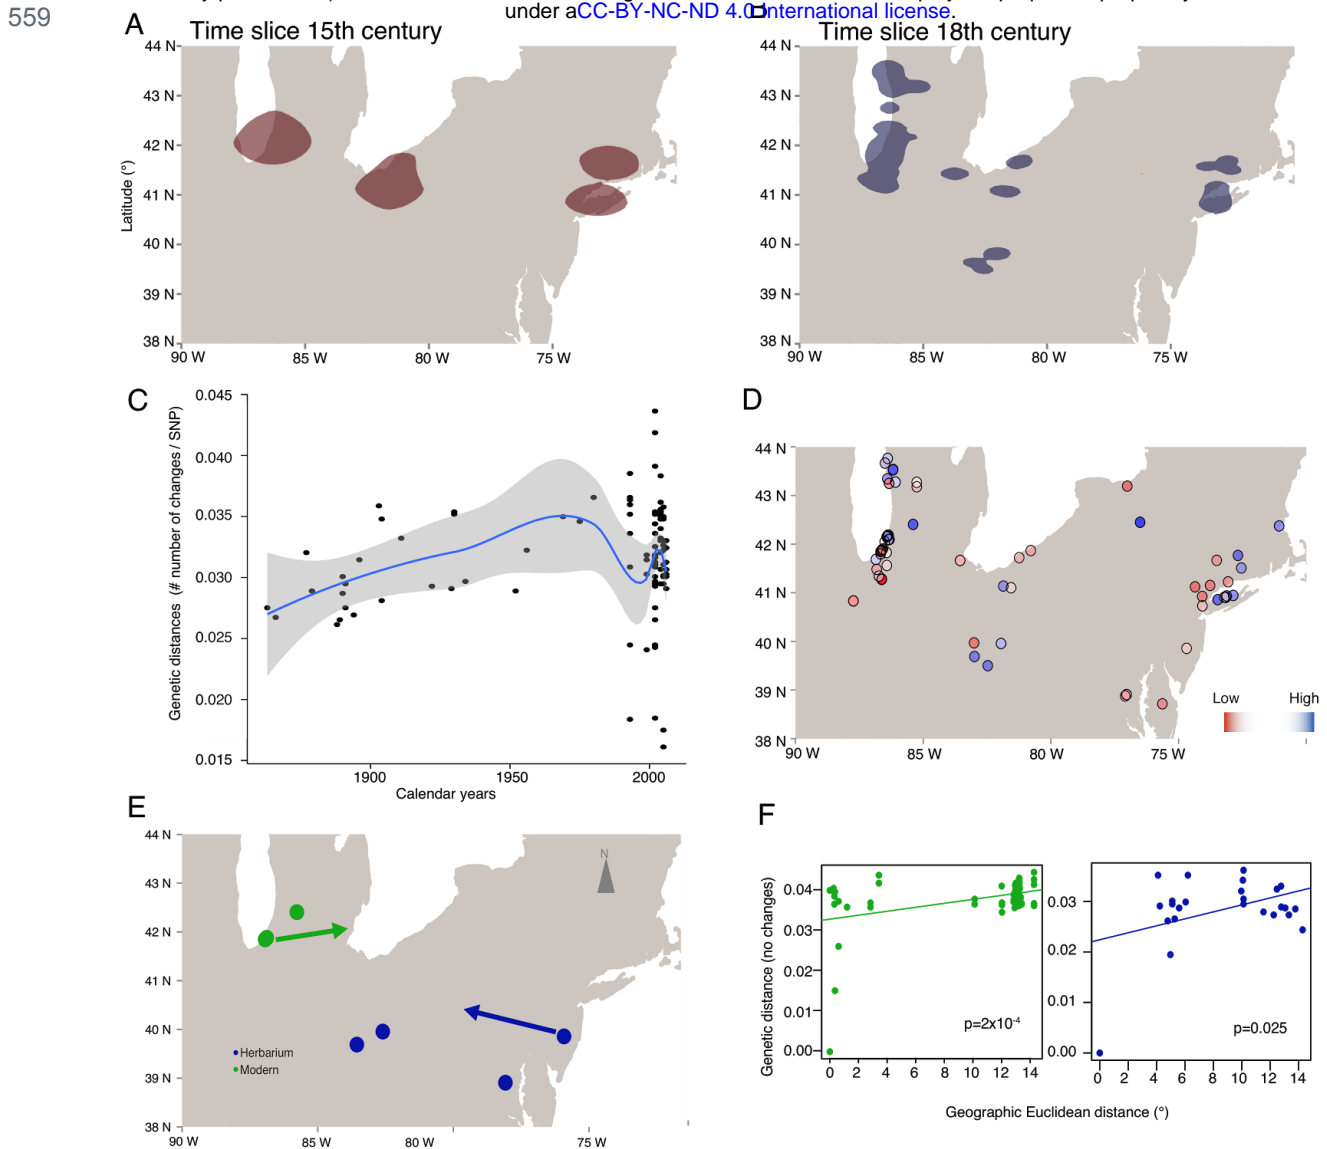

560 **Figure S6. Phylogeographic inference in HPG1.**

561 **(A, B)** The model infers the most probable geographic location of each of the nodes of the phylogeny  
 562 in Figure 3. **(A)** Ancestral distribution map (dark red/brown) summarizing the first ~100 years of the  
 563 phylogenetic tree. Clouds represent the 95% interval of the Highest Posterior Probability Density of  
 564 locations. **(B)** Current distribution map (dark blue) summarizing the last ~100 years. Clouds as in (A).  
 565 **(C)** Diversity in time. Each point represents the average number of genetic changes between a  
 566 sample and the other samples within a decade. The blue line shows the fit using a generalized  
 567 additive model and the grey shaded area the 95% confidence interval. **(D)** Diversity in space. Each  
 568 point represents the average number of genetic changes among the 10 geographically closest  
 569 neighbors. Genetic distances are shown qualitatively from a red (low) to blue (high) gradient. **(E)**  
 570 Origin of herbarium and modern geographic spread, determined using separate heuristic searches of



bioRxiv preprint doi: <https://doi.org/10.1101/050203>; this version posted November 22, 2016. The copyright holder for this preprint (which was not certified by peer review) is the author/funder, who has granted bioRxiv a license to display the preprint in perpetuity. It is made available under aCC-BY-NC-ND 4.0 International license.

571 isolation-by-distance patterns. Three locations of modern samples and four locations of herbarium  
572 samples showed significant slopes ( $p < 0.05$ ) in the isolation-by-distance pattern. That is, genetic  
573 distance increased when moving away from these geographic locations. For one sample of each  
574 subset, herbarium (**F**) and modern (**G**), a likely migration trajectory is depicted by an arrow and its  
575 isolation-by-distance pattern is shown.

576

577

bioRxiv preprint doi: <https://doi.org/10.1101/050203>; this version posted November 22, 2016. The copyright holder for this preprint (which was not certified by peer review) is the author/funder, who has granted bioRxiv a license to display the preprint in perpetuity. It is made available under aCC-BY-NC-ND 4.0 International license.

578

579

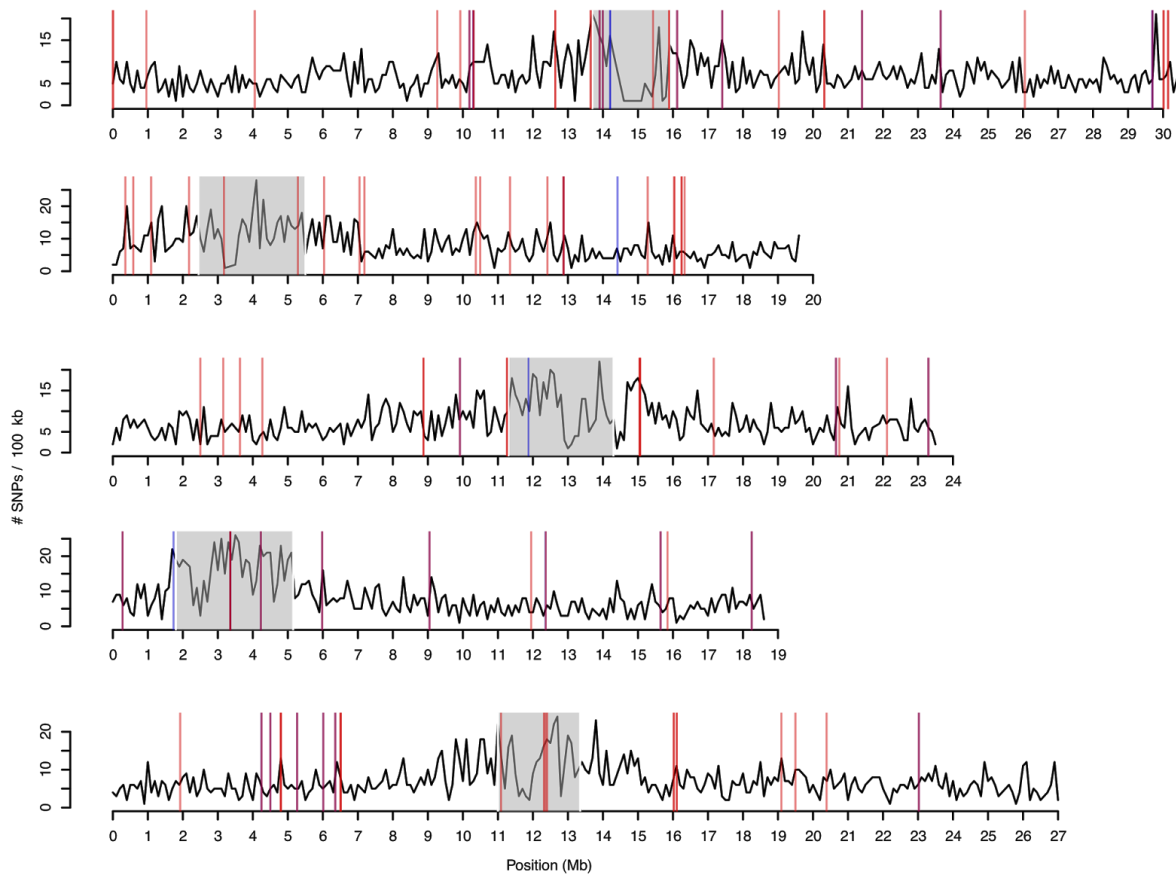

580 **Figure S7. Density of SNPs along all chromosomes and location of SNP hits.**

581 Black line shows number of SNPs per 100 kb window. Centromere locations are indicated by grey  
 582 shading. Vertical lines indicate SNPs associated with root phenotypes (red) and climatic variables  
 583 (blue) (see Table S5).

584

bioRxiv preprint doi: <https://doi.org/10.1101/050203>; this version posted November 22, 2016. The copyright holder for this preprint (which was not certified by peer review) is the author/funder, who has granted bioRxiv a license to display the preprint in perpetuity. It is made available under aCC-BY-NC-ND 4.0 International license.

585

586

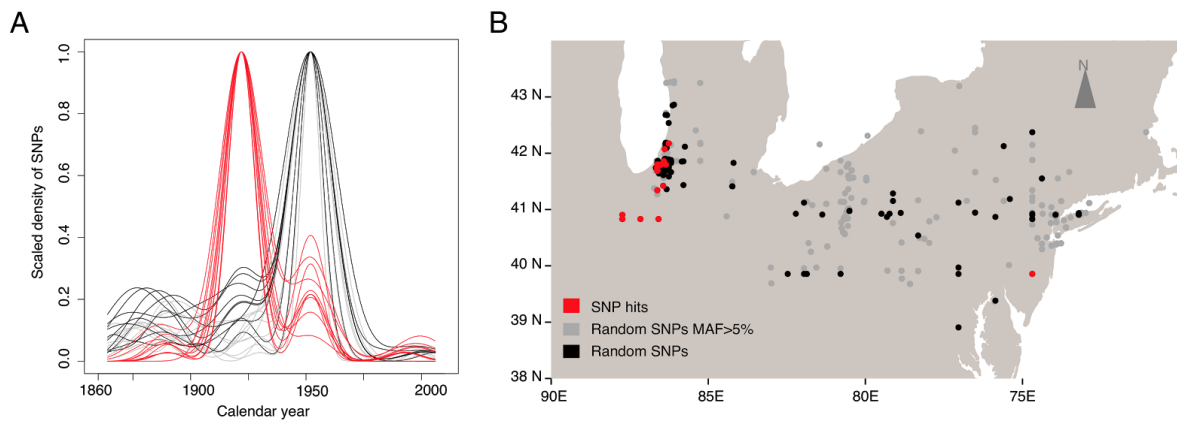

587

**Figure S8. Spatial and temporal emergence of root-associated mutations.**

588

589

590

591

592

593

594

595

596

**(A)** Age distribution of derived SNPs with a significant trait association (the herbarium sample in which they were first recorded) (red), compared with genome-wide SNPs with at least 5% minor allele frequency (grey), or without frequency cutoff (black). **(B)** Spatial centroid of all samples carrying a derived allele. Since it is an average location, centroids can be in a body of water. Ten random draws of 50 SNPs for each category were used to produce the density lines in (A) and points in (B).

bioRxiv preprint doi: <https://doi.org/10.1101/050203>; this version posted November 22, 2016. The copyright holder for this preprint (which was not certified by peer review) is the author/funder, who has granted bioRxiv a license to display the preprint in perpetuity. It is made available under aCC-BY-NC-ND 4.0 International license.

597

598

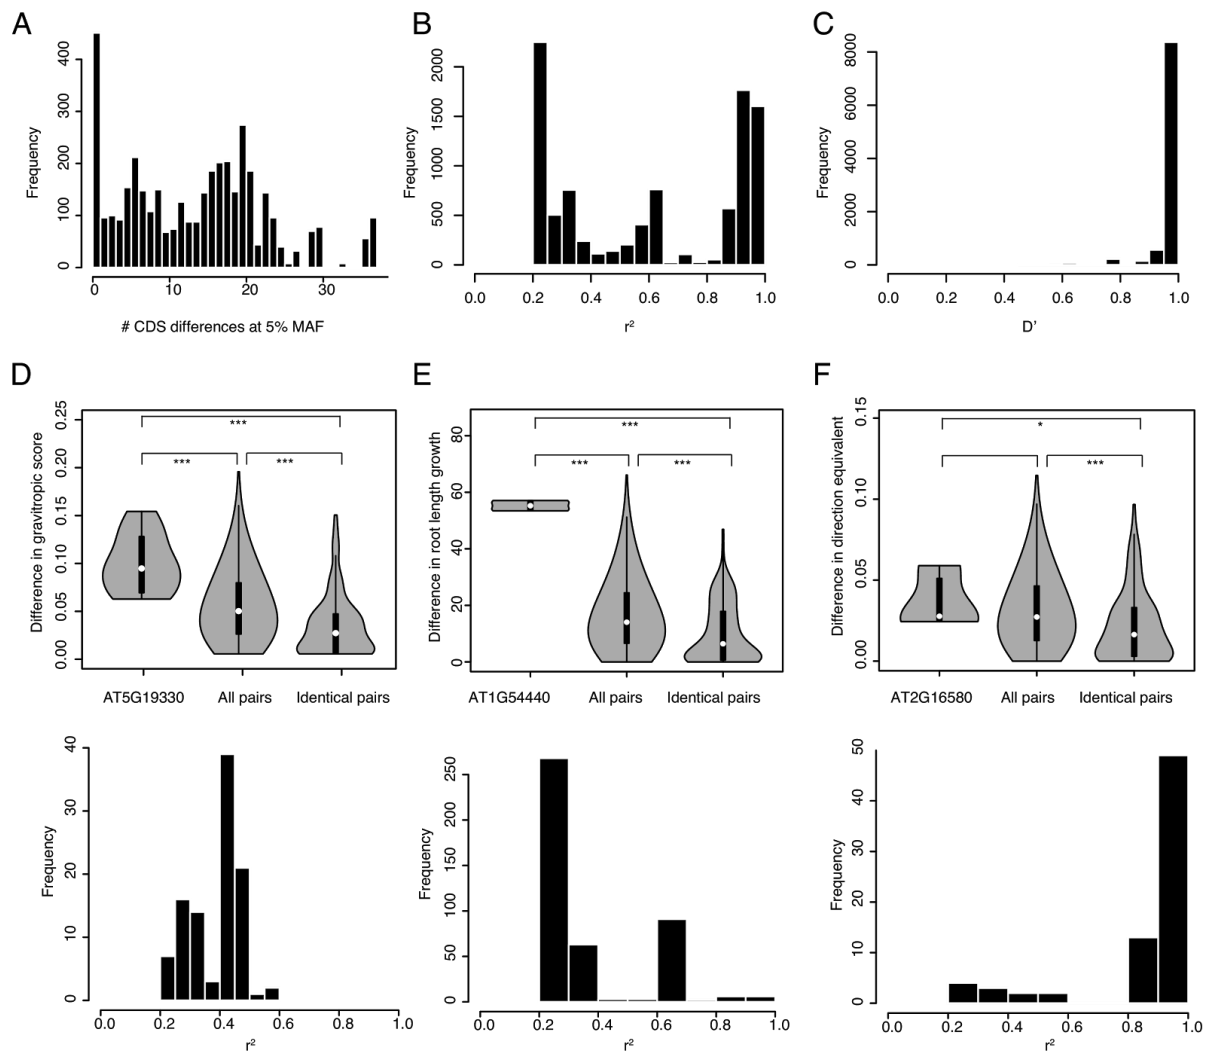

599

**Figure S9. Linkage disequilibrium between SNPs with significant trait associations.**

600

(A-F) Linkage disequilibrium between SNPs with significant trait associations. Histogram of genetic distances (A) between samples when evaluating only coding regions at 5% minimum allele frequency. Linkage disequilibrium between SNP hits measured as  $r^2$  (B) and  $D'$  (C). Three significant SNPs were further studied to exemplify the power of association analyses with HPG1. For each, phenotypic differences between accessions that differ in the focal SNP and that are otherwise virtually genetically identical are compared both with all pairs of accessions and with pairs of accessions completely identical for coding regions. Below each violin plot is the histogram of linkage disequilibrium of the focal SNP with all other SNP hits. The three focal SNPs evaluated are located in AT5G19330 (D), AT1G54440 (E) and AT2G16580 (F).

609

bioRxiv preprint doi: <https://doi.org/10.1101/050203>; this version posted November 22, 2016. The copyright holder for this preprint (which was not certified by peer review) is the author/funder, who has granted bioRxiv a license to display the preprint in perpetuity. It is made available under aCC-BY-NC-ND 4.0 International license.

610

611

612

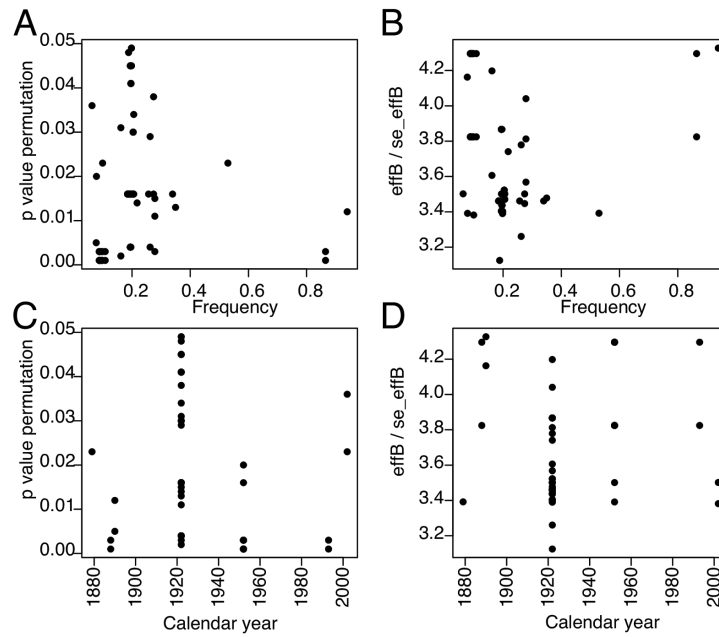

613

**Figure S10. Correlations of SNP effects and p-values with frequency and age.**

614

Correlation between SNP frequency and p-value (**A**), frequency and effect (**B**), age and p-value (**C**),

615

age and effect (**D**). All cases were non-significant.

616

617

bioRxiv preprint doi: <https://doi.org/10.1101/050203>; this version posted November 22, 2016. The copyright holder for this preprint (which was not certified by peer review) is the author/funder, who has granted bioRxiv a license to display the preprint in perpetuity. It is made available under a [CC-BY-NC-ND 4.0 International license](#).

618 **SUPPLEMENTAL TABLES**

619 See appended **.pdf** file for **Tables S1-5**.

620 See appended **.pdf** file for **Graphic Table S7**: For each trait employed in association analyses, we  
621 report the histogram distribution and the QQ plot of p-values to ensure that no trait departs  
622 exaggeratedly from the normal distribution, and that no inflation of p-values is observed (when  
623  $\lambda \leq 1$ , there is no inflation of false positives).

624

625



**Table S1. Sample information.**

(Abbreviation H\* indicates herbarium samples that cluster with the modern HPG1 clade rather than the historic HPG1 clade in Fig. 3., highlighted as a star in the map from Fig. 1. Abbreviations of herbarium collections or seed sources: UCONN = University of Connecticut Herbarium; CFM = Chicago Field Museum; NY = New York Botanical Garden; ABRC = Arabidopsis Biological Resources Center; OSU = Ohio State University.)

| Accession | Latitude (°N) | Longitude (°E) | State | Date collected | Alternative name | Collector/ Herbarium | Average coverage (x) | Number of covered positions (≥3x) (mapped against HPG1 reference) | Number of covered positions (≥3x) (mapped against Col_0 reference) | SNPs vs HPG1 reference | Belongs to HPG1 | Modern/ Herbarium | Column number in the available genome matrix |
|-----------|---------------|----------------|-------|----------------|------------------|----------------------|----------------------|-------------------------------------------------------------------|--------------------------------------------------------------------|------------------------|-----------------|-------------------|----------------------------------------------|
| JK399     | 38.7155       | -75.635591     | DE    | 1863           | 888124           | NY                   | 9                    | 105,053,631                                                       | 99,889,683                                                         | 142                    | yes             | H                 | 101                                          |
| JK366     | 43.1921       | -77.0102       | NY    | 1866           | 888144           | NY                   | 6.8                  | 100,379,839                                                       | 95,118,236                                                         | 123                    | yes             | H                 | 94                                           |
| JK395     | 38.9068       | -77.036667     | DC    | 1877           | 888134           | NY                   | 10.3                 | 103,620,791                                                       | 98,888,406                                                         | 167                    | yes             | H                 | 100                                          |
| JK888141  | 40.732007     | -74.068455     | NJ    | 1879           | 888141           | NY                   | 42                   | 107,211,409                                                       | 102,634,255                                                        | 161                    | yes             | H                 | 103                                          |
| JK389     | 38.9068       | -77.036667     | DC    | 1888           | 1365363          | NY                   | 9.9                  | 106,042,465                                                       | 100,826,958                                                        | 151                    | yes             | H                 | 98                                           |
| JK362     | 38.9068       | -77.036667     | DC    | 1889           | 1365364          | NY                   | 8.8                  | 103,997,716                                                       | 98,876,320                                                         | 153                    | yes             | H                 | 93                                           |
| JK367     | 40.9249       | -74.0755       | NJ    | 1890           | 1365344          | NY                   | 16.7                 | 107,236,732                                                       | 102,176,782                                                        | 181                    | yes             | H                 | 95                                           |
| JK372     | 41.1222       | -74.3569       | NJ    | 1890           | 1365332          | NY                   | 14.8                 | 106,285,178                                                       | 101,480,369                                                        | 163                    | yes             | H                 | 96                                           |
| JK1365354 | 38.8782       | -77.09048      | VA    | 1891           | 1365354          | NY                   | 36.4                 | 106,718,326                                                       | 102,458,166                                                        | 169                    | yes             | H                 | 88                                           |
| JK376     | 39.97         | -83.01         | NY    | 1891           | 1365337          | NY                   | 12.3                 | 105,962,154                                                       | 100,840,125                                                        | 145                    | yes             | H                 | 97                                           |
| JK351     | 41.15         | -73.766667     | NY    | 1894           | 1365333          | NY                   | 16.1                 | 106,531,302                                                       | 101,841,156                                                        | 153                    | yes             | H                 | 90                                           |
| JK355     | 35.99         | -83.94         | TE    | 1896           | 1365374          | NY                   | 14.3                 | 106,391,637                                                       | 101,455,311                                                        | 192                    | yes             | H                 | 91                                           |
| JK356     | n/a           | n/a            | GA    | 1897           | 1365375          | NY                   | 5.3                  | 90,426,010                                                        | 89,296,191                                                         | n/a                    | no              | H                 | 92                                           |
| JK393     | n/a           | n/a            | NC    | 1897           | 1365370          | NY                   | 30.4                 | 102,894,430                                                       | 101,298,068                                                        | n/a                    | no              | H                 | 99                                           |
| JK346     | 40.643136     | -111.95177     | UT    | 1903           | 102365           | NY                   | 29.1                 | 107,223,283                                                       | 102,450,446                                                        | 222                    | yes             | H                 | 89                                           |
| JK2525    | 41.224343     | -73.06021      | CT    | 1904           | 79391            | UNCONN               | 12.5                 | 105,025,845                                                       | n/a                                                                | 138                    | yes             | H                 | 118                                          |
| JK2529    | n/a           | n/a            | OH    | 1904           | 176849           | CFM                  | 11.4                 | 100,620,441                                                       | n/a                                                                | n/a                    | no              | H                 | 121                                          |

|         |           |            |    |      |               |        |      |             |             |     |     |    |     |
|---------|-----------|------------|----|------|---------------|--------|------|-------------|-------------|-----|-----|----|-----|
| JK401   | 40.643136 | -111.95177 | UT | 1904 | 102364        | NY     | 10.4 | 99,572,736  | 94,661,828  | 216 | yes | H  | 102 |
| JK2513  | 41.102121 | -81.560547 | OH | 1911 | 25            | OSU    | 18.2 | 106,309,854 | n/a         | 176 | yes | H  | 108 |
| JK2509  | n/a       | n/a        | CT | 1917 | 11            | OSU    | 15.1 | 102,169,546 | n/a         | n/a | no  | H  | 104 |
| JK2530  | 41.482862 | -86.822602 | IN | 1922 | 531679        | CFM    | 22.2 | 107,043,540 | n/a         | 161 | yes | H  | 122 |
| JK2526  | 41.666667 | -73.508455 | CT | 1929 | 79409         | UNCONN | 16.3 | 107,026,827 | n/a         | 161 | yes | H  | 119 |
| JK2515  | 41.137296 | -81.863779 | OH | 1930 | 30            | OSU    | 21.3 | 106,893,416 | n/a         | 193 | yes | H  | 110 |
| JK2511  | 41.721618 | -81.243317 | OH | 1934 | 14            | OSU    | 5.6  | 95,822,372  | n/a         | 109 | yes | H  | 106 |
| JK2523  | n/a       | n/a        | OH | 1940 | 25707         | UNC    | 13.1 | 101,421,749 | n/a         | n/a | no  | H  | 116 |
| JK2520  | n/a       | n/a        | OH | 1945 | 54051         | UNC    | 20.3 | 102,831,697 | n/a         | n/a | no  | H  | 114 |
| JK2524  | 39.856783 | -74.686954 | NJ | 1952 | 63978         | UNC    | 13.8 | 100,778,282 | n/a         | n/a | no  | H  | 117 |
| JK2512  | 39.95607  | -81.953309 | OH | 1956 | 21            | OSU    | 16.7 | 106,801,844 | n/a         | 189 | yes | H  | 107 |
| JK2514  | 39.95607  | -81.953309 | OH | 1969 | 27            | OSU    | 28.4 | 107,044,415 | n/a         | 219 | yes | H  | 109 |
| JK2517  | n/a       | n/a        | OH | 1981 | 34            | OSU    | 21.7 | 102,643,436 | n/a         | n/a | no  | H  | 112 |
| JK2521  | n/a       | n/a        | OH | 1992 | 565960        | UNC    | 2.9  | 62,673,938  | n/a         | n/a | no  | H  | 115 |
| JK2518  | 41.867643 | -80.789021 | OH | 1993 | 40            | OSU    | 14.8 | 106,578,197 | n/a         | 177 | yes | H  | 113 |
| JK2531  | 39.856783 | -74.686954 | NJ | 1952 | 1507461       | CFM    | 15.1 | 106,158,181 | n/a         | 177 | yes | H* | 123 |
| JK2510  | 39.688861 | -82.993218 | OH | 1930 | 13            | OSU    | 21   | 106,305,970 | n/a         | 178 | yes | H* | 105 |
| JK2527  | 41.509059 | -72.543694 | CT | 1975 | 79389         | UNCONN | 8.3  | 104,089,205 | n/a         | 200 | yes | H* | 120 |
| JK2516  | 39.500862 | -82.472413 | OH | 1980 | 32            | OSU    | 18.1 | 106,464,569 | n/a         | 198 | yes | H* | 111 |
| CSHL_15 | 40.8585   | -73.4675   | NY | 1993 | CSHL-15       | ABRC   | 39.3 | 108,189,771 | 105,955,885 | 243 | yes | M  | 16  |
| CSHL_17 | 40.8585   | -73.4675   | NY | 1993 | CSHL-17       | ABRC   | 41.5 | 108,194,960 | 105,982,511 | 240 | yes | M  | 17  |
| FM_10   | 42.4489   | -76.5072   | NY | 1993 | FM-10         | ABRC   | 44.6 | 108,203,215 | 106,052,866 | 269 | yes | M  | 20  |
| FM_11   | 42.4489   | -76.5072   | NY | 1993 | FM-11         | ABRC   | 44.4 | 108,214,008 | 106,040,276 | 288 | yes | M  | 21  |
| HS_12   | 42.373    | -71.0627   | MA | 1993 | HS-12         | ABRC   | 48.8 | 108,230,030 | 106,124,249 | 251 | yes | M  | 25  |
| HS_17   | 42.373    | -71.0627   | MA | 1993 | HS-17         | ABRC   | 55.3 | 108,242,062 | 106,155,362 | 254 | yes | M  | 26  |
| Kno_10  | 41.2816   | -86.621    | IN | 1993 | Kno-10        | ABRC   | 39.4 | 108,198,601 | 105,985,288 | 226 | yes | M  | 32  |
| KNO_15  | 41.2816   | -86.621    | IN | 1993 | KNO-15        | ABRC   | 43.6 | 108,219,683 | 106,069,077 | 231 | yes | M  | 33  |
| Gre_0   | 43.178    | -85.2532   | MI | 1995 | Gre-0         | ABRC   | 44.6 | 108,209,345 | 106,032,827 | 207 | yes | M  | 22  |
| Tul_0   | 43.2708   | -85.2563   | MI | 1995 | CS6877        | ABRC   | 31.2 | 108,140,393 | 105,806,418 | 221 | yes | M  | 85  |
| CS8067  | 41.3599   | -122.755   | CA | 1996 | Buckhorn Pas: | ABRC   | 66.4 | 108,260,489 | 106,243,277 | 294 | yes | M  | 15  |
| Tol_2   | 41.6639   | -83.5553   | OH | 1996 | CS8022        | ABRC   | 61   | 108,241,333 | 106,194,209 | 238 | yes | M  | 83  |
| Tol_3   | 41.6639   | -83.5553   | OH | 1996 | CS8023        | ABRC   | 40.2 | 108,184,749 | 105,953,559 | 232 | yes | M  | 84  |
| MIA_1   | 41.7976   | -86.6691   | MI | 1999 | MIA-1         | ABRC   | 73.1 | 108,279,881 | 106,291,612 | 234 | yes | M  | 56  |

|            |         |          |    |      |            |      |      |             |             |     |     |   |    |
|------------|---------|----------|----|------|------------|------|------|-------------|-------------|-----|-----|---|----|
| MIA_5      | 41.7976 | -86.6691 | MI | 1999 | MIA-5      | ABRC | 62.9 | 108,263,557 | 106,250,560 | 235 | yes | M | 57 |
| MIC_20     | 41.8266 | -86.4366 | MI | 1999 | MIC-20     | ABRC | 39.9 | 108,200,416 | 106,010,135 | 237 | yes | M | 58 |
| MIC_24     | 41.8266 | -86.4366 | MI | 1999 | MIC-24     | ABRC | 33.8 | 108,176,527 | 105,728,326 | 237 | yes | M | 59 |
| Brn_10     | 41.9    | -86.583  | MI | 2002 | Brn-10     | ABRC | 33.3 | 108,177,381 | 105,905,097 | 243 | yes | M | 7  |
| Brn_24     | 41.9    | -86.583  | MI | 2002 | Brn-24     | ABRC | 38.4 | 108,208,482 | 105,951,803 | 228 | yes | M | 8  |
| Haz_10     | 41.879  | -86.607  | MI | 2002 | Haz-10     | ABRC | 33.8 | 108,154,100 | 105,903,700 | 230 | yes | M | 23 |
| Haz_2      | 41.879  | -86.607  | MI | 2002 | Haz-2      | ABRC | 39.7 | 108,201,103 | 106,004,251 | 288 | yes | M | 24 |
| Ker_4      | 42.184  | -86.358  | MI | 2002 | Ker-4      | ABRC | 32.1 | 108,132,127 | 105,806,486 | 261 | yes | M | 30 |
| Ker_5      | 42.184  | -86.358  | MI | 2002 | Ker-5      | ABRC | 62.9 | 108,259,905 | 106,246,278 | 259 | yes | M | 31 |
| L_R_10     | 41.847  | -86.67   | MI | 2002 | L-R-10     | ABRC | 22.4 | 108,062,944 | 105,496,224 | 186 | yes | M | 49 |
| L_R_5      | 41.847  | -86.67   | MI | 2002 | L-R-5      | ABRC | 60.6 | 108,255,795 | 106,209,826 | 299 | yes | M | 50 |
| Lak_12     | 41.8    | -86.67   | MI | 2002 | Lak-12     | ABRC | 37.8 | 108,176,901 | 105,775,999 | 237 | yes | M | 36 |
| Lak_13     | 41.8    | -86.67   | MI | 2002 | Lak-13     | ABRC | 28.5 | 107,955,559 | 105,553,559 | 226 | yes | M | 37 |
| Map_35     | 42.166  | -86.412  | MI | 2002 | Map-35     | ABRC | 64.7 | 108,265,863 | 106,224,216 | 290 | yes | M | 51 |
| Map_42     | 42.166  | -86.412  | MI | 2002 | Map-42     | ABRC | 46   | 107,303,032 | 106,093,945 | n/a | no  | M | 52 |
| Map_8      | 42.166  | -86.412  | MI | 2002 | Map-8      | ABRC | 33.4 | 108,155,999 | 105,921,907 | 287 | yes | M | 53 |
| Mdn_10     | 42.051  | -86.509  | MI | 2002 | Mdn-10     | ABRC | 34.9 | 108,106,772 | 105,906,924 | n/a | no  | M | 54 |
| Mdn_8      | 42.051  | -86.509  | MI | 2002 | Mdn-8      | ABRC | 37.4 | 108,199,679 | 105,940,666 | 266 | yes | M | 55 |
| Paw_13     | 42.148  | -86.431  | MI | 2002 | Paw-13     | ABRC | 43   | 108,159,739 | 105,980,721 | 267 | yes | M | 70 |
| Paw_20     | 42.148  | -86.431  | MI | 2002 | Paw-20     | ABRC | 41.3 | 108,218,762 | 106,059,867 | 241 | yes | M | 71 |
| Riv_25     | 42.184  | -86.382  | MI | 2002 | Riv-25     | ABRC | 36.8 | 108,186,632 | 105,779,717 | 273 | yes | M | 76 |
| Riv_26     | 42.184  | -86.382  | MI | 2002 | Riv-26     | ABRC | 35.7 | 108,194,281 | 105,958,738 | 260 | yes | M | 77 |
| Yng_4      | 41.865  | -86.646  | MI | 2002 | Yng-4      | ABRC | 41.3 | 108,182,789 | 106,000,003 | 289 | yes | M | 86 |
| Yng_53     | 41.865  | -86.646  | MI | 2002 | Yng-53     | ABRC | 46   | 108,230,553 | 106,125,861 | 191 | yes | M | 87 |
| RRS_10     | 41.5609 | -86.4251 | IN | 2003 | RRS-10     | ABRC | 41.8 | 108,208,144 | 106,033,465 | 274 | yes | M | 80 |
| DuckLkSP38 | 43.3431 | -86.4045 | MI | 2004 | DuckLkSP38 | ABRC | 37.1 | 108,171,751 | 105,932,415 | 253 | yes | M | 18 |
| DuckLkSP40 | 43.3431 | -86.4045 | MI | 2004 | DuckLkSP40 | ABRC | 39.6 | 108,204,654 | 105,969,244 | 257 | yes | M | 19 |
| KBS_Mac_68 | 42.405  | -85.398  | MI | 2004 | KBS-Mac-68 | ABRC | 41.3 | 108,181,390 | 105,870,424 | 259 | yes | M | 27 |
| KBS_Mac_74 | 42.405  | -85.398  | MI | 2004 | KBS-Mac-74 | ABRC | 37.7 | 108,160,645 | 105,801,702 | 265 | yes | M | 28 |
| MNF_Che_47 | 43.5251 | -86.1843 | MI | 2004 | MNF-Che-47 | ABRC | 27.6 | 108,093,393 | 105,596,885 | 281 | yes | M | 60 |
| MNF_Che_49 | 43.5251 | -86.1843 | MI | 2004 | MNF-Che-49 | ABRC | 28.5 | 108,082,202 | 105,661,610 | 274 | yes | M | 61 |
| MNF_Pin_40 | 43.5356 | -86.1788 | MI | 2004 | MNF-Pin-40 | ABRC | 47.9 | 108,238,775 | 106,099,919 | 287 | yes | M | 62 |
| MNF_Pot_10 | 43.595  | -86.2657 | MI | 2004 | MNF-Pot-10 | ABRC | 61.4 | 108,189,553 | 106,228,588 | n/a | no  | M | 63 |

|             |         |          |    |      |            |      |       |             |             |     |     |   |    |
|-------------|---------|----------|----|------|------------|------|-------|-------------|-------------|-----|-----|---|----|
| MNF_Pot_15  | 43.595  | -86.2657 | MI | 2004 | MNF-Pot-15 | ABRC | 25.2  | 108,543,185 | 107,022,924 | n/a | no  | M | 64 |
| MSGA_10     | 43.2749 | -86.0891 | MI | 2004 | MSGA-10    | ABRC | 41.9  | 108,191,659 | 106,019,404 | 233 | yes | M | 65 |
| MSGA_12     | 43.2749 | -86.0891 | MI | 2004 | MSGA-12    | ABRC | 42.8  | 108,227,214 | 106,032,928 | 240 | yes | M | 66 |
| MSGA_61     | 43.2749 | -86.0891 | MI | 2004 | MSGA-61    | ABRC | 45.5  | 108,210,152 | 106,077,183 | 247 | yes | M | 67 |
| MuskSP_68   | 43.2483 | -86.3368 | MI | 2004 | MuskSP-68  | ABRC | 25.8  | 108,063,297 | 105,588,467 | 215 | yes | M | 68 |
| MuskSP_83   | 43.2483 | -86.3368 | MI | 2004 | MuskSP-83  | ABRC | 29.9  | 108,099,368 | 105,721,042 | 222 | yes | M | 69 |
| Pent_46     | 43.7623 | -86.3929 | MI | 2004 | Pent-46    | ABRC | 48.3  | 108,227,763 | 106,099,890 | 238 | yes | M | 72 |
| Pent_7      | 43.7623 | -86.3929 | MI | 2004 | Pent-7     | ABRC | 55.7  | 108,220,625 | 106,144,167 | 240 | yes | M | 73 |
| SLSP_67     | 43.665  | -86.496  | MI | 2004 | SLSP-67    | ABRC | 53.5  | 108,238,880 | 106,143,530 | 245 | yes | M | 81 |
| SLSP_69     | 43.665  | -86.496  | MI | 2004 | SLSP-69    | ABRC | 35.5  | 108,160,835 | 105,899,252 | 249 | yes | M | 82 |
| KNO2_41     | 41.273  | -86.625  | IN | 2005 | KNO2.41    | ABRC | 44.7  | 108,209,694 | 106,063,235 | 219 | yes | M | 34 |
| KNO2_54     | 41.273  | -86.625  | IN | 2005 | KNO2.54    | ABRC | 44    | 108,212,430 | 105,903,373 | 218 | yes | M | 35 |
| LI_EF_011   | 40.9064 | -73.1493 | NY | 2005 | LI-EF-011  | ABRC | 68.6  | 108,267,109 | 106,250,331 | 259 | yes | M | 38 |
| LI_EF_018   | 40.9064 | -73.1493 | NY | 2005 | LI-EF-018  | ABRC | 39    | 108,244,306 | 105,898,497 | 230 | yes | M | 39 |
| LI_OF_061   | 40.7777 | -72.9069 | NY | 2005 | LI-OF-061  | ABRC | 58    | 104,897,841 | 105,729,196 | n/a | no  | M | 40 |
| LI_RR_096   | 40.9447 | -72.8615 | NY | 2005 | LI-RR-096  | ABRC | 63.5  | 108,264,679 | 106,251,487 | 261 | yes | M | 41 |
| LI_RR_097   | 40.9447 | -72.8615 | NY | 2005 | LI-RR-097  | ABRC | 40.8  | 108,211,310 | 105,992,095 | 249 | yes | M | 42 |
| LI_SET_019  | 40.9352 | -73.114  | NY | 2005 | LI-SET-019 | ABRC | 29.9  | 108,085,297 | 105,737,781 | 259 | yes | M | 43 |
| LI_SET_036  | 40.9352 | -73.114  | NY | 2005 | LI-SET-036 | ABRC | 41.5  | 108,216,592 | 106,006,605 | 238 | yes | M | 44 |
| LI_WP_039   | 40.9076 | -73.2089 | NY | 2005 | LI-WP-039  | ABRC | 104.8 | 108,301,282 | 106,273,259 | 239 | yes | M | 45 |
| LI_WP_041   | 40.9076 | -73.2089 | NY | 2005 | LI-WP-041  | ABRC | 76.5  | 108,287,248 | 106,322,146 | 235 | yes | M | 46 |
| PT1_52      | 41.3423 | -86.7368 | IN | 2005 | PT1.52     | ABRC | 50.6  | 108,240,431 | 106,154,252 | 219 | yes | M | 74 |
| PT1_85      | 41.3423 | -86.7368 | IN | 2005 | PT1.85     | ABRC | 46.1  | 108,220,150 | 106,097,633 | 233 | yes | M | 75 |
| RMX4_118    | 42.036  | -86.511  | MI | 2005 | RMX4.118   | ABRC | 41.8  | 106,178,554 | 105,685,651 | n/a | no  | M | 78 |
| 11PNA1_14   | 42.0945 | -86.3253 | MI | 2006 | 11PNA1.14  | ABRC | 47.5  | 108,227,783 | 106,133,372 | 276 | yes | M | 1  |
| 328PNA062   | 42.0945 | -86.3253 | MI | 2006 | 328PNA062  | ABRC | 47.3  | 108,221,709 | 106,127,272 | 223 | yes | M | 2  |
| 627ME_13Y1  | 42.093  | -86.359  | MI | 2006 | n/a        | ABRC | 53.4  | 107,908,679 | 106,148,671 | n/a | no  | M | 3  |
| 627ME_1MI1  | 42.093  | -86.359  | MI | 2006 | 627ME-1MI1 | ABRC | 57.8  | 108,252,617 | 106,173,403 | 281 | yes | M | 4  |
| 627RMX_1MN4 | 42.0333 | -86.5128 | MI | 2006 | n/a        | ABRC | 43.6  | 106,799,549 | 105,789,469 | n/a | no  | M | 5  |
| 627RMX_1MN5 | 42.0333 | -86.5128 | MI | 2006 | n/a        | ABRC | 50.6  | 106,885,430 | 105,897,441 | n/a | no  | M | 6  |
| BRR107      | 40.8313 | -87.735  | IL | 2006 | BRR107     | ABRC | 28.5  | 108,896,513 | 107,320,745 | n/a | no  | M | 9  |
| BRR12       | 40.8313 | -87.735  | IL | 2006 | BRR12      | ABRC | 43.9  | 108,190,572 | 106,031,493 | 232 | yes | M | 10 |
| BRR23       | 40.8313 | -87.735  | IL | 2006 | BRR23      | ABRC | 30.7  | 108,095,072 | 105,726,913 | 236 | yes | M | 11 |

|           |         |          |    |      |           |      |      |             |             |     |     |   |    |
|-----------|---------|----------|----|------|-----------|------|------|-------------|-------------|-----|-----|---|----|
| BRR4      | 40.8313 | -87.735  | IL | 2006 | BRR4      | ABRC | 44.7 | 108,180,840 | 106,033,507 | 219 | yes | M | 12 |
| BRR57     | 40.8313 | -87.735  | IL | 2006 | BRR57     | ABRC | 28.4 | 108,093,033 | 105,630,963 | 225 | yes | M | 13 |
| BRR60     | 40.8313 | -87.735  | IL | 2006 | BRR60     | ABRC | 42.9 | 108,281,285 | 106,199,572 | 229 | yes | M | 14 |
| KEN       | 41.767  | -72.677  | CT | n/a  | KEN       | ABRC | 55.2 | 108,233,232 | 106,158,223 | 249 | yes | M | 29 |
| LP3413_31 | 41.6862 | -86.8513 | IN | n/a  | LP3413.31 | ABRC | 55.9 | 108,244,332 | 106,190,596 | 227 | yes | M | 47 |
| LP3413_53 | 41.6862 | -86.8513 | IN | n/a  | LP3413.53 | ABRC | 51.2 | 108,157,453 | 105,994,665 | 245 | yes | M | 48 |
| RMX413_85 | 42.036  | -86.511  | MI | n/a  | RMX413.85 | ABRC | 38   | 106,816,221 | 105,483,632 | n/a | no  | M | 79 |

---

**Table S2. Sample information for Col-0 mutation accumulation lines.**

Information about each Mutation Accumulation (MA) line and their number of SNPs at different annotations. Also the total number of SNPs, average number of mutations and total bp covered in the genome per annotation are reported.

| MA line        | Read depth | Generation | Total       | SNPs | Deletions | insertions | CDS | Nonsyn | Syn | Intron     | 5' UTR    | 3' UTR    | TE        | Intergenic |
|----------------|------------|------------|-------------|------|-----------|------------|-----|--------|-----|------------|-----------|-----------|-----------|------------|
| 0-4-26         | 57         | 3          | 7           | 6    | 1         | 0          | 0   | 0      | 0   | 0          | 0         | 0         | 1         | 5          |
| 0-8-87         | 49         | 3          | 7           | 5    | 0         | 2          | 1   | 1      | 0   | 1          | 0         | 0         | 0         | 3          |
| 30-109         | 45         | 31         | 31          | 23   | 7         | 1          | 3   | 3      | 0   | 3          | 0         | 0         | 2         | 15         |
| 30-119         | 45         | 31         | 33          | 26   | 2         | 5          | 1   | 1      | 0   | 1          | 2         | 0         | 4         | 18         |
| 30-29          | 51         | 31         | 39          | 26   | 10        | 3          | 2   | 1      | 1   | 3          | 0         | 1         | 5         | 15         |
| 30-39          | 48         | 31         | 28          | 18   | 7         | 3          | 1   | 1      | 0   | 1          | 0         | 1         | 4         | 11         |
| 30-49          | 50         | 31         | 30          | 23   | 3         | 4          | 4   | 4      | 0   | 0          | 0         | 0         | 6         | 13         |
| 30-59          | 40         | 31         | 46          | 31   | 8         | 7          | 5   | 2      | 3   | 2          | 0         | 0         | 6         | 18         |
| 30-69          | 50         | 31         | 26          | 21   | 3         | 2          | 4   | 3      | 1   | 1          | 1         | 1         | 6         | 8          |
| 30-79          | 50         | 31         | 31          | 25   | 3         | 3          | 6   | 4      | 2   | 2          | 0         | 0         | 8         | 9          |
| 30-89          | 39         | 31         | 35          | 27   | 5         | 3          | 4   | 3      | 1   | 1          | 1         | 0         | 2         | 19         |
| 30-99          | 44         | 31         | 37          | 35   | 1         | 1          | 6   | 5      | 1   | 2          | 0         | 2         | 8         | 17         |
| Total SNPs     |            |            |             | 274  |           |            | 38  | 28     | 10  | 17         | 4         | 5         | 52        | 158        |
| average (31st) |            |            | 33.6        | 25.5 | 4.9       | 3.2        | 3.6 | 2.7    | 0.9 | 1.6        | 0.4       | 0.5       | 5.1       | 14.3       |
| stdev (31st)   |            |            | 5.9         | 4.9  | 3.0       | 1.8        | 1.8 | 1.4    | 1.0 | 1.0        | 0.7       | 0.7       | 2.1       | 3.9        |
| Total bp       |            |            | 115,954,227 |      |           | 30,753,966 |     |        |     | 17,446,837 | 4,289,789 | 2,508,199 | 9,267,413 | 48,090,487 |



**Table S3. Mutation rate estimates for different annotations in HPG1 and mutation accumulation lines.**

Mutation rates from MA lines are compared to HPG1 substitution rates from the dataset of 32\_15 quality filter and complete information (see SOM)  
 (Abbreviations: stat, descriptive statistic; bp, base pairs; lower and upper, lower and upper 95% CI; Nonsyn. and Syn., nonsynonymous and synonymous sites; UTR, untranslated region sites; HPG1 adj., substitution rate of HPG1 adjusted by a mean generation time of 1.3 years)

| Dataset                                  | stat    | CDS      | Syn. | Nonsyn. | Intronic | 5' UTR  | 3' UTR  | Transposon | Intergenic | Genome    |
|------------------------------------------|---------|----------|------|---------|----------|---------|---------|------------|------------|-----------|
| MA                                       | mean    | 3.776    | n/a  | n/a     | 2.958    | 3.008   | 6.431   | 17.752     | 9.592      | 7.094     |
| MA                                       | sem     | 1.928    | n/a  | n/a     | 1.786    | 5.258   | 9.094   | 7.420      | 2.628      | 1.352     |
| MA                                       | lower   | 2.581    | n/a  | n/a     | 1.851    | -0.251  | 0.794   | 13.153     | 7.964      | 6.256     |
| MA                                       | upper   | 4.971    | n/a  | n/a     | 4.065    | 6.267   | 12.067  | 22.351     | 11.221     | 7.932     |
| HPG1                                     | mean    | 2.149    | n/a  | n/a     | 1.540    | n/a     | n/a     | 2.290      | 3.029      | 2.114     |
| HPG1                                     | sem     | 0.108    | n/a  | n/a     | 0.165    | n/a     | n/a     | 0.536      | 0.173      | 0.119     |
| HPG1                                     | lower   | 1.943    | n/a  | n/a     | 1.231    | n/a     | n/a     | 1.314      | 2.698      | 1.871     |
| HPG1                                     | upper   | 2.364    | n/a  | n/a     | 1.874    | n/a     | n/a     | 3.309      | 3.368      | 2.344     |
| HPG1 adj.                                | mean    | 2.794    | n/a  | n/a     | 2.002    | n/a     | n/a     | 2.977      | 3.938      | 2.748     |
| HPG1 adj.                                | sem     | 0.140    | n/a  | n/a     | 0.214    | n/a     | n/a     | 0.697      | 0.225      | 0.154     |
| HPG1 adj.                                | lower   | 2.526    | n/a  | n/a     | 1.600    | n/a     | n/a     | 1.708      | 3.508      | 2.432     |
| HPG1 adj.                                | upper   | 3.073    | n/a  | n/a     | 2.436    | n/a     | n/a     | 4.302      | 4.378      | 3.047     |
| Distribution of pairwise SNP differences | min     | 0        | 0    | 0       | 0        | 0       | 0       | 0          | 0          | 0         |
|                                          | 1st qu. | 2        | 1    | 1       | 1        | 0       | 1       | 2          | 5          | 9         |
|                                          | median  | 5        | 3    | 3       | 3        | 1       | 2       | 4          | 10         | 18        |
|                                          | mean    | 5.6      | 3    | 3.1     | 3.8      | 1.2     | 1.9     | 4.3        | 11.3       | 21.1      |
|                                          | 3rd qu. | 8        | 5    | 4       | 5        | 2       | 3       | 6          | 16         | 31        |
|                                          | max.    | 27       | 17   | 11      | 15       | 5       | 7       | 22         | 43         | 87        |
| Total number of SNPs                     |         | 971      | 531  | 448     | 629      | 74      | 158     | 656        | 2498       | 5013      |
| Total bp                                 |         | 32119233 | n/a  | n/a     | 18132262 | 2632130 | 4480510 | 6209512    | 43601507   | 108434034 |

**Table S4. Description of phenotypic and climatic variables for association mapping analyses.**

Mean and standard deviation (s.d.) across accessions for each phenotypic and climatic variables. Broad sense heritabilities (H2) were calculated from between line and within line (between replicate) variance in ANOVA. P-value corresponds to F test. Narrow sense heritabilities (h2) were calculated employing linear mixed models and kinship matrix from mean accession values. P-values correspond to Likelihood Ratio test.

| Variable      | Description                                                                               | mean  | s.d.   | H2    | p-value  | h2    | p-value  |
|---------------|-------------------------------------------------------------------------------------------|-------|--------|-------|----------|-------|----------|
| FT_V0         | Time from germination until the first flower opens (days) under 0 days of vernalization   | 101   | 4.53   | 0.009 | 7.28E-03 | 0.017 | 1.97E-25 |
| FT_V1         | Time from germination until the first flower opens (days) under 14 days of vernalization  | 107   | 4.12   | 0.013 | 6.87E-04 | 0.395 | 1.83E-25 |
| FT_V2         | Time from germination until the first flower opens (days) under 28 days of vernalization  | 102   | 3.22   | 0.012 | 1.04E-03 | 0.429 | 3.37E-27 |
| FT_V3         | Time from germination until the first flower opens (days) under 63 days of vernalization  | 110   | 1.32   | 0.010 | 5.11E-03 | 0.226 | 9.52E-25 |
| B_V0          | Time from germination until the first developed bud (days) under 0 days of vernalization  | 88.8  | 4      | 0.013 | 8.99E-04 | 0.018 | 2.26E-25 |
| B_V1          | Time from germination until the first developed bud (days) under 14 days of vernalization | 93.9  | 3.84   | 0.009 | 7.45E-03 | 0.340 | 3.98E-25 |
| B_V2          | Time from germination until the first developed bud (days) under 28 days of vernalization | 89.2  | 2.13   | 0.005 | 6.92E-02 | 0.252 | 2.22E-25 |
| B_V3          | Time from germination until the first developed bud (days) under 63 days of vernalization | 101   | 0.45   | 0.006 | 5.79E-02 | 0.177 | 1.99E-24 |
| Fecundity     | Pixel area of inflorescence (correlation with number of fruits, rho=0.84)                 | 0.02  | 0.0042 | 0.001 | 3.56E-01 | 0.240 | 1.02E-22 |
| seed_size     | Average seed size (mm <sup>2</sup> )                                                      | 0.134 | 0.0053 | 0.016 | 4.73E-03 | 0.149 | 3.58E-24 |
| GR_rootLength | Average root growth rate                                                                  | 181   | 14.9   | 0.131 | 4.76E-77 | 0.640 | 3.13E-29 |
| GR_shootArea  | Average of shoot area growth rate                                                         | 2279  | 253    | 0.053 | 2.33E-24 | 0.812 | 1.77E-31 |
| rootLength    | Average root length                                                                       | 467   | 35.8   | 0.048 | 2.01E-21 | 0.409 | 2.57E-28 |

|                  |                                                                                                                                    |       |        |       |          |       |          |
|------------------|------------------------------------------------------------------------------------------------------------------------------------|-------|--------|-------|----------|-------|----------|
| dirEquivalent    | Average root direction index. Score for average pixel-by-pixel deviations from growth relative to vector of gravity                | 0.393 | 0.0277 | 0.059 | 2.62E-28 | 0.544 | 1.14E-26 |
| stdDevXY         | Average root linearity coefficient of linear determination; R2 of linear regression line fitted to pixels of primary root skeleton | 0.725 | 0.0429 | 0.018 | 4.54E-06 | 0.303 | 1.41E-25 |
| meanRootWidth    | Average root width                                                                                                                 | 5.27  | 0.177  | 0.038 | 5.30E-16 | 0.359 | 1.52E-25 |
| rootWidth20      | Average width over first interval of the primary root length (0 to 20%) at hypocotyl/root junction                                 | 5.75  | 0.124  | 0.018 | 5.11E-06 | 0.166 | 3.37E-25 |
| rootWidth40      | Average width over first interval of the primary root length (20 to 40%) at hypocotyl/root junction                                | 5.35  | 0.19   | 0.033 | 3.87E-13 | 0.291 | 1.76E-25 |
| rootWidth60      | Average width over first interval of the primary root length (40 to 60%) at hypocotyl/root junction                                | 5.2   | 0.212  | 0.039 | 1.49E-16 | 0.405 | 6.51E-26 |
| rootWidth80      | Average width over first interval of the primary root length (60 to 80%) at hypocotyl/root junction                                | 5.11  | 0.241  | 0.045 | 4.67E-20 | 0.381 | 5.47E-26 |
| rootWidth100     | Average width over first interval of the primary root length (80 to 100%) at hypocotyl/root junction                               | 4.9   | 0.222  | 0.038 | 4.06E-16 | 0.351 | 8.81E-26 |
| gravitropicDir   | Average root angle between root vector and the vertical axis of the picture (assumed vector of gravity) (°)                        | -7.22 | 2.56   | 0.024 | 7.69E-09 | 0.210 | 4.68E-27 |
| gravitropicScore | Average score for root angle intervals                                                                                             | 0.1   | 0.0457 | 0.044 | 2.83E-19 | 0.642 | 7.56E-27 |
| TotLen.EucLen    | Average root tortuosity: Total root length divided by Euclidian length                                                             | 1.1   | 0.0097 | 0.009 | 6.83E-03 | 0.422 | 2.53E-25 |
| GR.TL            | Average relative root growth rate: Root growth rate divided by total length at the earlier time point                              | 0.673 | 0.0796 | 0.011 | 1.20E-03 | 0.393 | 2.69E-24 |
| BIO1             | Annual Mean Temperature (°C x 10)                                                                                                  | 98.1  | 12.8   | n/a   | n/a      | 0.066 | 3.22E-40 |
| BIO2             | Mean Diurnal Range (Mean of monthly (max temp - min temp))                                                                         | 107   | 7.65   | n/a   | n/a      | 0.073 | 1.02E-40 |
| BIO3             | Isothermality (BIO2/BIO7) (x 100)                                                                                                  | 28.9  | 1.8    | n/a   | n/a      | 0.361 | 4.91E-39 |
| BIO4             | Temperature Seasonality (standard deviation x 100)                                                                                 | 9169  | 483    | n/a   | n/a      | 0.383 | 4.68E-47 |
| BIO5             | Max Temperature of Warmest Month (°C x 10)                                                                                         | 283   | 10.1   | n/a   | n/a      | 0.152 | 3.78E-40 |
| BIO6             | Min Temperature of Coldest Month (°C x 10)                                                                                         | -80.9 | 18     | n/a   | n/a      | 0.275 | 4.79E-42 |
| BIO7             | Temperature Annual Range (BIO5-BIO6) (°C x 10)                                                                                     | 364   | 17.5   | n/a   | n/a      | 0.239 | 6.31E-42 |
| BIO8             | Mean Temperature of Wettest Quarter (°C x 10)                                                                                      | 176   | 55.1   | n/a   | n/a      | 0.016 | 3.58E-43 |

|       |                                                      |       |      |     |     |       |          |
|-------|------------------------------------------------------|-------|------|-----|-----|-------|----------|
| BIO9  | Mean Temperature of Driest Quarter (°C x 10)         | -7.11 | 48.7 | n/a | n/a | 0.000 | 3.58E-43 |
| BIO10 | Mean Temperature of Warmest Quarter (°C x 10)        | 213   | 10.8 | n/a | n/a | 0.205 | 3.33E-40 |
| BIO11 | Mean Temperature of Coldest Quarter (°C x 10)        | -24.1 | 18.2 | n/a | n/a | 0.270 | 1.71E-41 |
| BIO12 | Annual Precipitation (mm)                            | 990   | 109  | n/a | n/a | 0.219 | 3.94E-44 |
| BIO13 | Precipitation of Wettest Month (mm)                  | 103   | 6.72 | n/a | n/a | 0.206 | 1.53E-40 |
| BIO14 | Precipitation of Driest Month (mm)                   | 54.1  | 16.7 | n/a | n/a | 0.104 | 1.51E-40 |
| BIO15 | Precipitation Seasonality (Coefficient of Variation) | 17.8  | 5.51 | n/a | n/a | 0.157 | 8.93E-40 |
| BIO16 | Precipitation of Wettest Quarter (mm)                | 291   | 19.7 | n/a | n/a | 0.269 | 1.55E-42 |
| BIO17 | Precipitation of Driest Quarter (mm)                 | 191   | 44.8 | n/a | n/a | 0.084 | 3.67E-42 |
| BIO18 | Precipitation of Warmest Quarter (mm)                | 277   | 25.2 | n/a | n/a | 0.342 | 7.42E-44 |
| BIO19 | Precipitation of Coldest Quarter (mm)                | 197   | 47   | n/a | n/a | 0.022 | 2.68E-42 |

---

**Table S5. SNP hits from association analyses and several descriptors.**

SNP hits significant at the 5% level after permutation correction are shown. Additionally, if raw p-values pass a double Bonferroni threshold of 0.01% are marked with a "tick". (Abbreviations: nonsyn. and syn., nonsynonymous and synonymous changes; regular one-letter abbreviation was used for amino acid changes)

| Trait            | Chromosome | Position | Ancestral | Derived | Effect   | Effect standard error | Sample size | p - value raw | p- value false discovery rate | p- value permutation corrected | Allele frequency | Allele frequency in modern set | Oldest herbarium individual | Longitude | Latitude | Substitution type | AA change | Gene | Biochemical effect (Grantham score) | Significant permutation | Significant double Bonferroni | LD |    |
|------------------|------------|----------|-----------|---------|----------|-----------------------|-------------|---------------|-------------------------------|--------------------------------|------------------|--------------------------------|-----------------------------|-----------|----------|-------------------|-----------|------|-------------------------------------|-------------------------|-------------------------------|----|----|
| dirEquivalent    | 1          | 958948   | G         | T       | -0.014   | 0.004                 | 63          | 5.30E-04      | 0.0052                        | 0.018                          | 0.186            | 0.227                          | 1922                        | 41.7      | -85.3    | nonsyn A->P       | AT1G03810 | 27   | ✓                                   |                         |                               | 53 |    |
| gravitropicScore | 1          | 9925177  | C         | T       | 0.033    | 0.010                 | 63          | 7.10E-04      | 0.0651                        | 0.016                          | 0.078            | 0.092                          | 1952                        | 40.9      | -82.3    | interg.           |           |      |                                     | ✓                       |                               | 1  |    |
| bio18            | 1          | 10187610 | T         | C       | 6.830    | 1.987                 | 99          | 5.83E-04      | 0.0124                        | 0.047                          | 0.196            | 0.24                           | 1922                        | 41.7      | -85.3    | interg.           |           |      |                                     | ✓                       |                               |    | 52 |
| GR_rootLength    | 1          | 12638692 | C         | T       | -12.100  | 3.164                 | 63          | 1.33E-04      | 0.0037                        | 0.003                          | 0.087            | 0.105                          | 1952                        | 40.9      | -81.3    | interg.           |           |      |                                     | ✓                       | ✓                             |    | 13 |
| GR_shootArea     | 1          | 12638692 | C         | T       | -231.000 | 53.774                | 63          | 1.75E-05      | 0.0005                        | 0.001                          | 0.087            | 0.105                          | 1952                        | 40.9      | -81.3    | interg.           |           |      |                                     | ✓                       | ✓                             |    | 13 |
| GR_rootLength    | 1          | 13652509 | C         | A       | -12.100  | 3.164                 | 63          | 1.33E-04      | 0.0037                        | 0.003                          | 0.093            | 0.107                          | 1952                        | 40.9      | -82.9    | interg.           |           |      |                                     | ✓                       | ✓                             |    | 12 |
| GR_shootArea     | 1          | 13652509 | C         | A       | -231.000 | 53.774                | 63          | 1.75E-05      | 0.0005                        | 0.001                          | 0.093            | 0.107                          | 1952                        | 40.9      | -82.9    | interg.           |           |      |                                     | ✓                       | ✓                             |    | 12 |
| bio18            | 1          | 13904611 | C         | T       | 6.570    | 1.756                 | 90          | 1.83E-04      | 0.0124                        | 0.016                          | 0.217            | 0.237                          | 1922                        | 41.7      | -85.3    | interg.           |           |      |                                     | ✓                       |                               |    | 49 |
| bio18            | 1          | 13994958 | G         | A       | 6.830    | 1.987                 | 99          | 5.83E-04      | 0.0124                        | 0.047                          | 0.196            | 0.24                           | 1922                        | 41.7      | -85.3    | tranposon         | AT1G36933 |      |                                     | ✓                       |                               |    | 49 |
| bio18            | 1          | 17408807 | C         | T       | 6.830    | 1.987                 | 99          | 5.83E-04      | 0.0124                        | 0.047                          | 0.196            | 0.24                           | 1922                        | 41.7      | -85.3    | interg.           |           |      |                                     | ✓                       |                               |    | 48 |
| dirEquivalent    | 1          | 19024876 | C         | T       | -0.014   | 0.004                 | 63          | 5.30E-04      | 0.0052                        | 0.018                          | 0.19             | 0.23                           | 1922                        | 41.7      | -85.3    | interg.           |           |      |                                     | ✓                       |                               |    | 47 |
| GR_shootArea     | 1          | 20324050 | G         | A       | -231.000 | 53.774                | 63          | 1.75E-05      | 0.0005                        | 0.001                          | 0.087            | 0.105                          | 1952                        | 40.9      | -82.9    | interg.           | AT1G54440 |      |                                     | ✓                       | ✓                             |    | 11 |
| GR_rootLength    | 1          | 20324050 | G         | A       | -12.100  | 3.164                 | 63          | 1.33E-04      | 0.0037                        | 0.003                          | 0.087            | 0.105                          | 1952                        | 40.9      | -82.9    | interg.           | AT1G54440 |      |                                     | ✓                       | ✓                             |    | 11 |
| bio18            | 1          | 23648407 | A         | C       | 6.830    | 1.987                 | 99          | 5.83E-04      | 0.0124                        | 0.047                          | 0.196            | 0.24                           | 1922                        | 41.7      | -85.3    | nonsyn Y->S       | AT1G63740 | 144  |                                     | ✓                       |                               |    | 46 |
| dirEquivalent    | 1          | 26052913 | A         | T       | -0.014   | 0.004                 | 63          | 5.30E-04      | 0.0052                        | 0.018                          | 0.185            | 0.224                          | 1922                        | 41.7      | -85.3    | interg.           |           |      |                                     | ✓                       |                               |    | 45 |
| GR_shootArea     | 1          | 29696198 | G         | A       | -121.000 | 33.911                | 63          | 3.68E-04      | 0.0096                        | 0.016                          | 0.278            | 0.329                          | 1922                        | 41.5      | -84.9    | interg.           |           |      |                                     | ✓                       |                               |    | 42 |

|                  |   |          |   |   |          |        |    |          |        |       |       |       |      |      |       |             |           |    |    |    |    |
|------------------|---|----------|---|---|----------|--------|----|----------|--------|-------|-------|-------|------|------|-------|-------------|-----------|----|----|----|----|
| bio16            | 1 | 29696198 | G | A | 5.250    | 1.377  | 94 | 1.39E-04 | 0.0632 | 0.016 | 0.278 | 0.329 | 1922 | 41.5 | -84.9 | interg.     |           | ✓  | 42 |    |    |
| bio18            | 1 | 29696198 | G | A | 6.340    | 1.569  | 94 | 5.36E-05 | 0.0124 | 0.004 | 0.278 | 0.329 | 1922 | 41.5 | -84.9 | interg.     |           | ✓  | 42 |    |    |
| GR_rootLength    | 1 | 30015381 | T | A | -12.100  | 3.164  | 63 | 1.33E-04 | 0.0037 | 0.003 | 0.087 | 0.105 | 1952 | 40.9 | -82.9 | interg.     |           | ✓  | ✓  | 10 |    |
| GR_shootArea     | 1 | 30015381 | T | A | -231.000 | 53.774 | 63 | 1.75E-05 | 0.0005 | 0.001 | 0.087 | 0.105 | 1952 | 40.9 | -82.9 | interg.     |           | ✓  | ✓  | 10 |    |
| GR_rootLength    | 1 | 30143319 | G | A | -12.100  | 3.164  | 63 | 1.33E-04 | 0.0037 | 0.003 | 0.088 | 0.105 | 1952 | 40.9 | -82.9 | interg.     |           | ✓  | ✓  | 9  |    |
| GR_shootArea     | 1 | 30143319 | G | A | -231.000 | 53.774 | 63 | 1.75E-05 | 0.0005 | 0.001 | 0.088 | 0.105 | 1952 | 40.9 | -82.9 | interg.     |           | ✓  | ✓  | 9  |    |
| dirEquivalent    | 2 | 358395   | C | T | -0.016   | 0.004  | 63 | 1.15E-04 | 0.0032 | 0.006 | 0.194 | 0.237 | 1922 | 41.7 | -85.3 | syn. V->V   | AT2G01820 | ✓  | ✓  | 43 |    |
| dirEquivalent    | 2 | 585918   | C | T | -0.016   | 0.004  | 63 | 1.15E-04 | 0.0032 | 0.006 | 0.194 | 0.237 | 1922 | 41.7 | -85.3 | syn. G->G   | AT2G02220 | ✓  | ✓  | 42 |    |
| dirEquivalent    | 2 | 1093203  | C | T | -0.016   | 0.004  | 63 | 1.15E-04 | 0.0032 | 0.006 | 0.194 | 0.237 | 1922 | 41.7 | -85.3 | interg.     |           | ✓  | ✓  | 41 |    |
| dirEquivalent    | 2 | 2176891  | T | C | -0.016   | 0.004  | 63 | 1.15E-04 | 0.0032 | 0.006 | 0.194 | 0.237 | 1922 | 41.7 | -85.3 | interg.     |           | ✓  | ✓  | 40 |    |
| GR_rootLength    | 2 | 3174832  | T | A | 6.340    | 1.869  | 63 | 6.97E-04 | 0.017  | 0.017 | 0.529 | 0.566 | 1879 | 41.3 | -84.3 | interg.     |           | ✓  |    | 0  |    |
| TotLen.EucLen    | 2 | 5285907  | C | A | -0.006   | 0.002  | 63 | 3.05E-04 | 0.0241 | 0.037 | 0.162 | 0.194 | 1922 | 41.5 | -85   | interg.     |           | ✓  | ✓  | 39 |    |
| dirEquivalent    | 2 | 5285907  | C | A | -0.019   | 0.005  | 63 | 2.64E-05 | 0.0032 | 0.001 | 0.162 | 0.194 | 1922 | 41.5 | -85   | interg.     |           | ✓  | ✓  | 39 |    |
| dirEquivalent    | 2 | 6034545  | C | T | -0.016   | 0.004  | 63 | 1.15E-04 | 0.0032 | 0.006 | 0.194 | 0.237 | 1922 | 41.7 | -85.3 | syn. S->S   | AT2G14247 | ✓  | ✓  | 38 |    |
| dirEquivalent    | 2 | 7047529  | G | T | -0.016   | 0.004  | 63 | 1.15E-04 | 0.0032 | 0.006 | 0.194 | 0.237 | 1922 | 41.7 | -85.3 | nonsyn P->A | AT2G16270 | 27 | ✓  | ✓  | 37 |
| dirEquivalent    | 2 | 7186220  | C | T | -0.016   | 0.004  | 63 | 1.15E-04 | 0.0032 | 0.006 | 0.194 | 0.237 | 1922 | 41.7 | -85.3 | intron      | AT2G16580 |    | ✓  | ✓  | 36 |
| dirEquivalent    | 2 | 10369545 | T | C | -0.016   | 0.004  | 63 | 1.15E-04 | 0.0032 | 0.006 | 0.194 | 0.237 | 1922 | 41.7 | -85.3 | interg.     |           | ✓  | ✓  | 35 |    |
| dirEquivalent    | 2 | 10495275 | A | C | -0.016   | 0.004  | 63 | 1.15E-04 | 0.0032 | 0.006 | 0.196 | 0.237 | 1922 | 41.7 | -85.3 | intron      | AT2G24680 |    | ✓  | ✓  | 34 |
| dirEquivalent    | 2 | 11346211 | C | A | -0.014   | 0.004  | 63 | 5.30E-04 | 0.0052 | 0.018 | 0.186 | 0.227 | 1922 | 41.7 | -85.3 | interg.     |           | ✓  |    | 33 |    |
| dirEquivalent    | 2 | 12415084 | T | A | -0.014   | 0.004  | 63 | 5.30E-04 | 0.0052 | 0.018 | 0.186 | 0.227 | 1922 | 41.7 | -85.3 | intron      | AT2G28900 |    | ✓  |    | 32 |
| dirEquivalent    | 2 | 12876361 | A | C | -0.015   | 0.004  | 63 | 1.56E-04 | 0.0041 | 0.006 | 0.262 | 0.29  | 1922 | 41.7 | -84.6 | interg.     |           | ✓  |    | 31 |    |
| gravitropicScore | 2 | 12876361 | A | C | -0.021   | 0.006  | 63 | 1.08E-03 | 0.0651 | 0.027 | 0.262 | 0.29  | 1922 | 41.7 | -84.6 | interg.     |           | ✓  |    | 31 |    |
| bio13            | 2 | 14417366 | A | G | 3.990    | 0.959  | 64 | 3.22E-05 | 0.0147 | 0.004 | 0.077 | 0     | 1890 | 39.5 | -77.9 | interg.     |           | ✓  |    | 1  |    |
| dirEquivalent    | 2 | 15278350 | A | G | -0.014   | 0.004  | 63 | 5.30E-04 | 0.0052 | 0.018 | 0.186 | 0.227 | 1922 | 41.7 | -85.3 | interg.     |           | ✓  |    | 30 |    |
| GR_shootArea     | 2 | 16039488 | T | G | -231.000 | 53.774 | 63 | 1.75E-05 | 0.0005 | 0.001 | 0.087 | 0.105 | 1952 | 40.9 | -82.9 | 3' UTR      | AT2G38290 |    | ✓  | ✓  | 8  |
| GR_rootLength    | 2 | 16039488 | T | G | -12.100  | 3.164  | 63 | 1.33E-04 | 0.0037 | 0.003 | 0.087 | 0.105 | 1952 | 40.9 | -82.9 | 3' UTR      | AT2G38290 |    | ✓  | ✓  | 8  |
| GR_rootLength    | 2 | 16247290 | G | T | -12.100  | 3.164  | 63 | 1.33E-04 | 0.0037 | 0.003 | 0.088 | 0.105 | 1952 | 40.9 | -82.9 | nonsyn A->G | AT2G38910 | 60 | ✓  | ✓  | 7  |
| GR_shootArea     | 2 | 16247290 | G | T | -231.000 | 53.774 | 63 | 1.75E-05 | 0.0005 | 0.001 | 0.088 | 0.105 | 1952 | 40.9 | -82.9 | nonsyn A->G | AT2G38910 | 60 | ✓  | ✓  | 7  |
| dirEquivalent    | 2 | 16333662 | G | A | -0.014   | 0.004  | 63 | 5.30E-04 | 0.0052 | 0.018 | 0.186 | 0.227 | 1922 | 41.7 | -85.3 | nonsyn A->G | AT2G39160 | 60 | ✓  |    | 29 |
| dirEquivalent    | 3 | 2500258  | C | A | -0.016   | 0.004  | 63 | 1.15E-04 | 0.0032 | 0.006 | 0.194 | 0.237 | 1922 | 41.7 | -85.3 | syn. K->K   | AT3G07830 |    | ✓  | ✓  | 28 |
| dirEquivalent    | 3 | 3154804  | C | T | -0.016   | 0.004  | 63 | 1.15E-04 | 0.0032 | 0.006 | 0.194 | 0.237 | 1922 | 41.7 | -85.3 | interg.     |           | ✓  | ✓  | 27 |    |
| dirEquivalent    | 3 | 3629794  | C | T | -0.016   | 0.004  | 63 | 1.15E-04 | 0.0032 | 0.006 | 0.194 | 0.237 | 1922 | 41.7 | -85.3 | intron      | AT3G11530 |    | ✓  | ✓  | 26 |
| dirEquivalent    | 3 | 4269626  | G | T | -0.016   | 0.004  | 63 | 1.15E-04 | 0.0032 | 0.006 | 0.194 | 0.237 | 1922 | 41.7 | -85.3 | 5' UTR      | AT3G13229 |    | ✓  | ✓  | 25 |
| GR_shootArea     | 3 | 8873116  | C | T | -231.000 | 53.774 | 63 | 1.75E-05 | 0.0005 | 0.001 | 0.097 | 0.118 | 1952 | 40.9 | -81.9 | interg.     |           | ✓  | ✓  | 6  |    |
| GR_rootLength    | 3 | 8873116  | C | T | -12.100  | 3.164  | 63 | 1.33E-04 | 0.0037 | 0.003 | 0.097 | 0.118 | 1952 | 40.9 | -81.9 | interg.     |           | ✓  | ✓  | 6  |    |

|                  |   |          |   |   |          |        |    |          |        |       |       |       |      |      |       |             |           |     |   |    |
|------------------|---|----------|---|---|----------|--------|----|----------|--------|-------|-------|-------|------|------|-------|-------------|-----------|-----|---|----|
| GR_rootLength    | 3 | 11259214 | A | T | -12.100  | 3.164  | 63 | 1.33E-04 | 0.0037 | 0.003 | 0.088 | 0.105 | 1952 | 40.9 | -82.9 | interg.     |           | ✓   | ✓ | 5  |
| GR_shootArea     | 3 | 11259214 | A | T | -231.000 | 53.774 | 63 | 1.75E-05 | 0.0005 | 0.001 | 0.088 | 0.105 | 1952 | 40.9 | -82.9 | interg.     |           | ✓   | ✓ | 5  |
| bio8             | 3 | 11873293 | A | G | 37.800   | 8.736  | 65 | 1.52E-05 | 0.0069 | 0.006 | 0.939 | 1     | 1890 | 41.8 | -83.7 | transposon  | AT3G30219 | ✓   |   | 0  |
| GR_rootLength    | 3 | 15050751 | G | A | -12.100  | 3.164  | 63 | 1.33E-04 | 0.0037 | 0.003 | 0.108 | 0.105 | 1888 | 40.2 | -82.5 | interg.     |           | ✓   | ✓ | 4  |
| GR_shootArea     | 3 | 15050751 | G | A | -231.000 | 53.774 | 63 | 1.75E-05 | 0.0005 | 0.001 | 0.108 | 0.105 | 1888 | 40.2 | -82.5 | interg.     |           | ✓   | ✓ | 4  |
| dirEquivalent    | 3 | 17164638 | C | A | -0.014   | 0.004  | 63 | 5.30E-04 | 0.0052 | 0.018 | 0.19  | 0.227 | 1922 | 41.7 | -85.3 | interg.     |           | ✓   |   | 24 |
| bio18            | 4 | 279210   | T | G | 6.830    | 1.987  | 99 | 5.83E-04 | 0.0124 | 0.047 | 0.196 | 0.24  | 1922 | 41.7 | -85.3 | interg.     |           | ✓   |   | 22 |
| bio11            | 4 | 1732480  | T | A | -5.550   | 1.564  | 79 | 3.89E-04 | 0.0195 | 0.045 | 0.063 | 0.068 | 2002 | 41   | -87.5 | interg.     |           | ✓   |   | 2  |
| bio4             | 4 | 1732480  | T | A | 224.000  | 63.967 | 79 | 4.67E-04 | 0.0128 | 0.044 | 0.063 | 0.068 | 2002 | 41   | -87.5 | interg.     |           | ✓   |   | 2  |
| dirEquivalent    | 4 | 3355152  | C | G | -0.014   | 0.004  | 63 | 4.45E-04 | 0.0052 | 0.016 | 0.204 | 0.25  | 1922 | 41.7 | -85.4 | interg.     |           | ✓   |   | 21 |
| bio18            | 4 | 3355152  | C | G | 6.850    | 1.944  | ## | 4.25E-04 | 0.0124 | 0.035 | 0.204 | 0.25  | 1922 | 41.7 | -85.4 | interg.     |           | ✓   |   | 21 |
| dirEquivalent    | 4 | 3355946  | G | C | -0.014   | 0.004  | 63 | 4.45E-04 | 0.0052 | 0.016 | 0.204 | 0.25  | 1922 | 41.7 | -85.4 | interg.     |           | ✓   |   | 20 |
| bio18            | 4 | 3355946  | G | C | 6.850    | 1.944  | ## | 4.25E-04 | 0.0124 | 0.035 | 0.204 | 0.25  | 1922 | 41.7 | -85.4 | interg.     |           | ✓   |   | 20 |
| dirEquivalent    | 4 | 4228138  | A | G | -0.014   | 0.004  | 63 | 4.45E-04 | 0.0052 | 0.016 | 0.196 | 0.24  | 1922 | 41.7 | -85.3 | transposon  | AT4G07440 | ✓   |   | 19 |
| bio18            | 4 | 4228138  | A | G | 6.830    | 1.987  | 99 | 5.83E-04 | 0.0124 | 0.047 | 0.196 | 0.24  | 1922 | 41.7 | -85.3 | transposon  | AT4G07440 | ✓   |   | 19 |
| dirEquivalent    | 4 | 9046942  | G | C | -0.014   | 0.004  | 63 | 4.45E-04 | 0.0052 | 0.016 | 0.204 | 0.25  | 1922 | 41.7 | -85.4 | nonsyn H->Q | AT4G15960 | 24  | ✓ | 18 |
| bio18            | 4 | 9046942  | G | C | 6.850    | 1.944  | ## | 4.25E-04 | 0.0124 | 0.035 | 0.204 | 0.25  | 1922 | 41.7 | -85.4 | nonsyn H->Q | AT4G15960 | 24  | ✓ | 18 |
| dirEquivalent    | 4 | 11948961 | T | A | -0.014   | 0.004  | 63 | 4.45E-04 | 0.0052 | 0.016 | 0.198 | 0.25  | 1952 | 41.7 | -85.3 | interg.     |           | ✓   |   | 17 |
| dirEquivalent    | 4 | 12365323 | C | T | -0.014   | 0.004  | 63 | 4.45E-04 | 0.0052 | 0.016 | 0.204 | 0.25  | 1922 | 41.7 | -85.4 | interg.     |           | ✓   |   | 16 |
| bio18            | 4 | 12365323 | C | T | 6.850    | 1.944  | ## | 4.25E-04 | 0.0124 | 0.035 | 0.204 | 0.25  | 1922 | 41.7 | -85.4 | interg.     |           | ✓   |   | 16 |
| dirEquivalent    | 4 | 15646341 | C | A | -0.014   | 0.004  | 63 | 4.45E-04 | 0.0052 | 0.016 | 0.206 | 0.25  | 1922 | 41.7 | -85.4 | syn. E->E   | AT4G32410 |     | ✓ | 15 |
| bio18            | 4 | 15646341 | C | A | 6.720    | 1.936  | 99 | 5.14E-04 | 0.0124 | 0.042 | 0.206 | 0.25  | 1922 | 41.7 | -85.4 | syn. E->E   | AT4G32410 |     | ✓ | 15 |
| dirEquivalent    | 4 | 15845001 | A | T | -0.014   | 0.004  | 63 | 4.45E-04 | 0.0052 | 0.016 | 0.194 | 0.25  | 1922 | 41.8 | -85.9 | 3' UTR      | AT4G32840 |     | ✓ | 14 |
| dirEquivalent    | 4 | 18249171 | T | A | -0.014   | 0.004  | 63 | 4.45E-04 | 0.0052 | 0.016 | 0.274 | 0.328 | 1922 | 41.8 | -85.9 | interg.     |           | ✓   |   | 13 |
| bio18            | 4 | 18249171 | T | A | 6.910    | 2.005  | 71 | 5.62E-04 | 0.0124 | 0.047 | 0.274 | 0.328 | 1922 | 41.8 | -85.9 | interg.     |           | ✓   |   | 13 |
| bio18            | 5 | 4245213  | A | T | 6.830    | 1.987  | 99 | 5.83E-04 | 0.0124 | 0.047 | 0.196 | 0.24  | 1922 | 41.7 | -85.3 | syn. I->I   | AT5G13260 |     | ✓ | 12 |
| bio18            | 5 | 4500202  | G | A | 6.830    | 1.987  | 99 | 5.83E-04 | 0.0124 | 0.047 | 0.196 | 0.24  | 1922 | 41.7 | -85.3 | nonsyn A->G | AT5G13950 | 60  | ✓ | 11 |
| dirEquivalent    | 5 | 4797923  | A | T | -0.014   | 0.004  | 63 | 5.30E-04 | 0.0052 | 0.018 | 0.188 | 0.227 | 1922 | 41.7 | -85.3 | transposon  | AT5G14830 |     | ✓ | 10 |
| dirEquivalent    | 5 | 4797976  | G | A | -0.014   | 0.004  | 63 | 5.30E-04 | 0.0052 | 0.018 | 0.257 | 0.293 | 1922 | 41.7 | -85.3 | transposon  | AT5G14830 |     | ✓ | 10 |
| dirEquivalent    | 5 | 4798526  | A | G | -0.014   | 0.004  | 63 | 5.30E-04 | 0.0052 | 0.018 | 0.339 | 0.362 | 1922 | 41.7 | -85.3 | interg.     |           | ✓   |   | 9  |
| gravitropicScore | 5 | 6508329  | A | G | -0.020   | 0.006  | 63 | 5.20E-04 | 0.0651 | 0.008 | 0.35  | 0.447 | 1922 | 42   | -85   | nonsyn C->W | AT5G19330 | 215 | ✓ | 0  |
| dirEquivalent    | 5 | 11090365 | T | A | -0.014   | 0.004  | 63 | 5.30E-04 | 0.0052 | 0.018 | 0.186 | 0.224 | 1922 | 41.7 | -85.3 | TE          | AT5G29037 |     | ✓ | 4  |
| dirEquivalent    | 5 | 12312975 | C | G | -0.014   | 0.004  | 63 | 5.30E-04 | 0.0052 | 0.018 | 0.185 | 0.224 | 1922 | 41.7 | -85.3 | TE          | AT5G32630 |     | ✓ | 3  |
| dirEquivalent    | 5 | 12358159 | C | T | -0.014   | 0.004  | 63 | 5.30E-04 | 0.0052 | 0.018 | 0.186 | 0.224 | 1922 | 41.7 | -85.3 | transposon  | AT5G32825 |     | ✓ | 2  |
| dirEquivalent    | 5 | 12409027 | G | A | -0.014   | 0.004  | 63 | 5.30E-04 | 0.0052 | 0.018 | 0.185 | 0.224 | 1922 | 41.7 | -85.3 | interg.     |           | ✓   |   | 1  |



|               |   |          |   |   |          |        |    |          |        |       |       |       |      |      |       |         |           |   |   |   |
|---------------|---|----------|---|---|----------|--------|----|----------|--------|-------|-------|-------|------|------|-------|---------|-----------|---|---|---|
| GR_rootLength | 5 | 16024197 | A | T | -12.100  | 3.164  | 63 | 1.33E-04 | 0.0037 | 0.003 | 0.098 | 0.118 | 1952 | 40.9 | -81.9 | intron  | AT5G40020 | ✓ | ✓ | 2 |
| GR_shootArea  | 5 | 16024197 | A | T | -231.000 | 53.774 | 63 | 1.75E-05 | 0.0005 | 0.001 | 0.098 | 0.118 | 1952 | 40.9 | -81.9 | intron  | AT5G40020 | ✓ | ✓ | 2 |
| GR_shootArea  | 5 | 16109431 | G | A | -231.000 | 53.774 | 63 | 1.75E-05 | 0.0005 | 0.001 | 0.865 | 0.877 | 1993 | 42.2 | -84.4 | interg. |           | ✓ | ✓ | 1 |
| GR_rootLength | 5 | 16109431 | G | A | -12.100  | 3.164  | 63 | 1.33E-04 | 0.0037 | 0.003 | 0.865 | 0.877 | 1993 | 42.2 | -84.4 | interg. |           | ✓ | ✓ | 1 |
| dirEquivalent | 5 | 19099082 | G | C | -0.014   | 0.004  | 63 | 5.30E-04 | 0.0052 | 0.018 | 0.186 | 0.227 | 1922 | 41.7 | -85.3 | interg. |           | ✓ |   | 0 |
| GR_rootLength | 5 | 20388107 | A | T | -10.700  | 3.164  | 63 | 6.94E-04 | 0.017  | 0.017 | 0.099 | 0.12  | 2002 | 41   | -86.6 | interg. |           | ✓ |   | 0 |

# Graphic Table S7

## GR\_rootLength

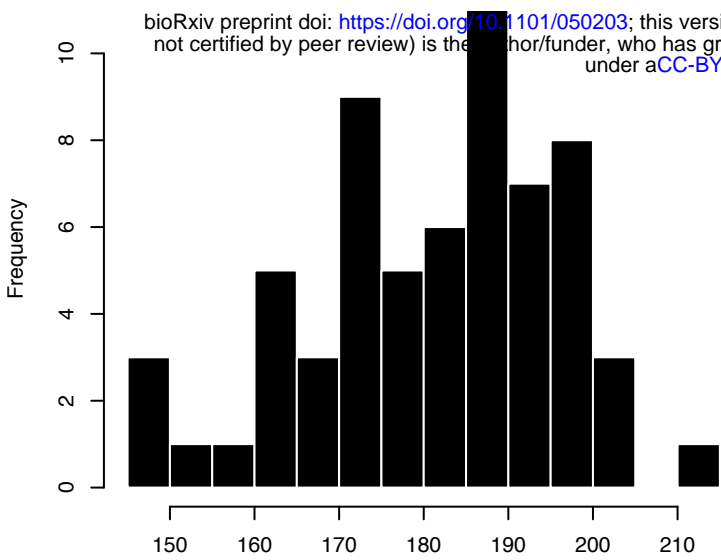

## lambda 0.983

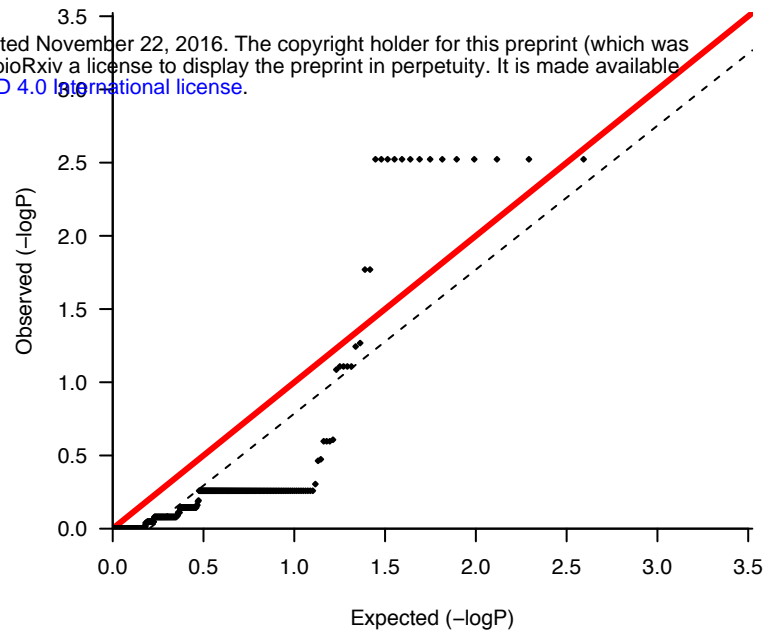

## GR\_shootArea

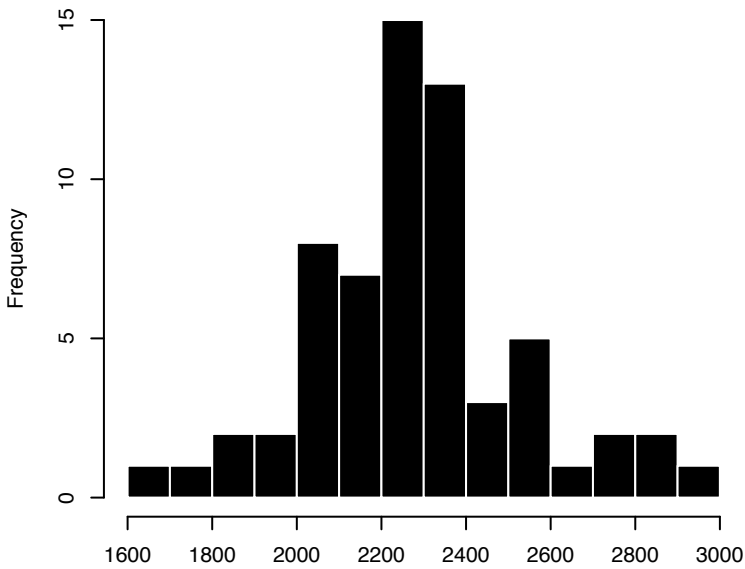

## lambda 1.383

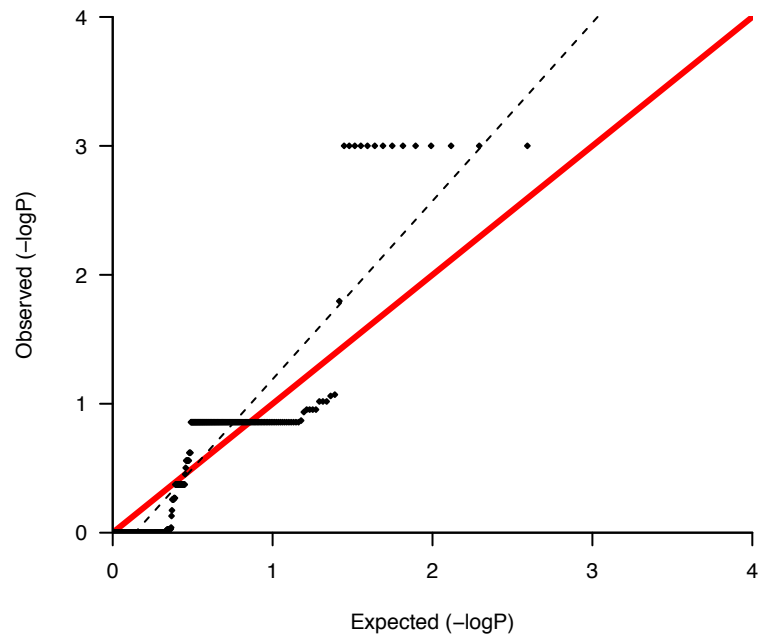

## rootLength

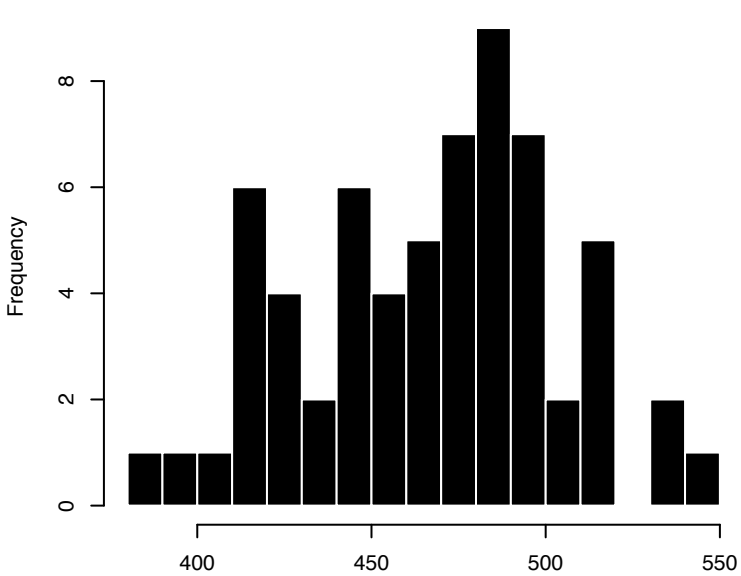

## lambda 0.244

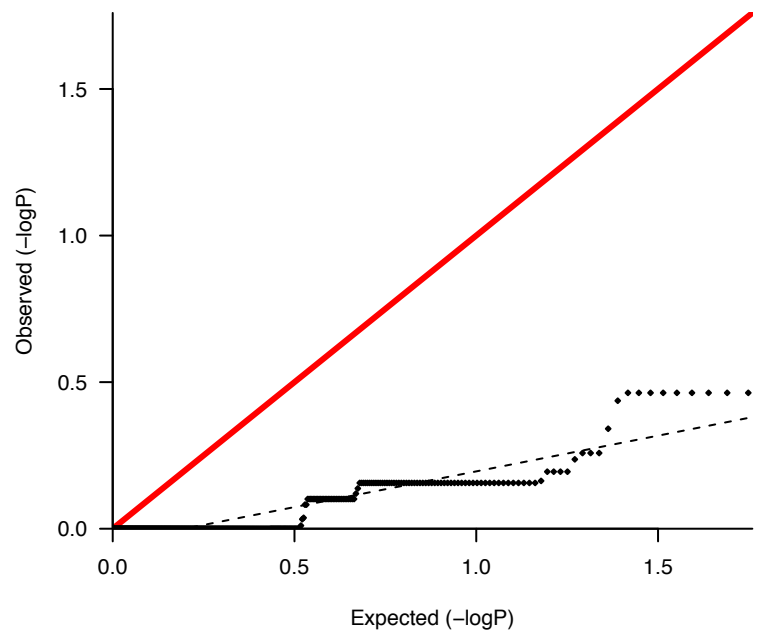

**dirEquivalent**

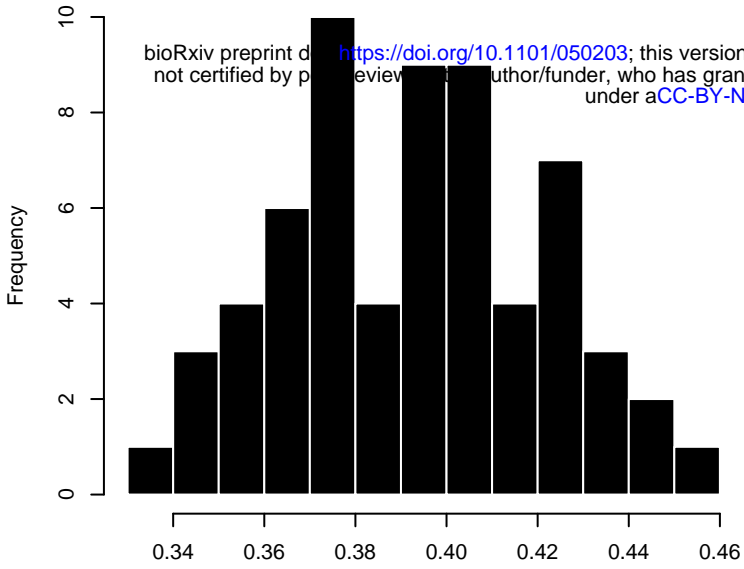

**lambda 1.355**

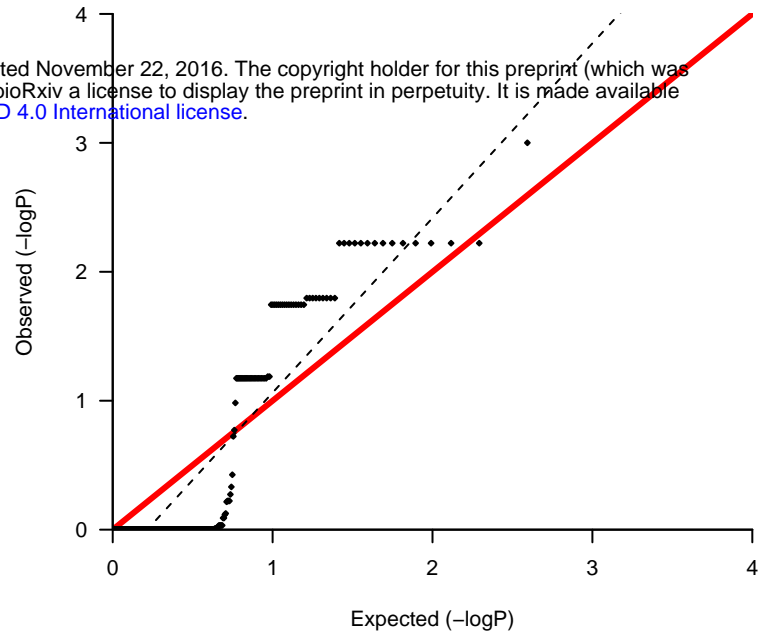

**stdDevXY**

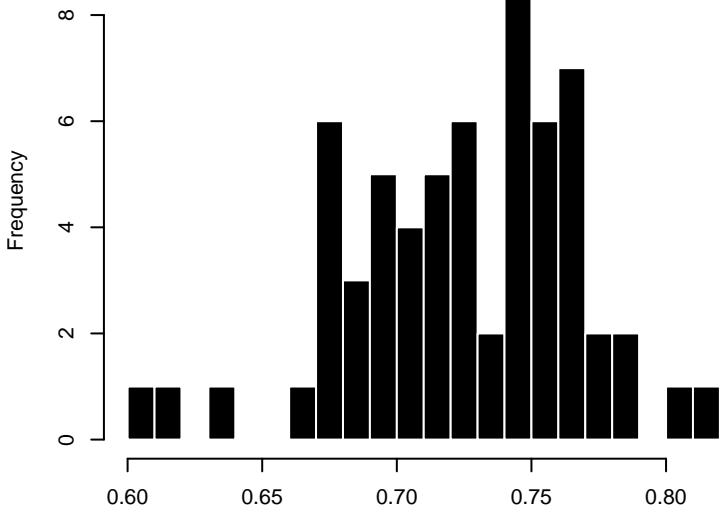

**lambda 0.481**

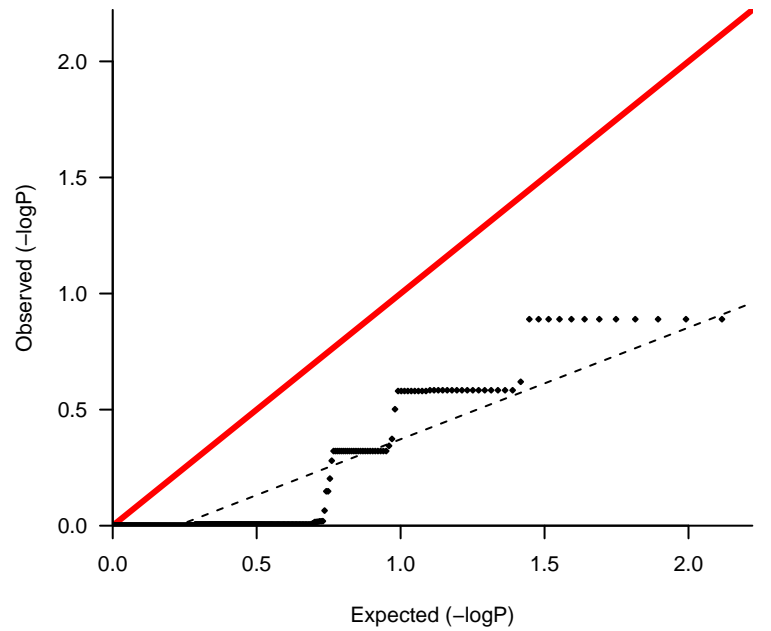

**meanRootWidth**

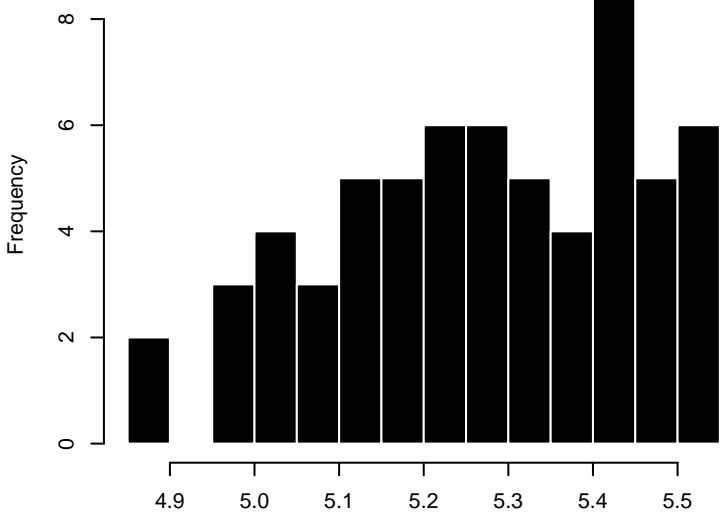

**lambda 0.054**

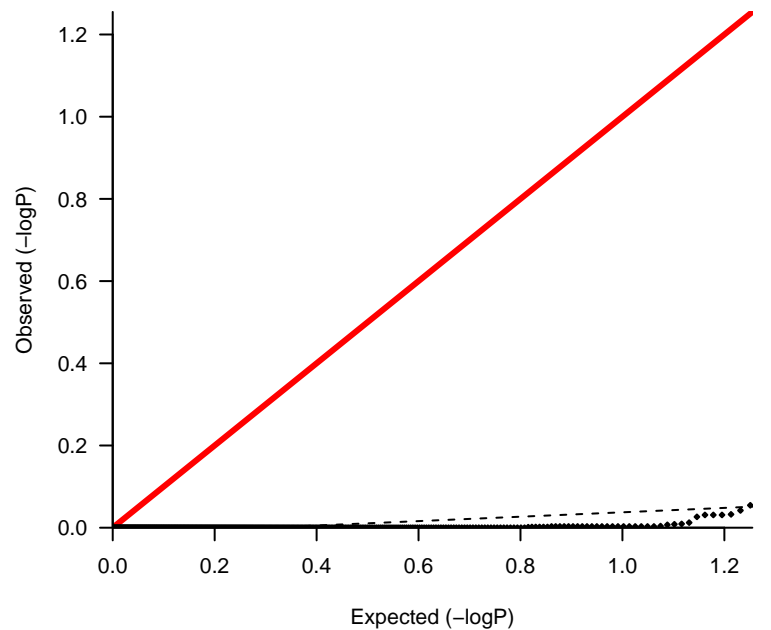

**rootWidth20**

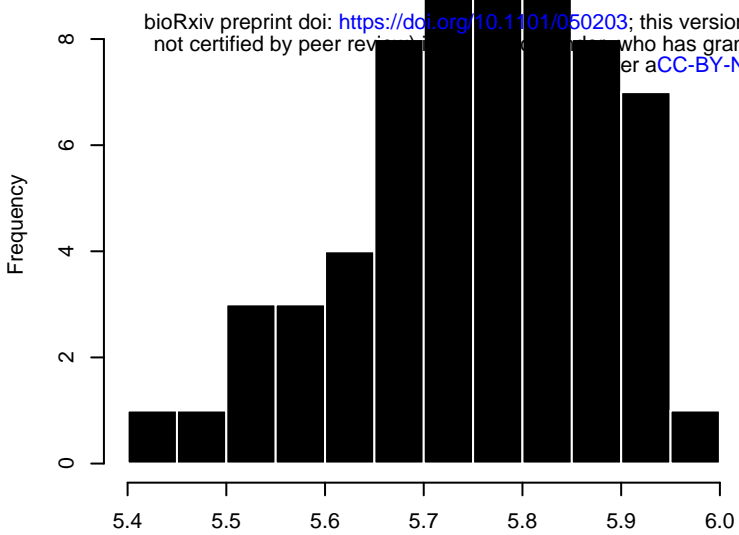

**lambda 0.002**

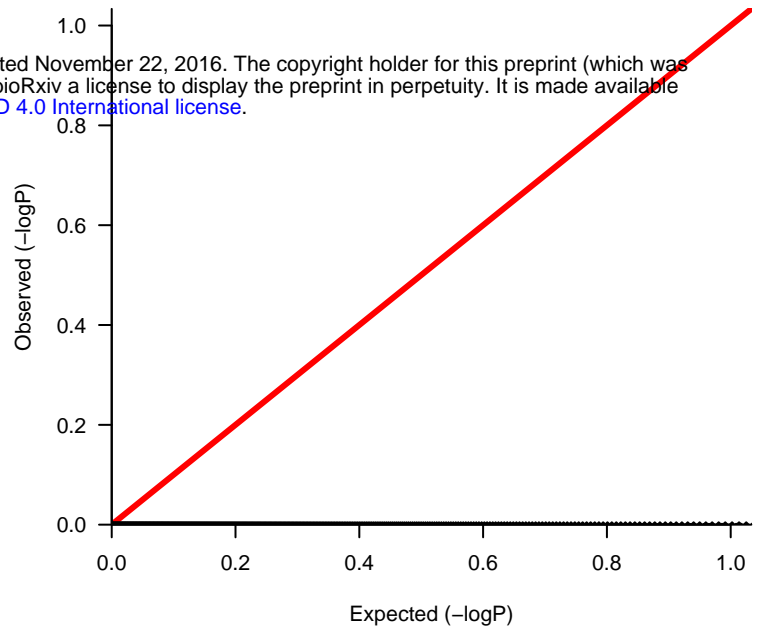

**rootWidth40**

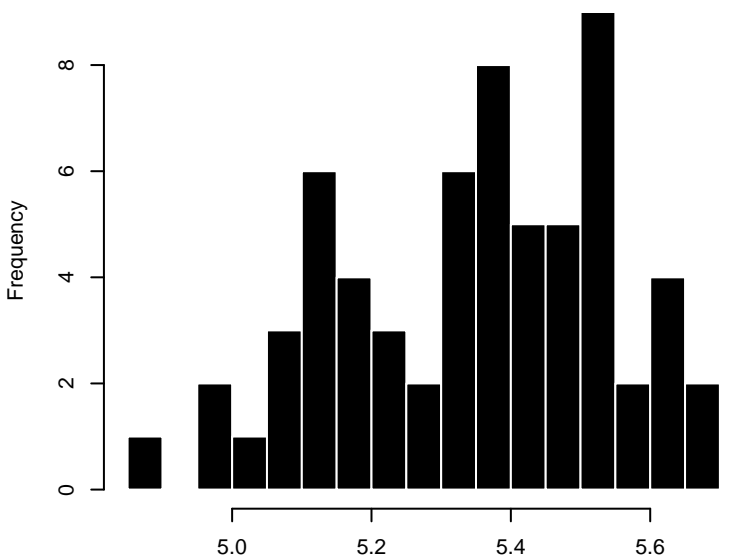

**lambda 0.059**

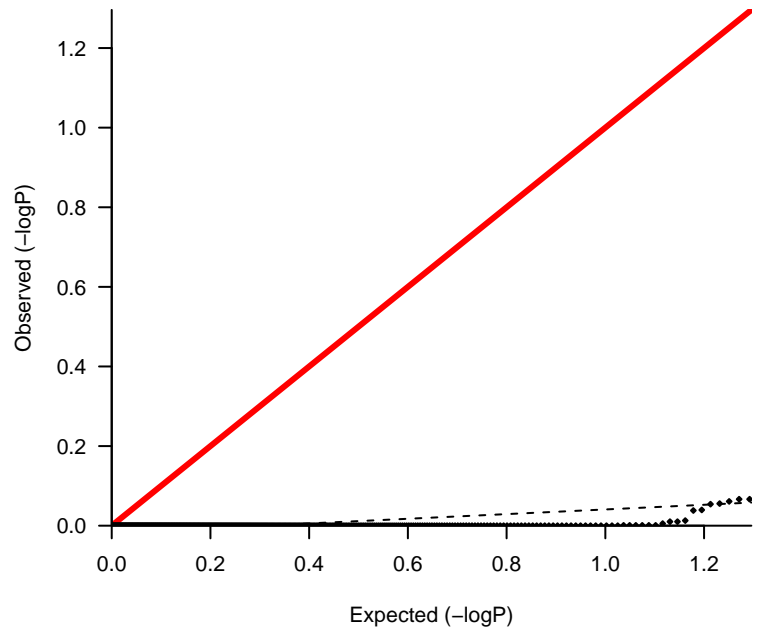

**rootWidth60**

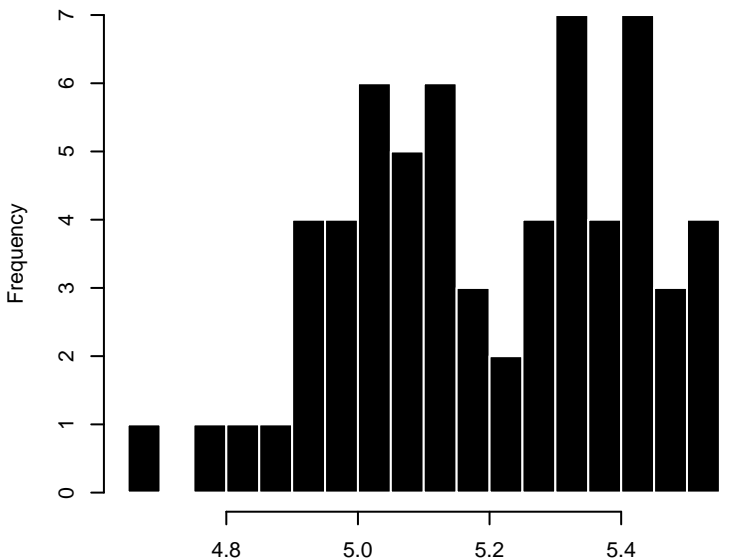

**lambda 0.089**

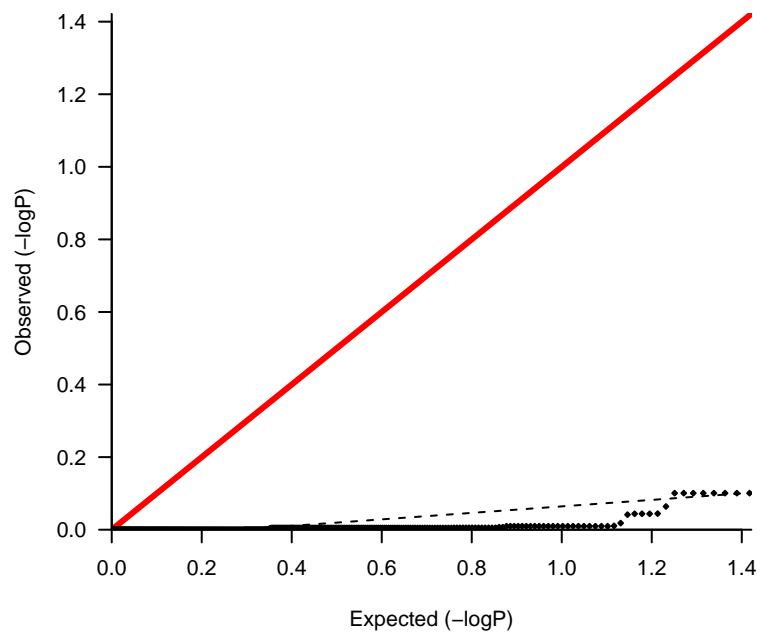

**rootWidth80**

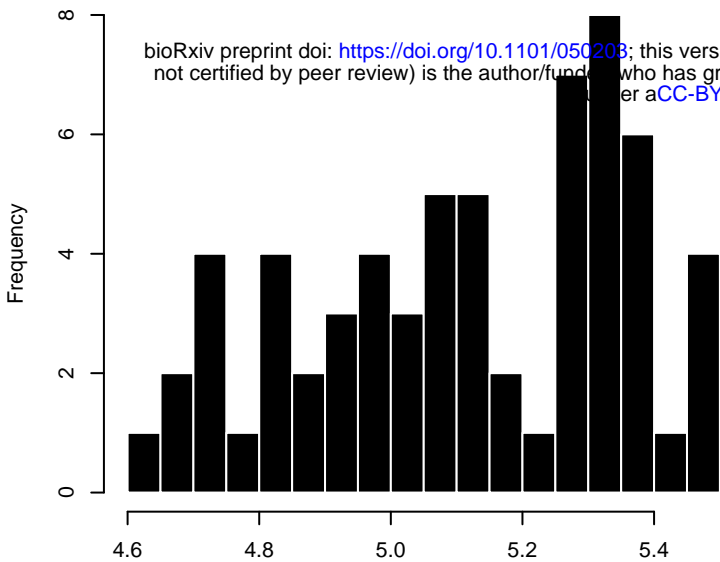

**lambda 0.068**

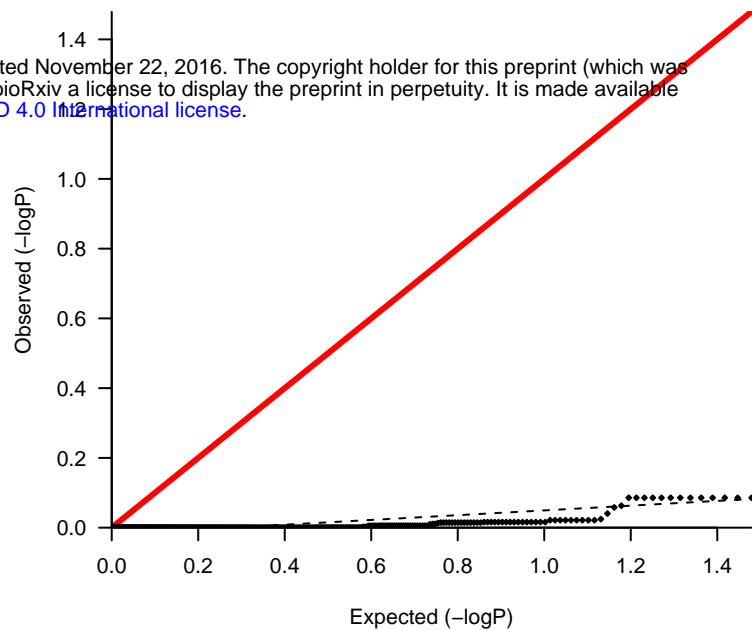

**rootWidth100**

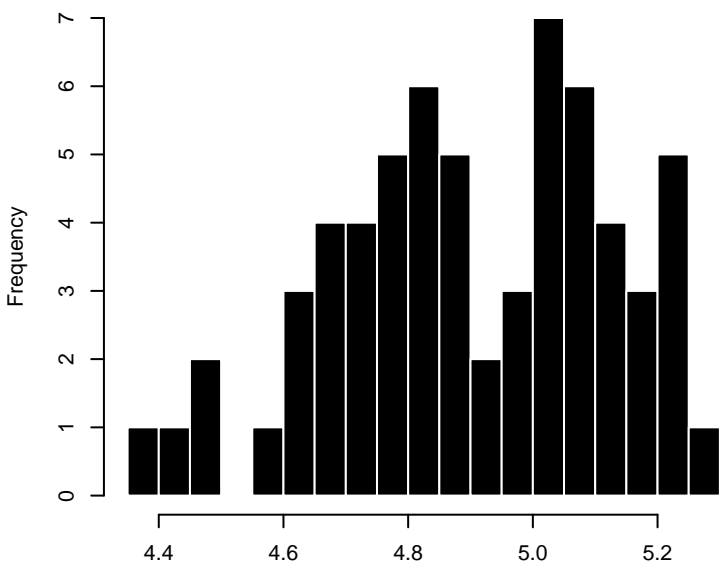

**lambda 0.04**

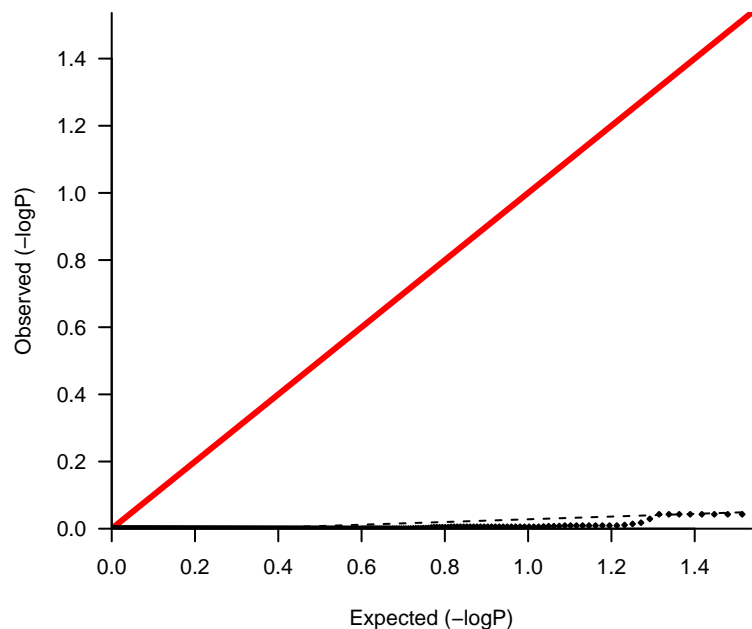

**gravitropicDir**

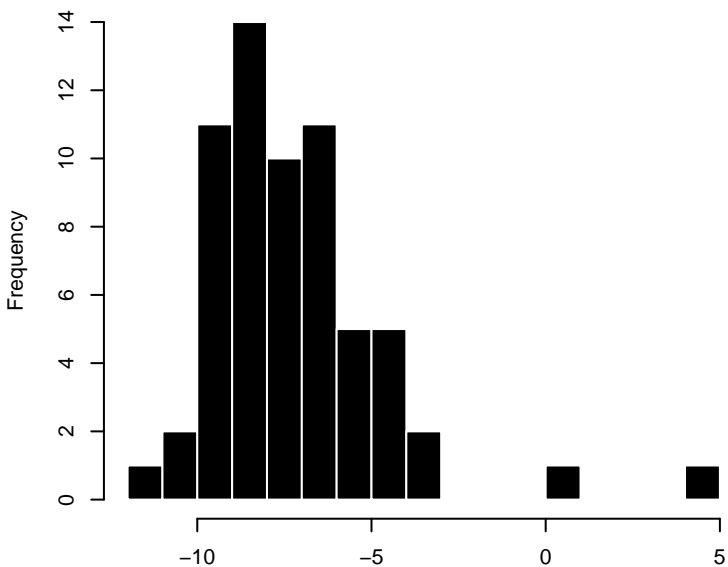

**lambda 0.059**

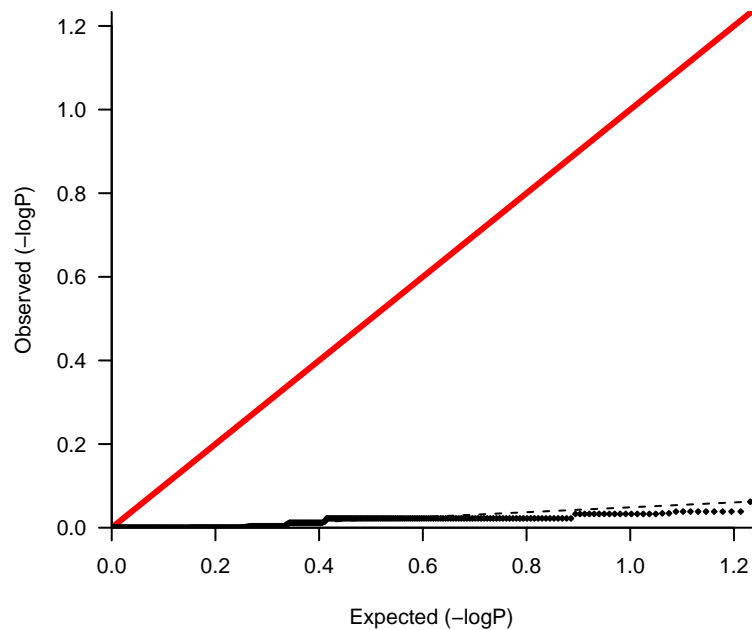

**gravitropicScore**

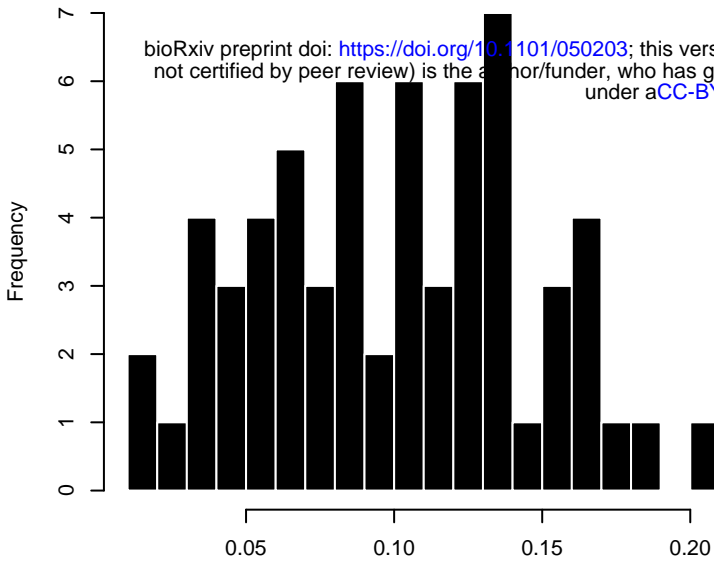

**lambda 0.478**

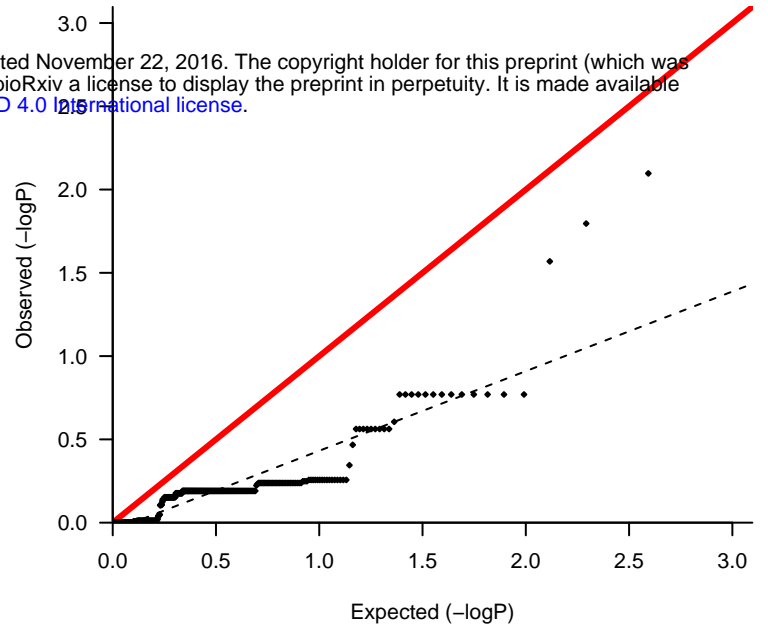

**TotLen.EucLen**

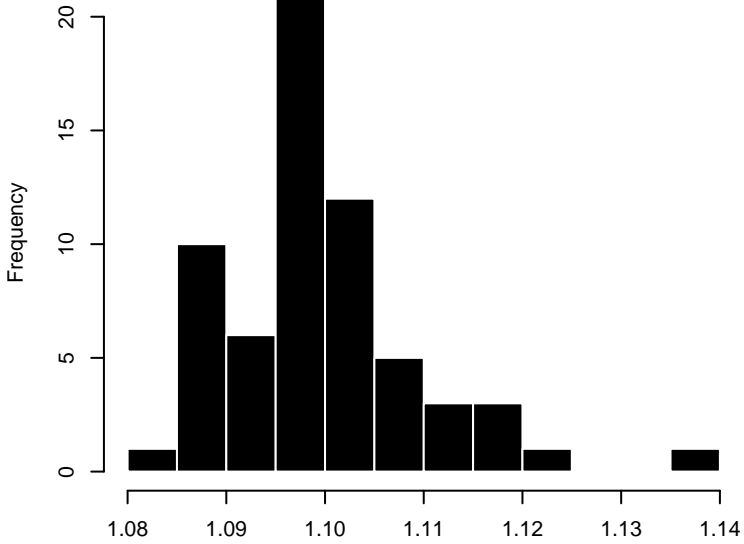

**lambda 0.685**

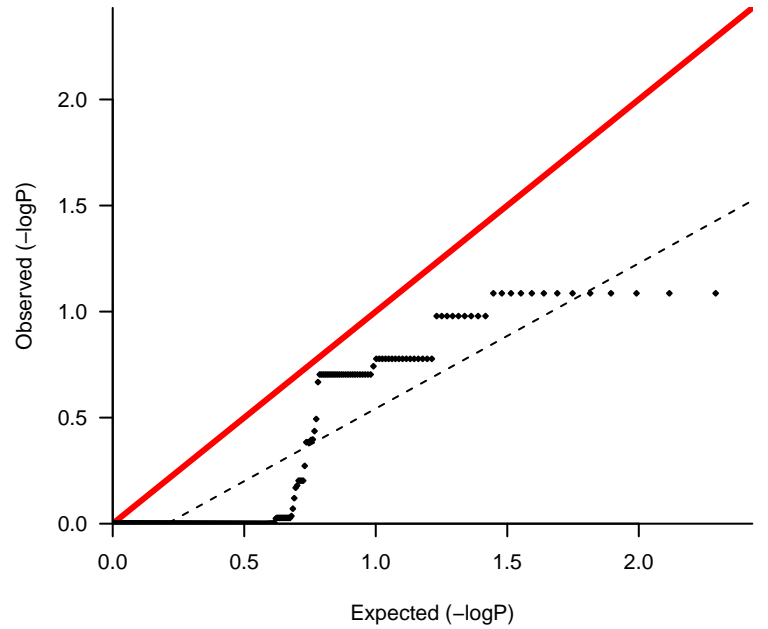

**GR.TL**

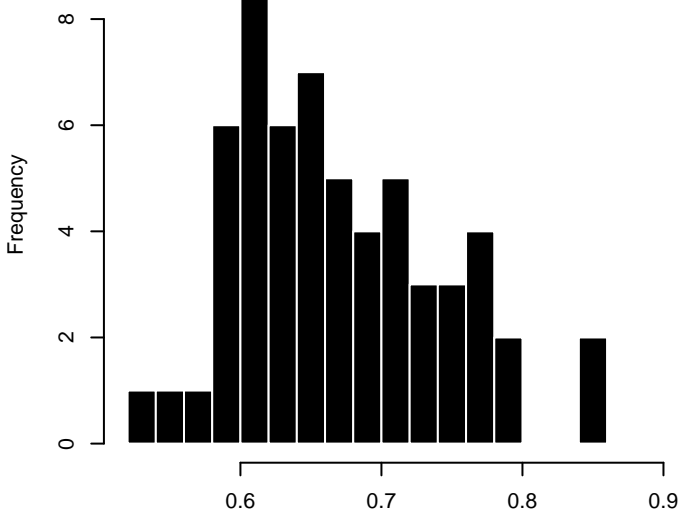

**lambda 0.036**

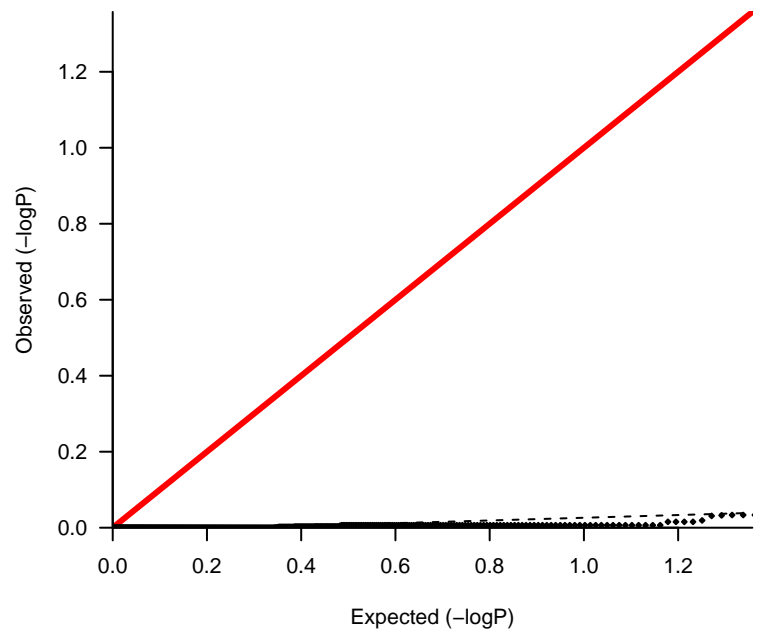

**seed\_size**

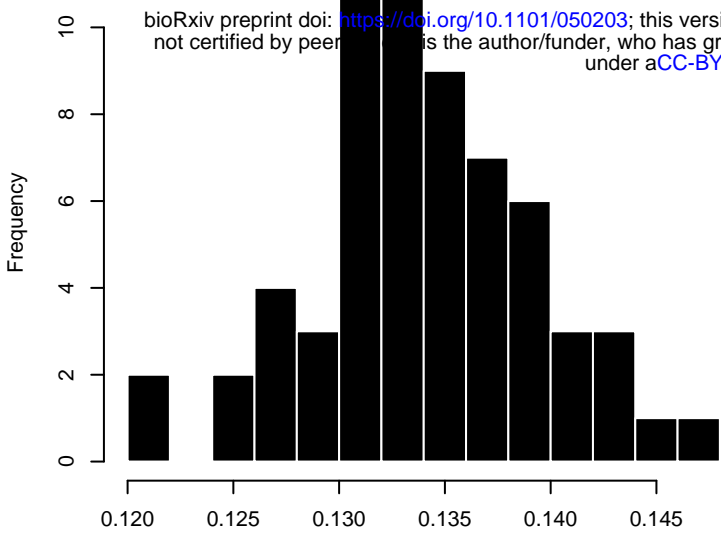

**lambda 0.279**

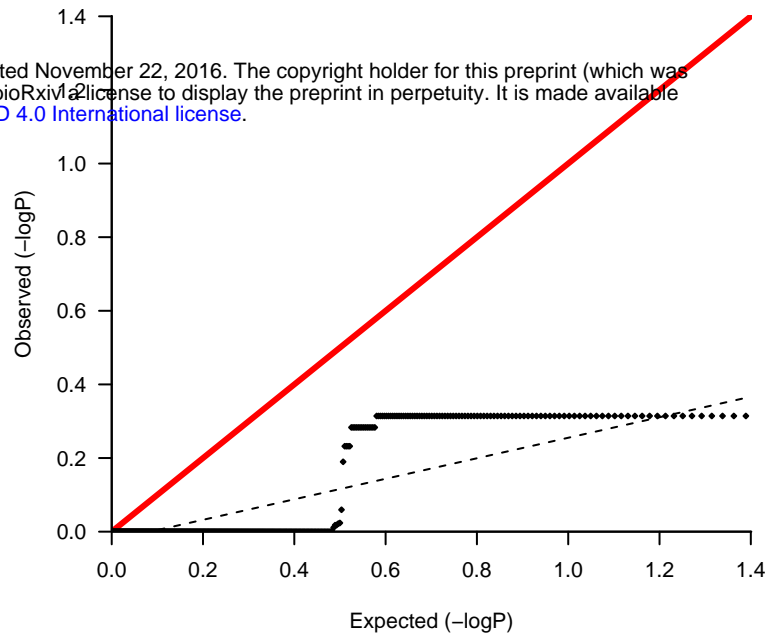

**FT\_V0**

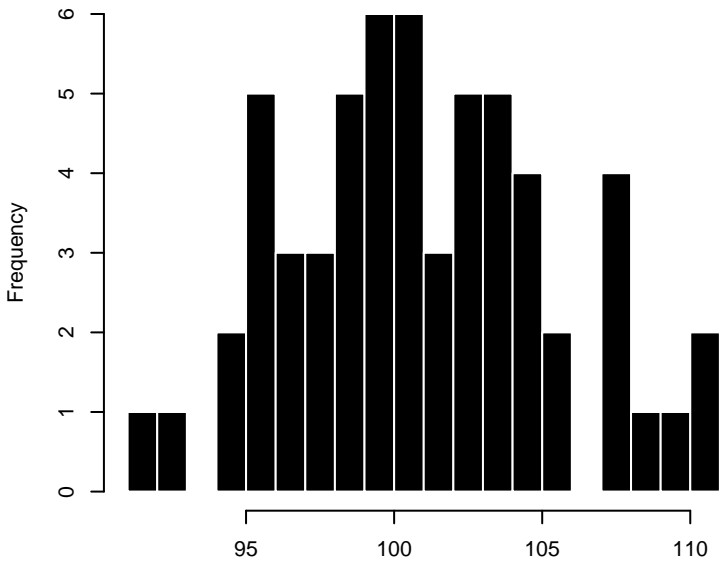

**lambda 0.012**

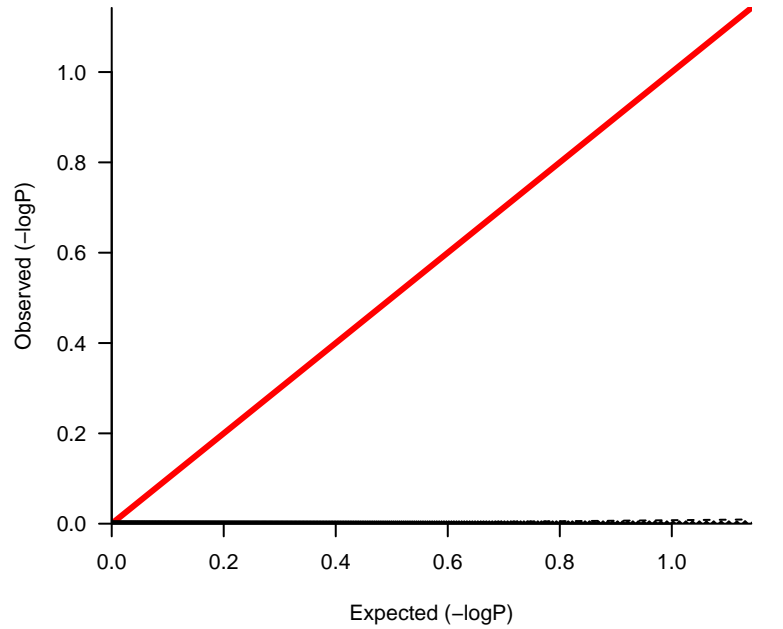

**FT\_V1**

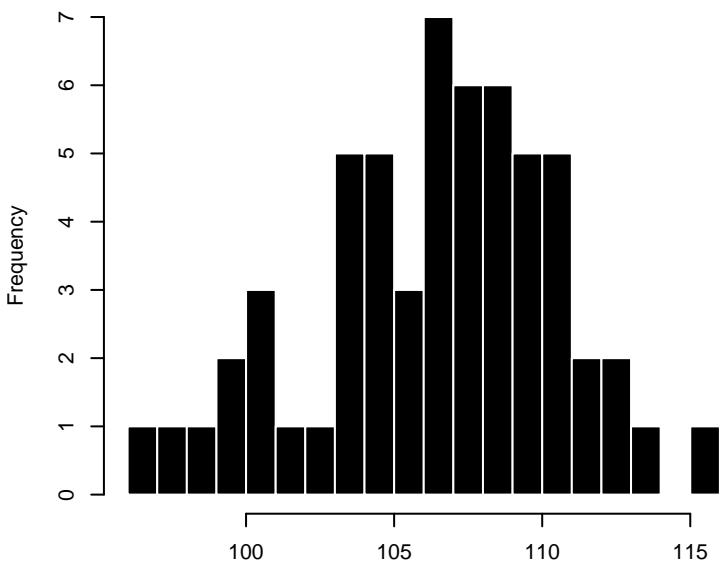

**lambda 0.434**

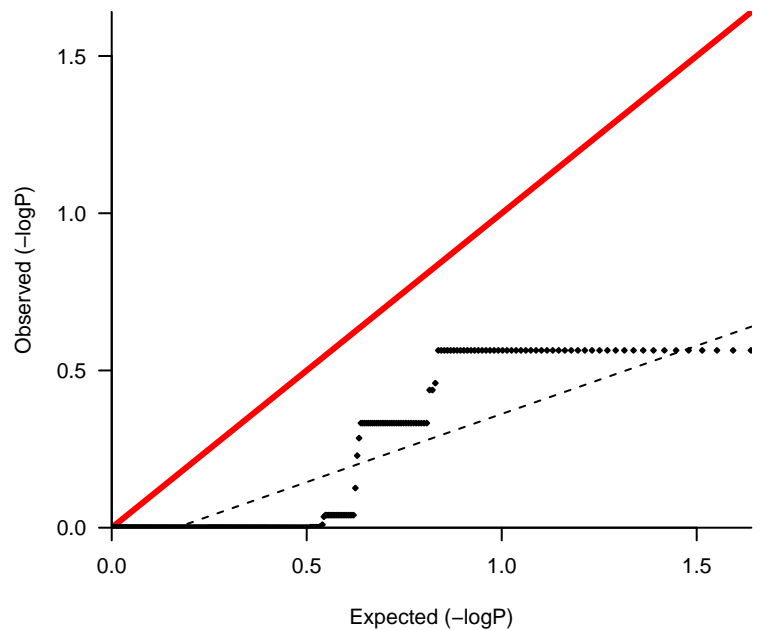

**FT\_V2**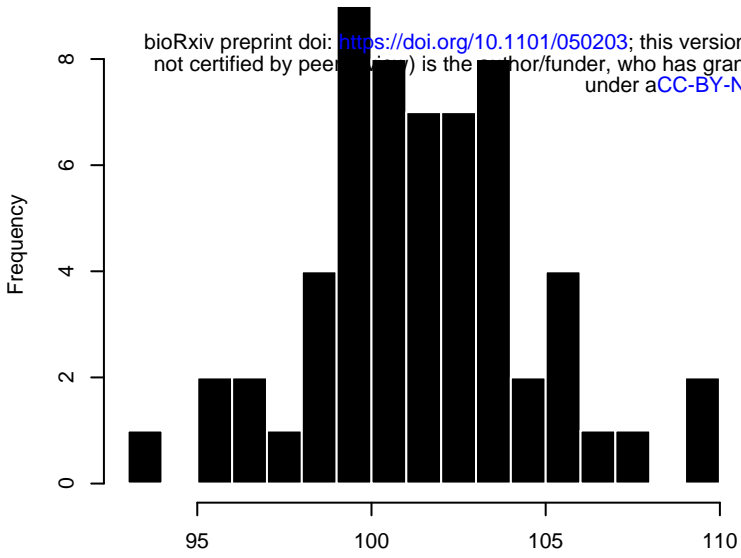**lambda 1.003**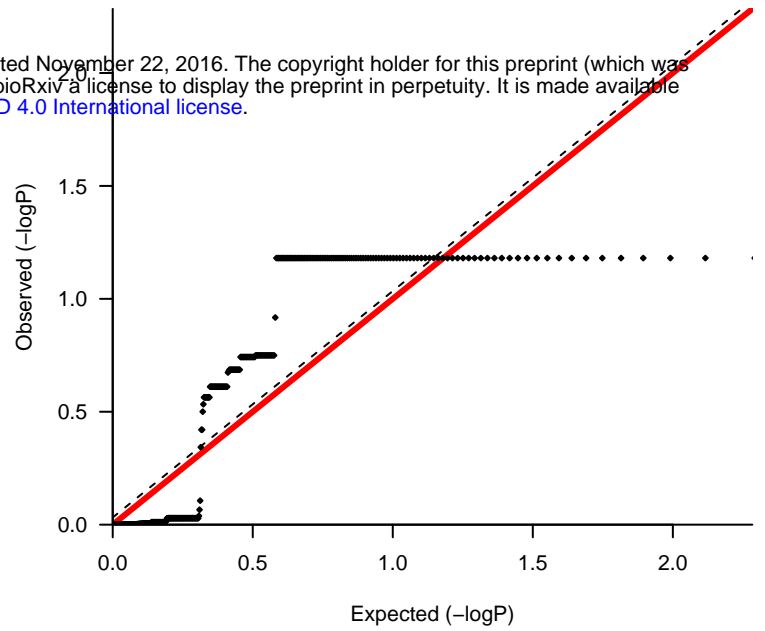**FT\_V3**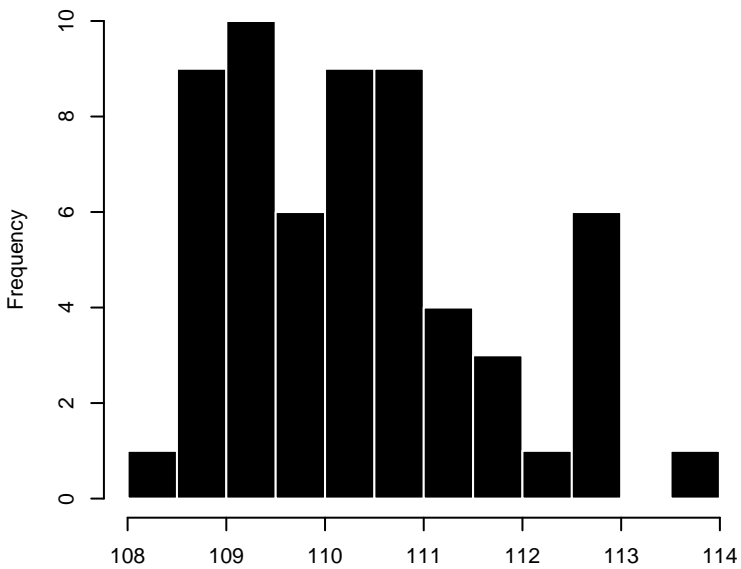**lambda 0.111**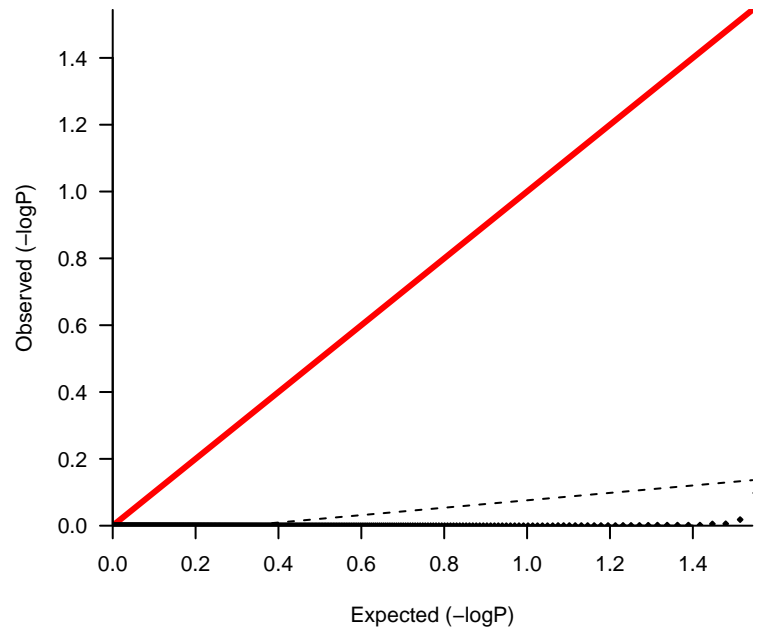**B\_V0**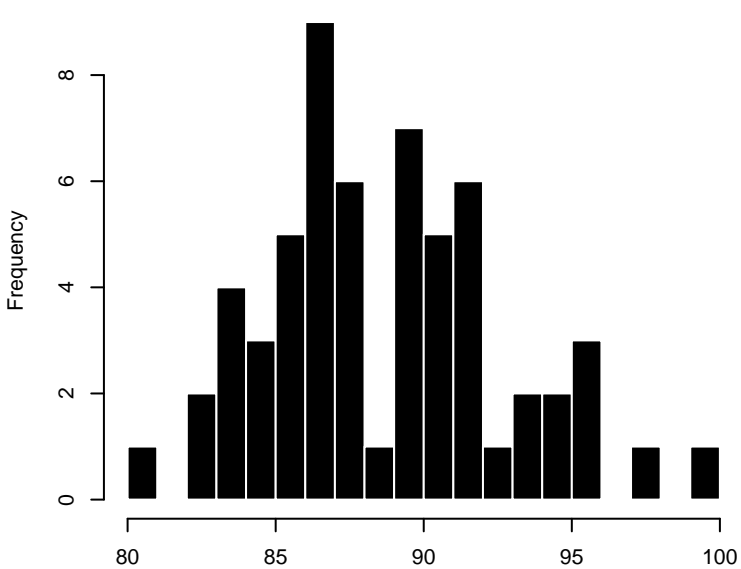**lambda 0.004**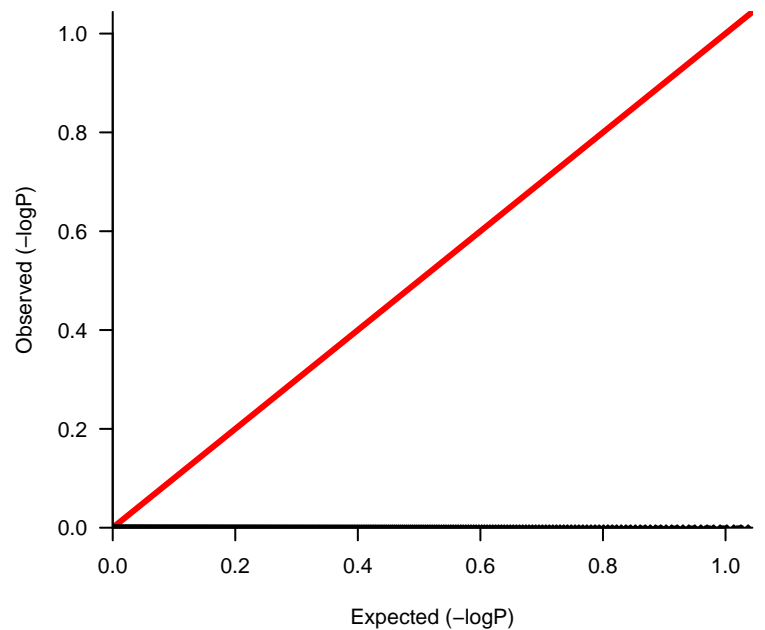



**B\_V1**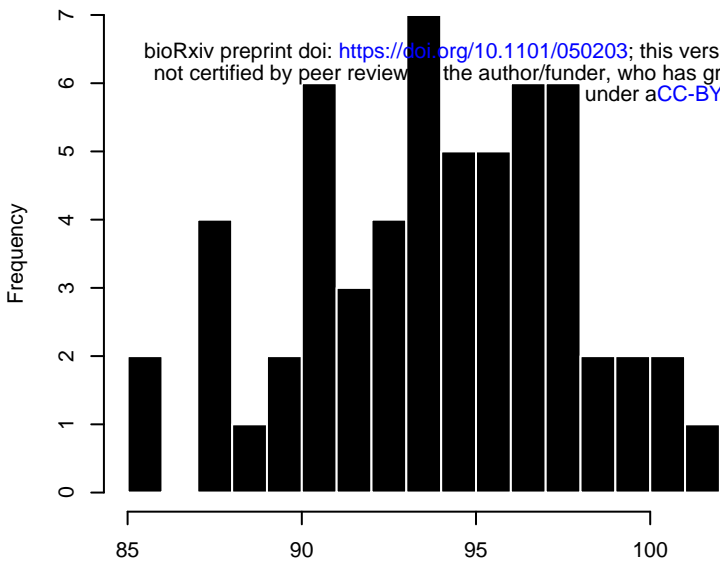**lambda 0.192**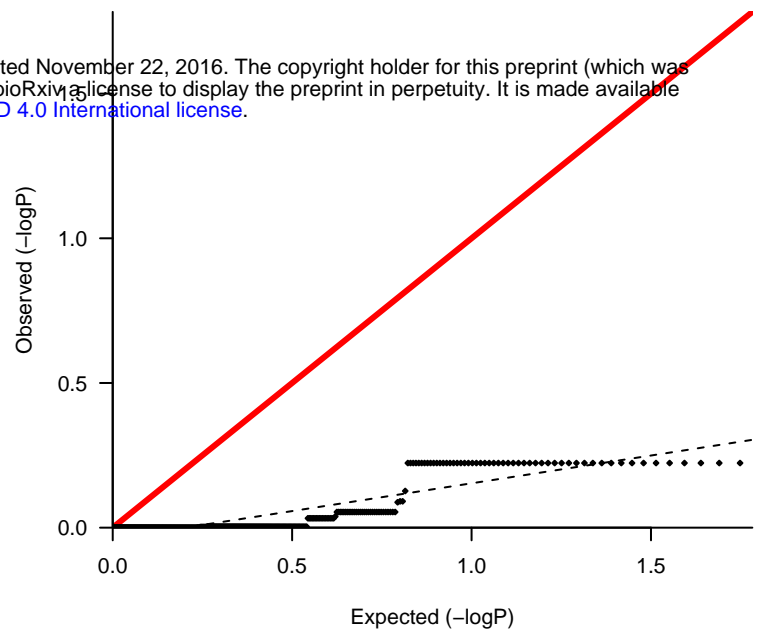**B\_V2**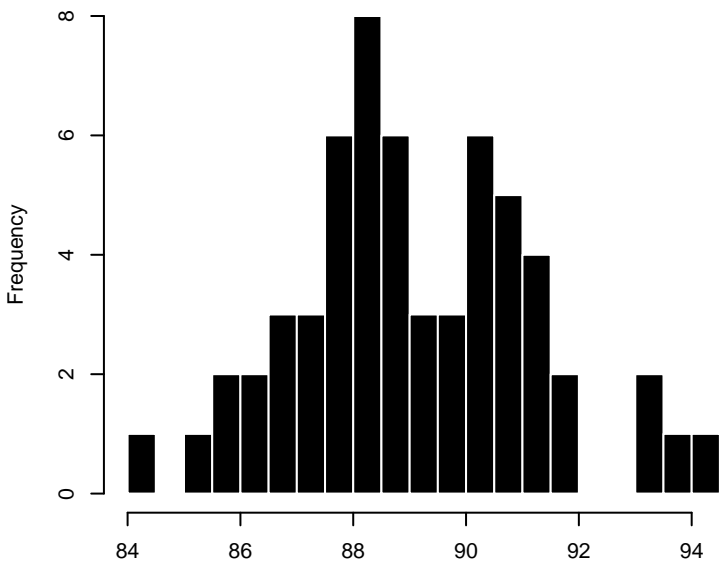**lambda 0.532**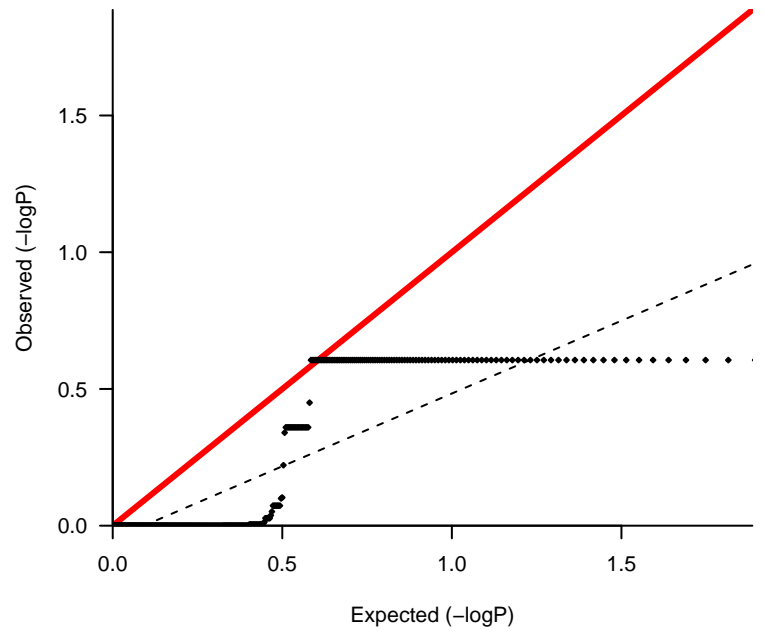**B\_V3**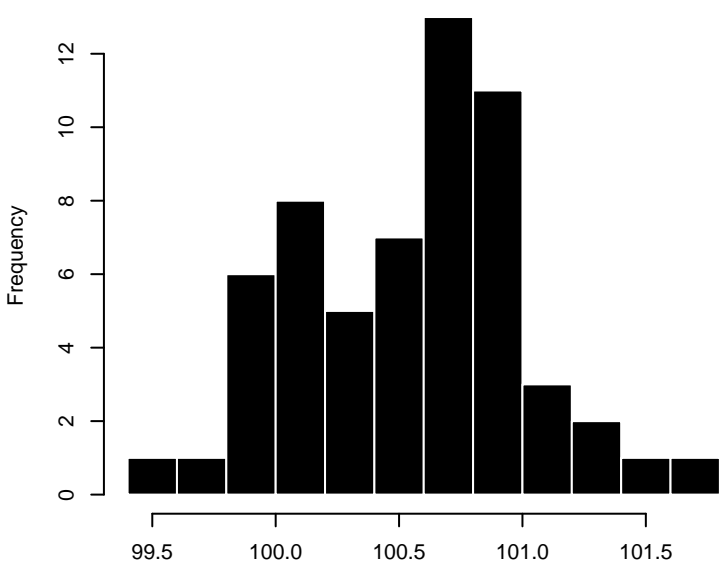**lambda 0.227**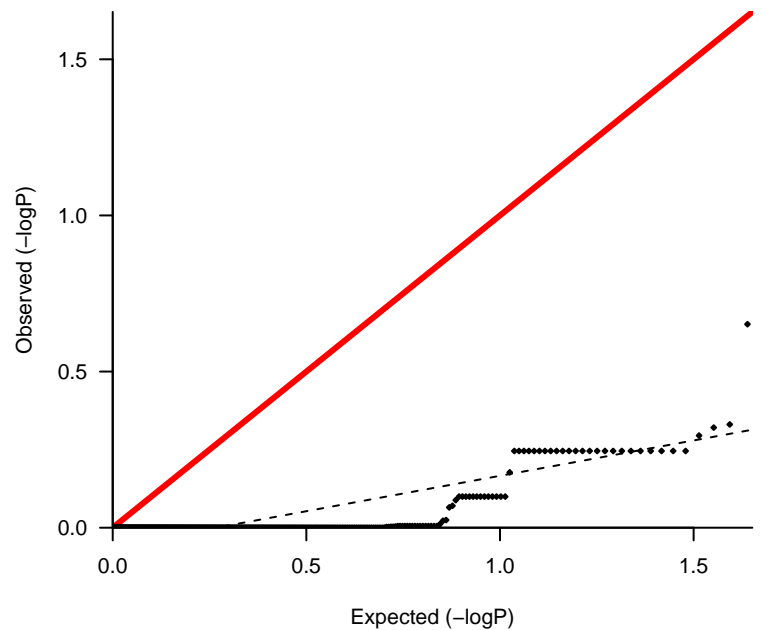



**bio1**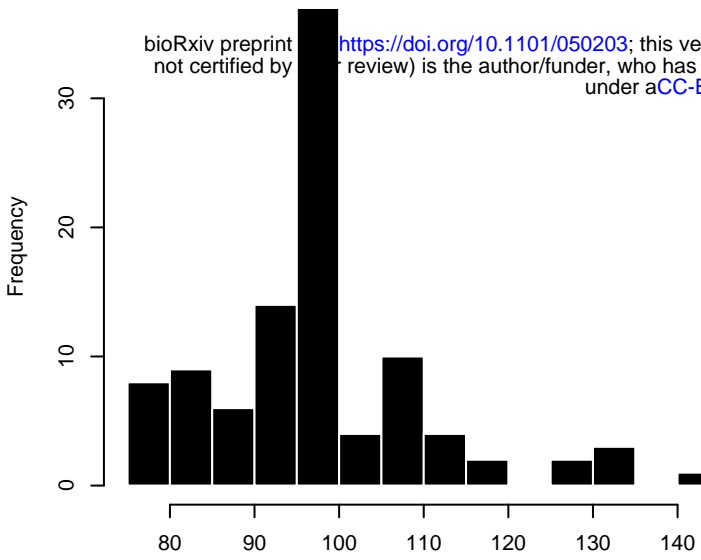**lambda 0.074**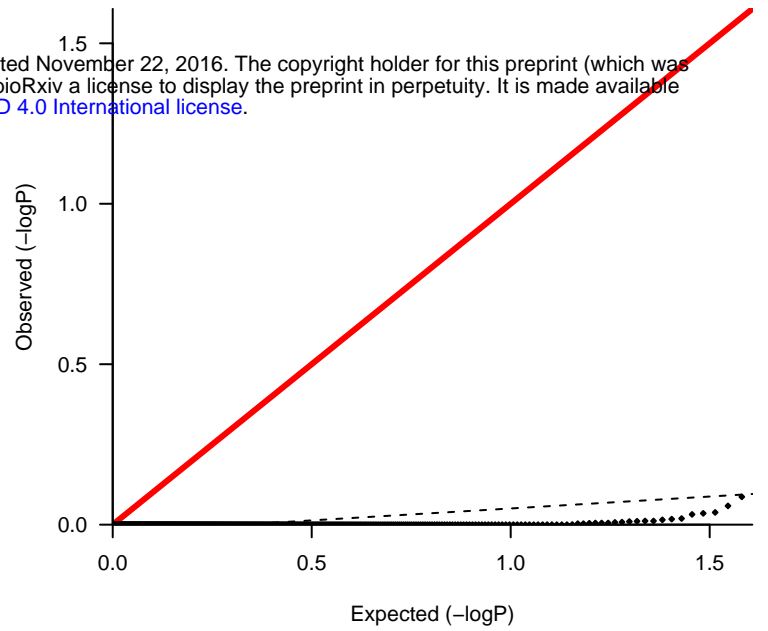**bio2**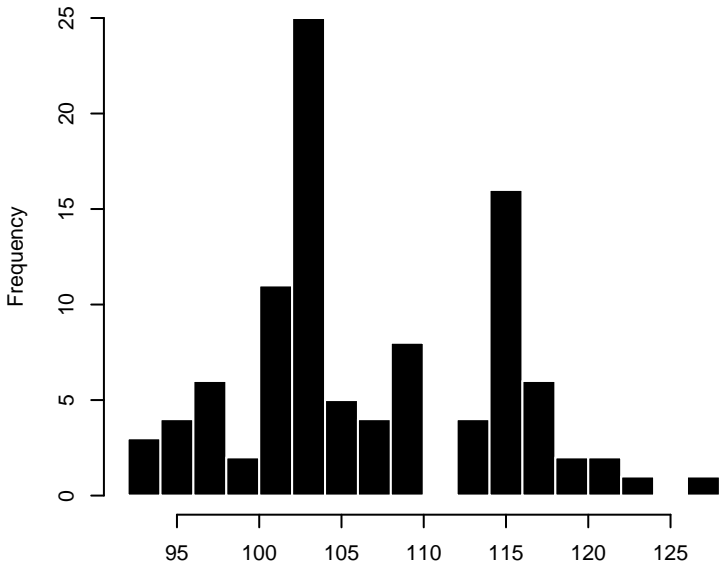**lambda 0.024**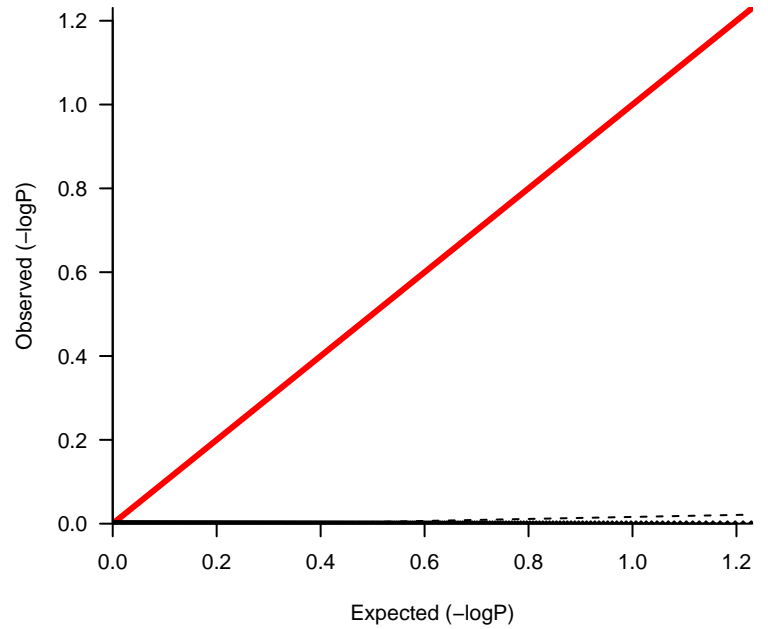**bio3**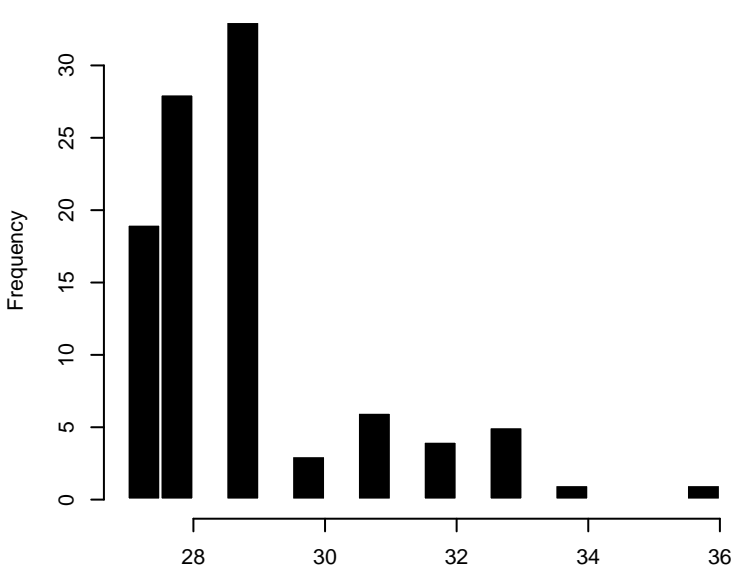**lambda 0.138**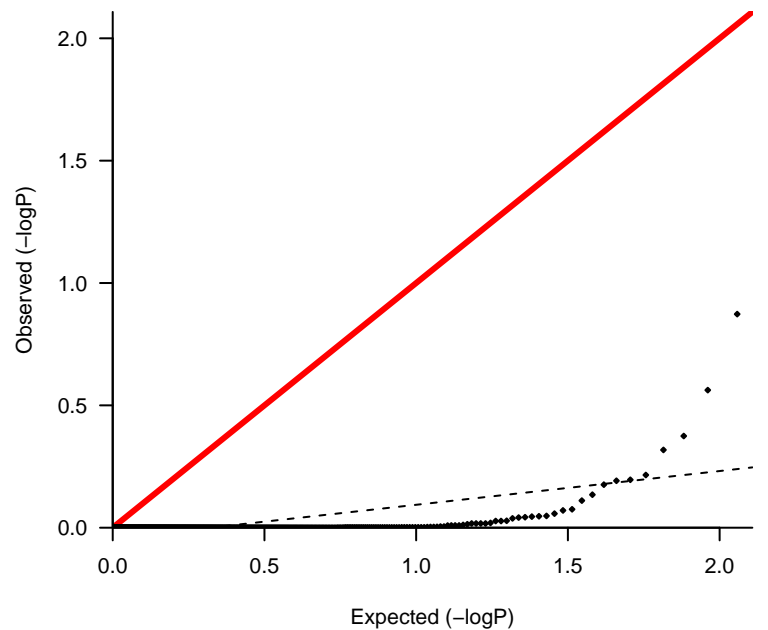

**bio4**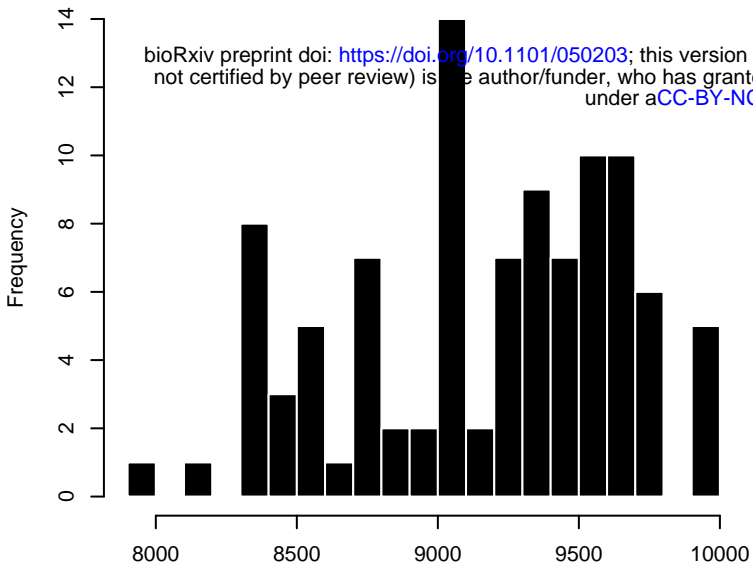**lambda 0.606**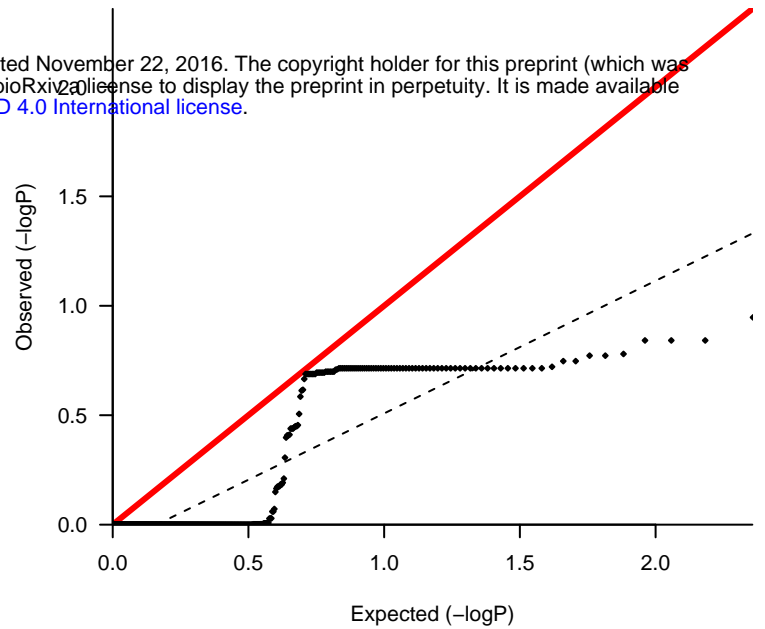**bio5**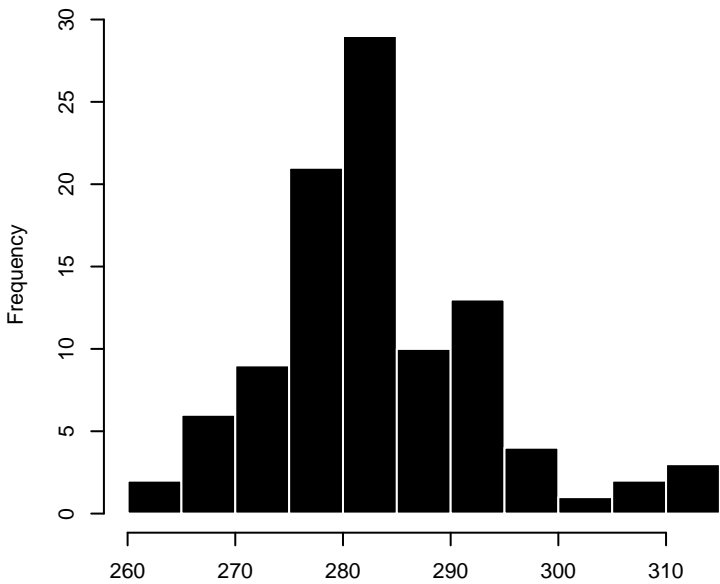**lambda 0.054**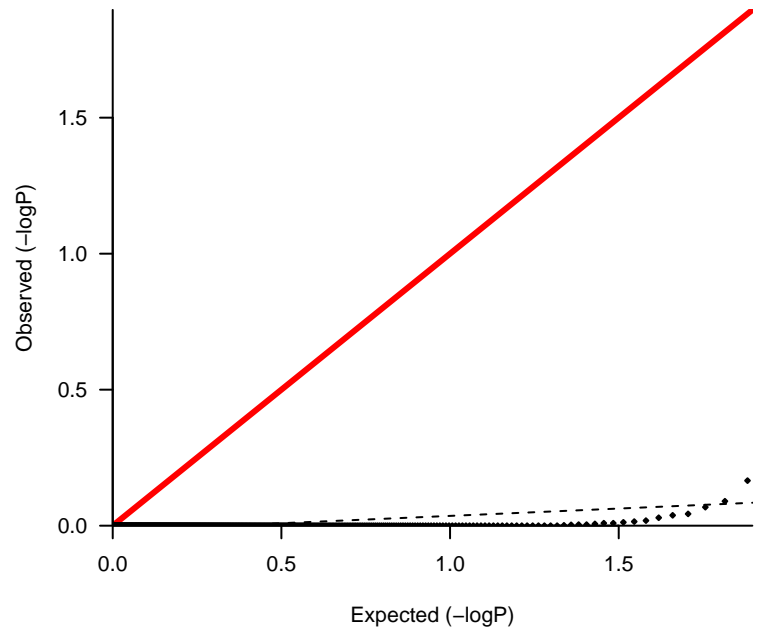**bio6**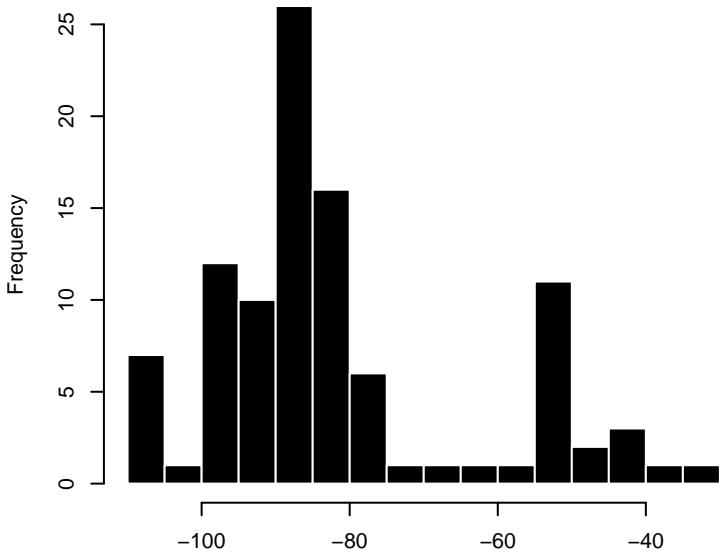**lambda 0.58**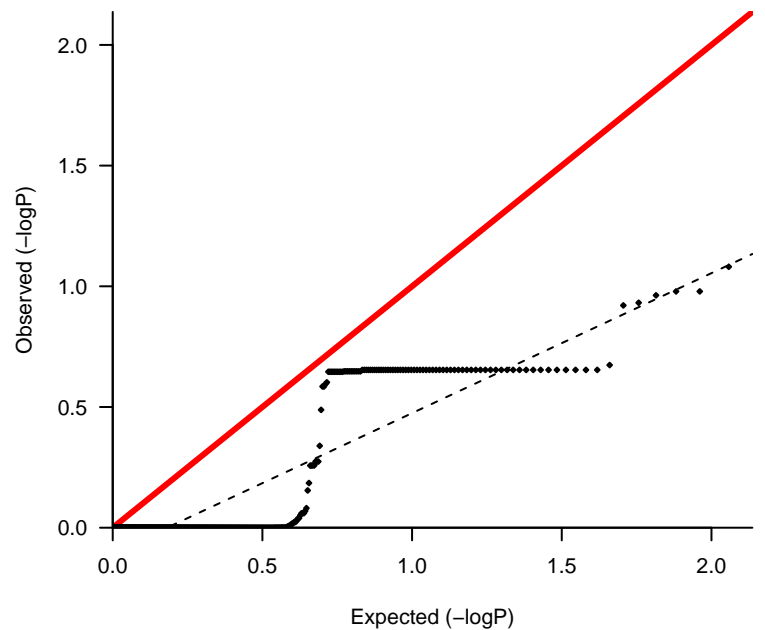

**bio7**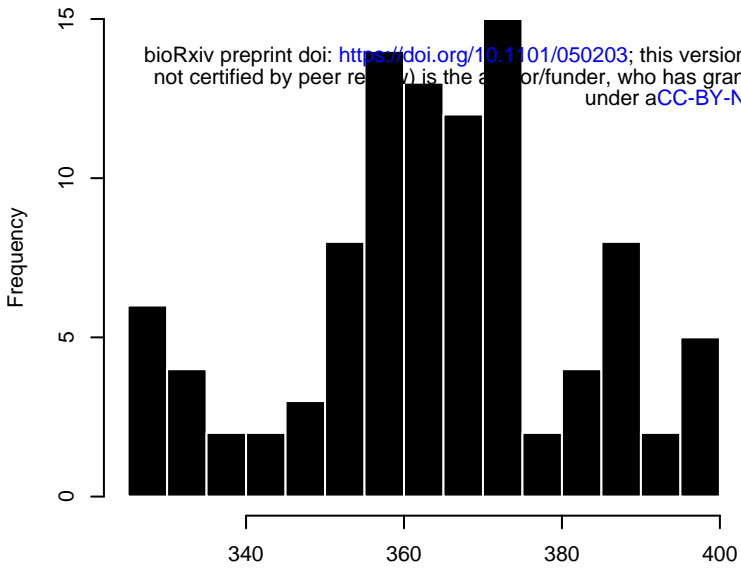**lambda 0.283**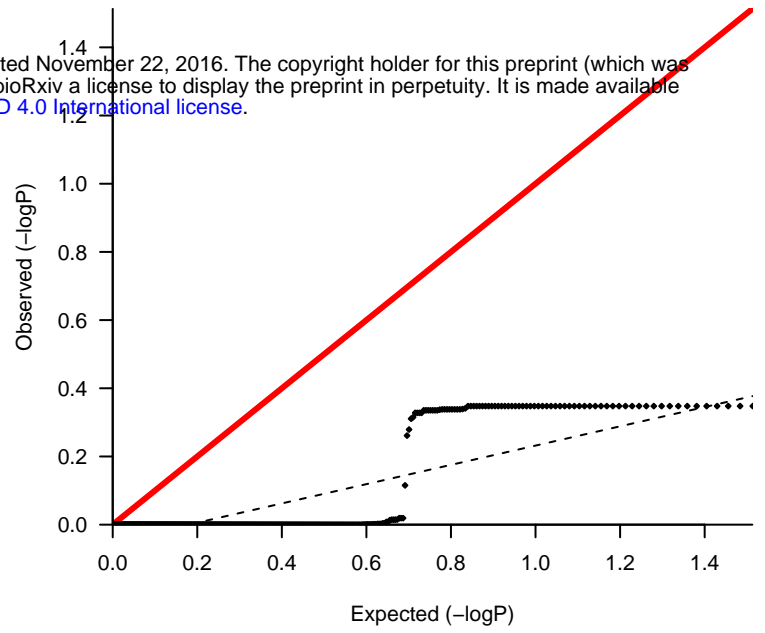**bio8**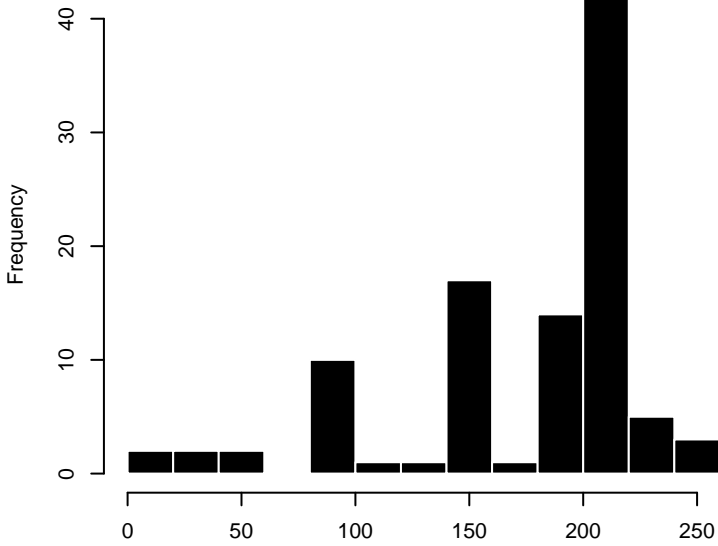**lambda 0.189**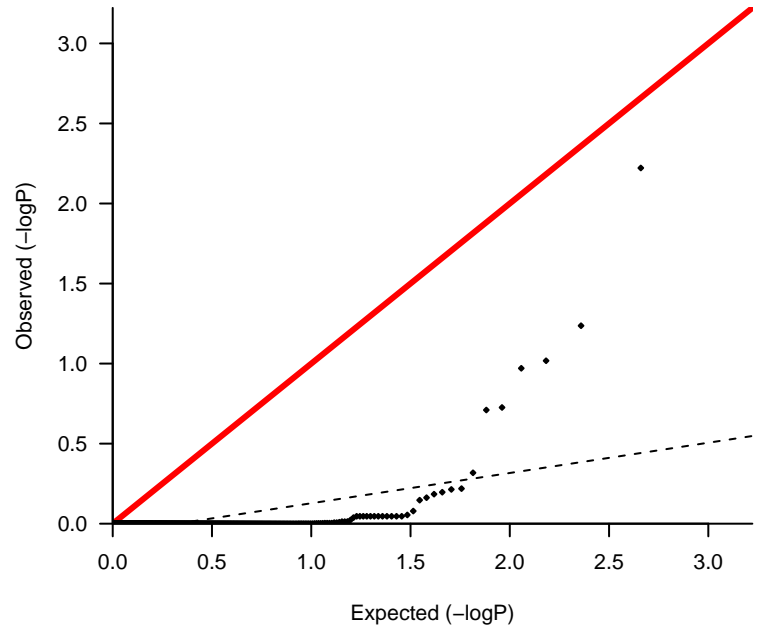**bio9**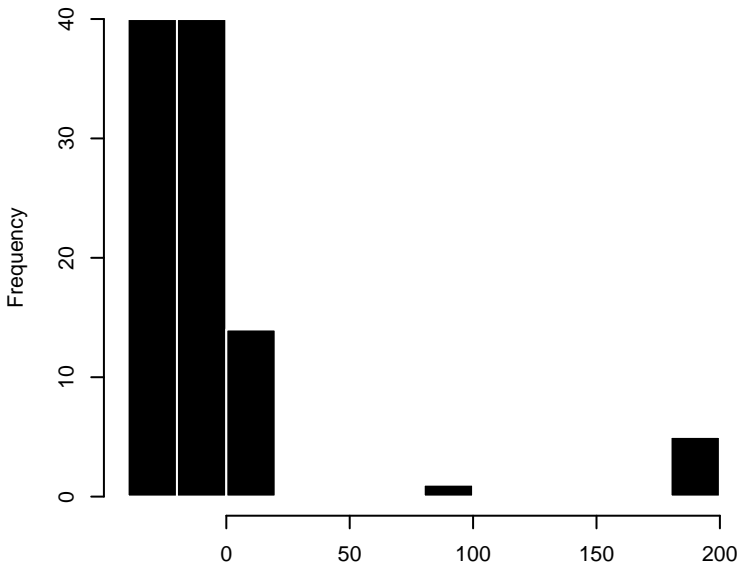**lambda 0.028**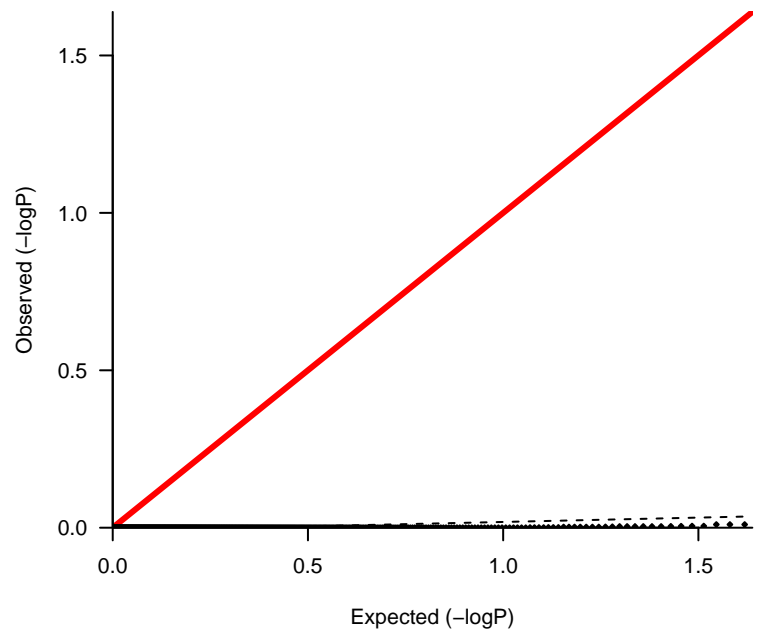

**bio10**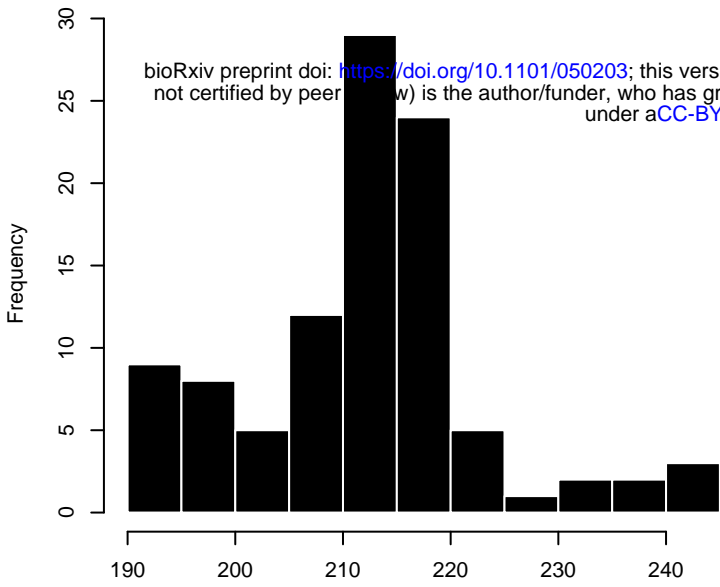**bio11**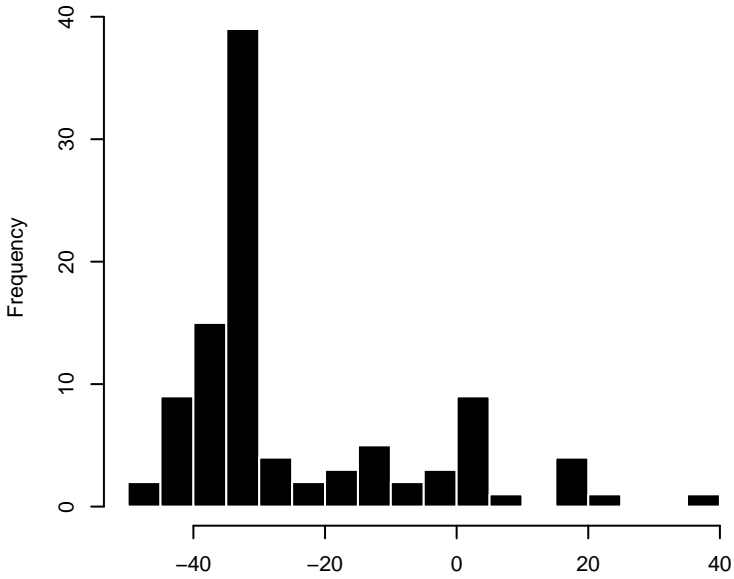**bio12**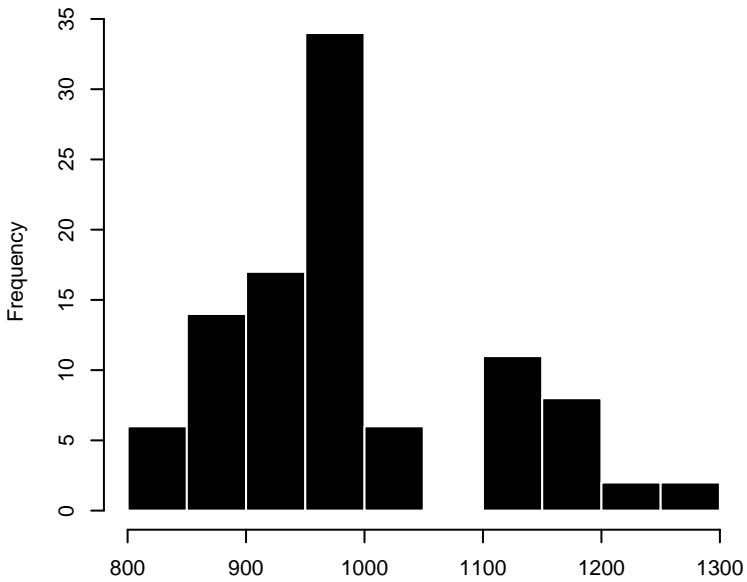

**bio13**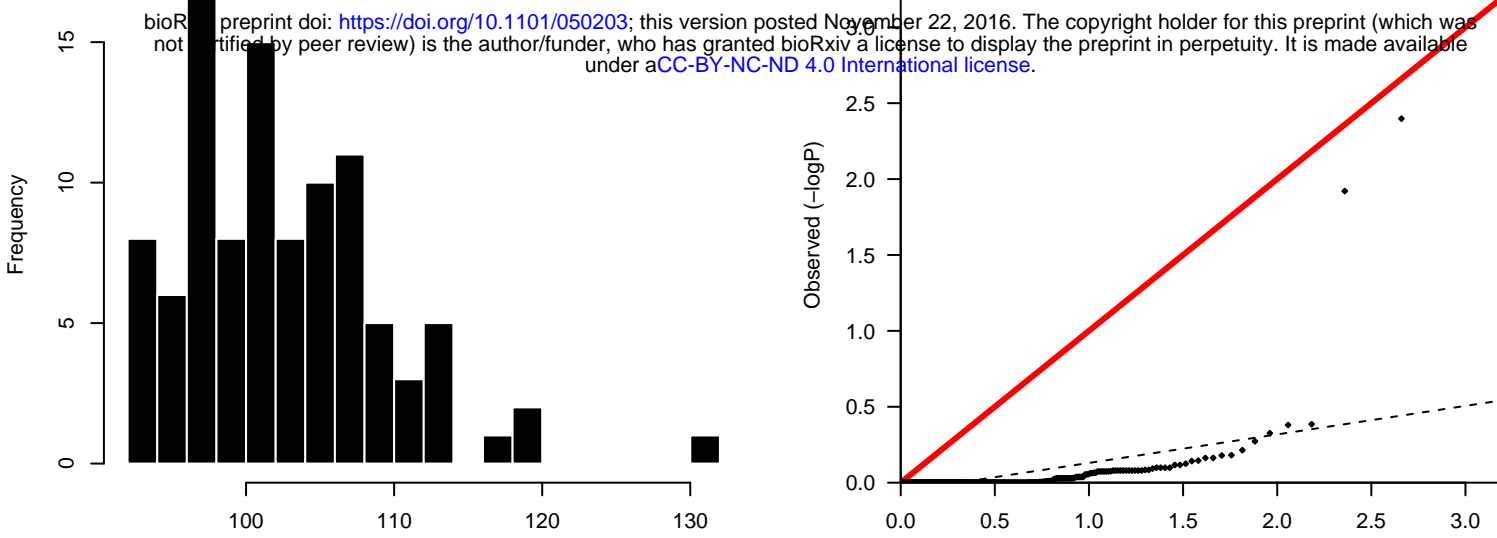**lambda 0.188**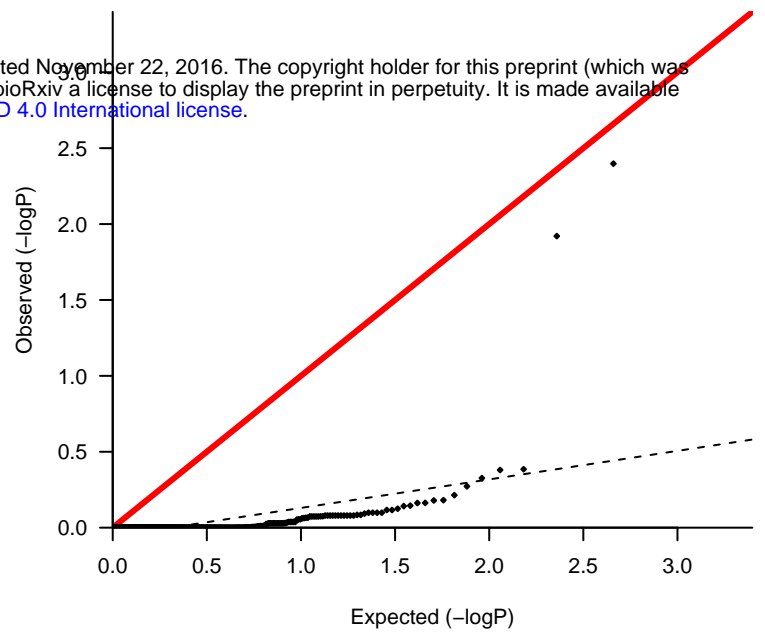**bio14**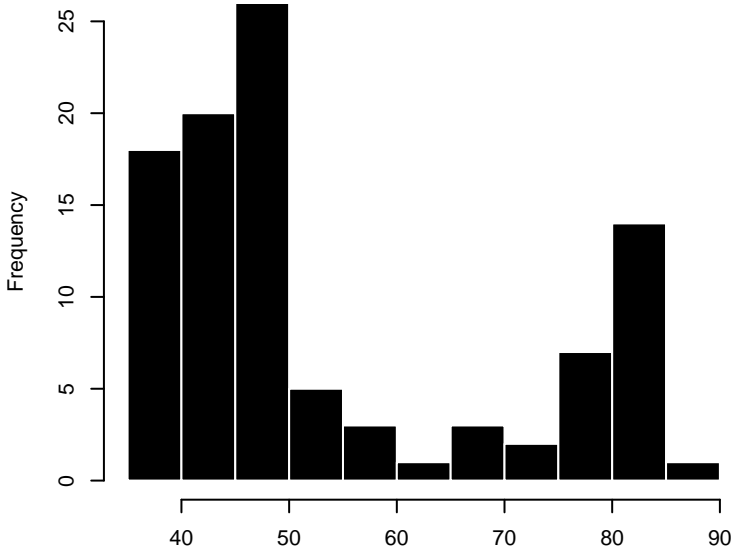**lambda 0.078**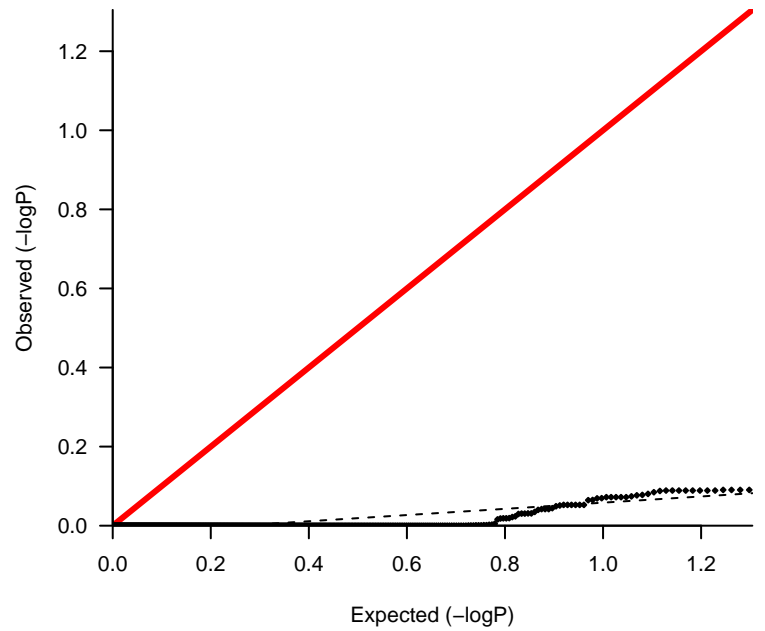**bio15**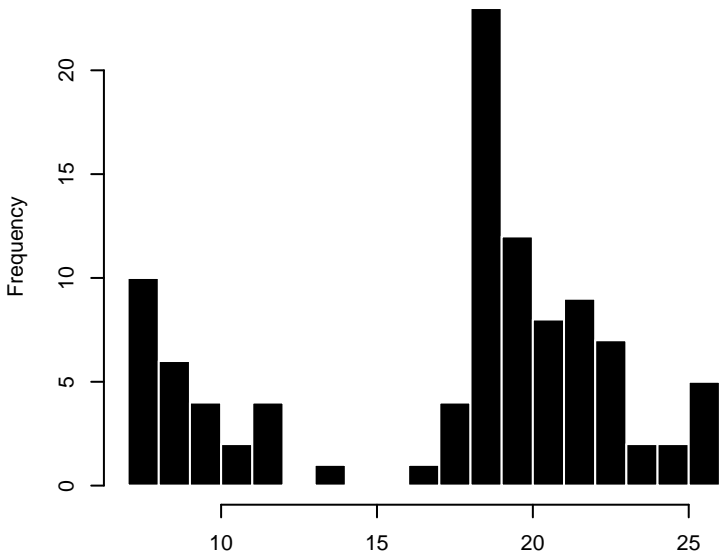**lambda 0.382**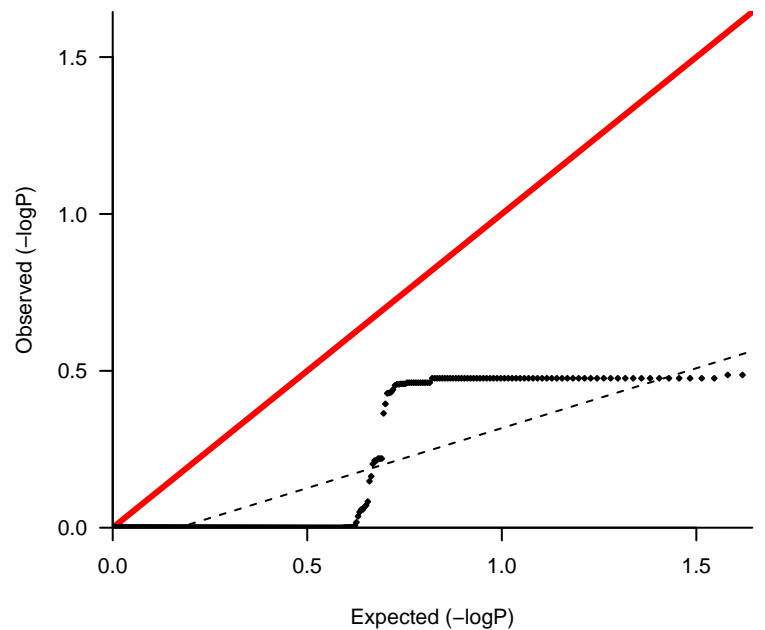

**bio16**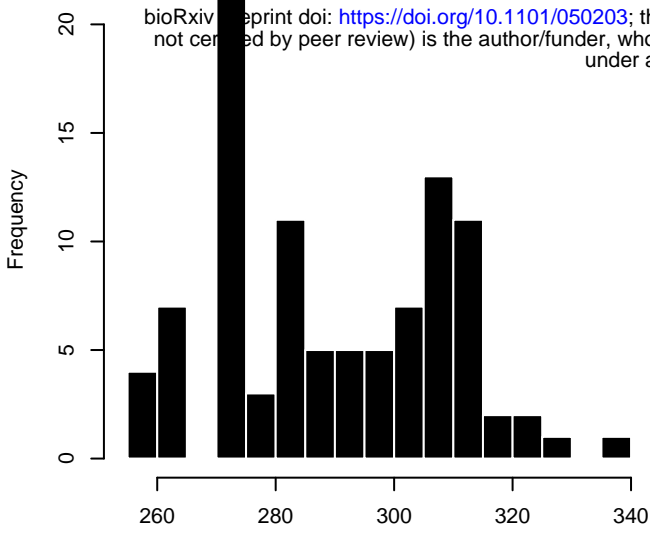**lambda 0.221**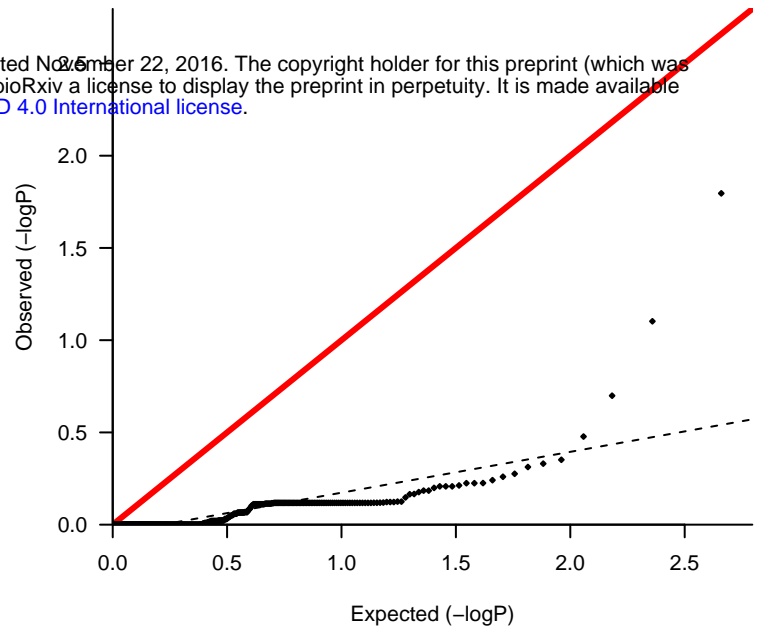**bio17**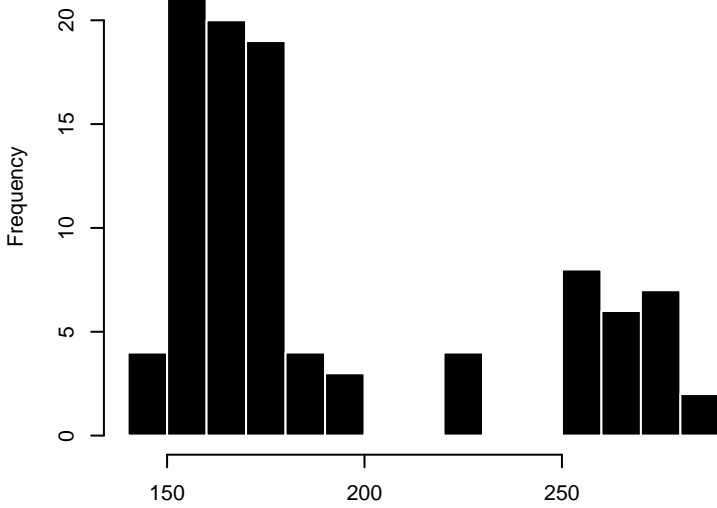**lambda 0.044**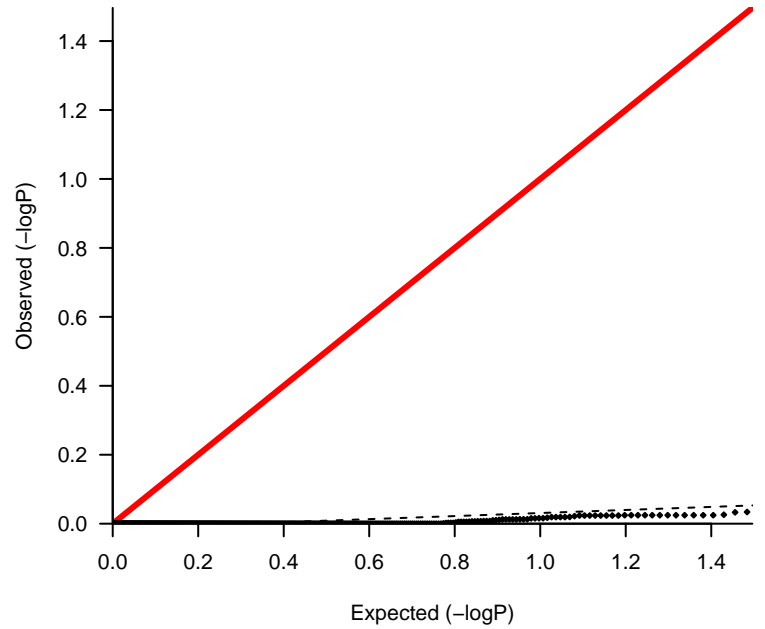**bio18**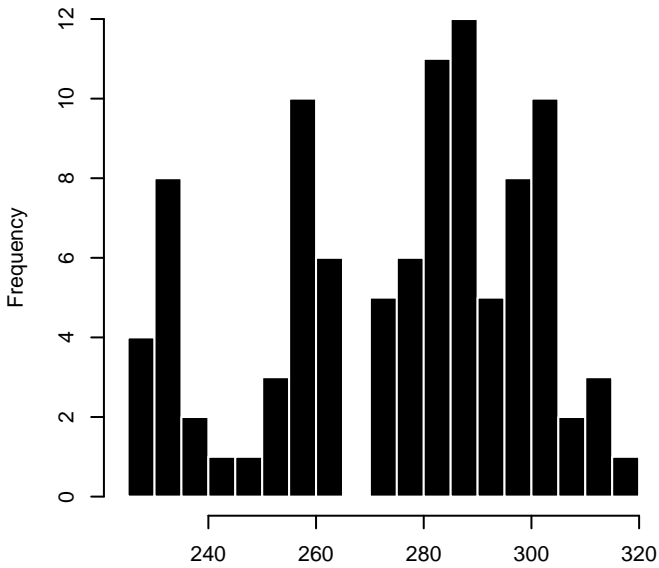**lambda 0.848**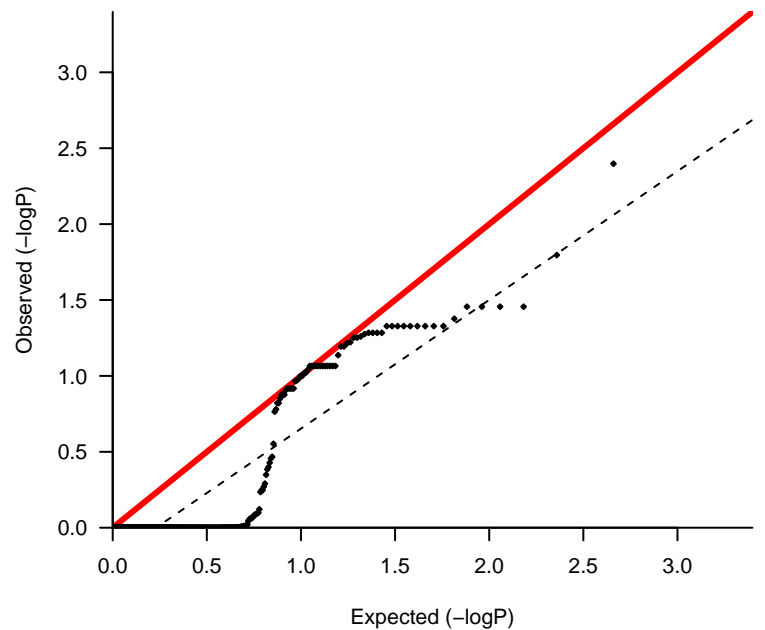



bioRxiv preprint doi: <https://doi.org/10.1101/050203>; this version posted November 22, 2016. The copyright holder for this preprint (which was not certified by peer review) is the author/funder, who has granted bioRxiv a license to display the preprint in perpetuity. It is made available under aCC-BY-NC-ND 4.0 International license.

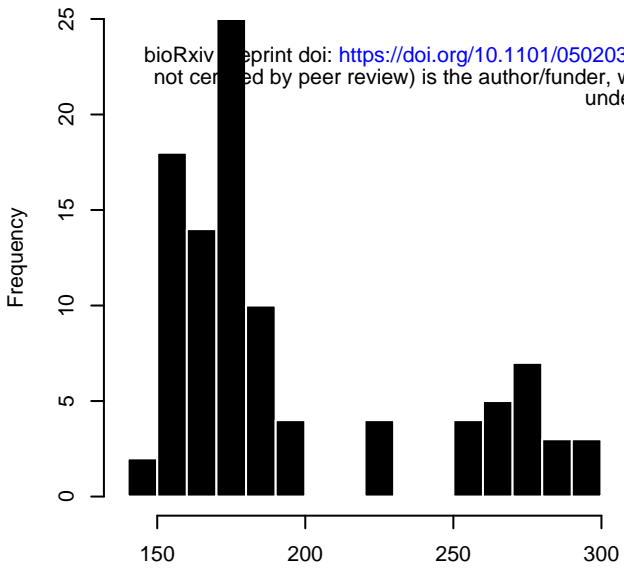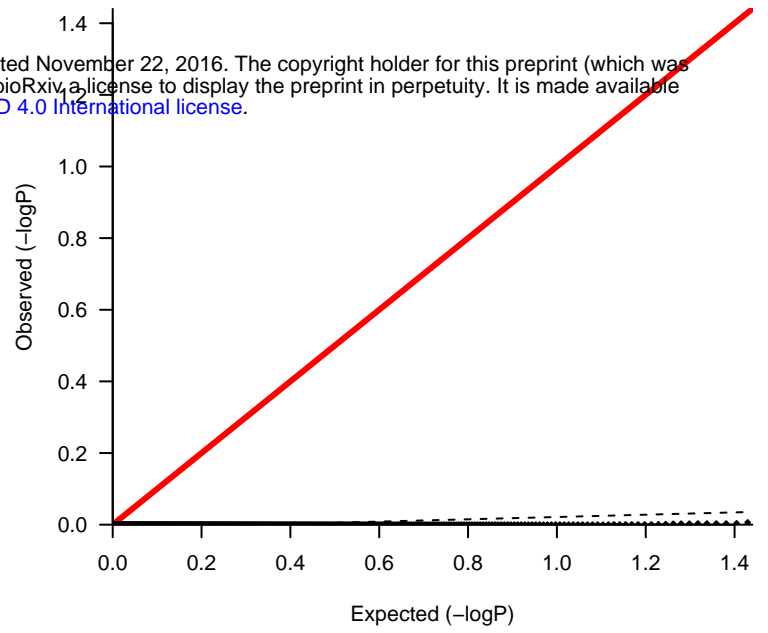

Source: https://www.biorxiv.org/content/10.1101/050203v2.full.pdf
